# Supplementary material
Source: bioRxiv or medRxiv preprint supplement (https://www.biorxiv.org/highwire/filestream/115495/field_highwire_adjunct_files/0/379958-1.pdf)
Supplement: Supplementary file [file 379958-1.pdf]

**Supplementary Figure 1:** Mean  $C_\alpha$  protein RMSD (top) and standard deviations (bottom) for each PI ensemble

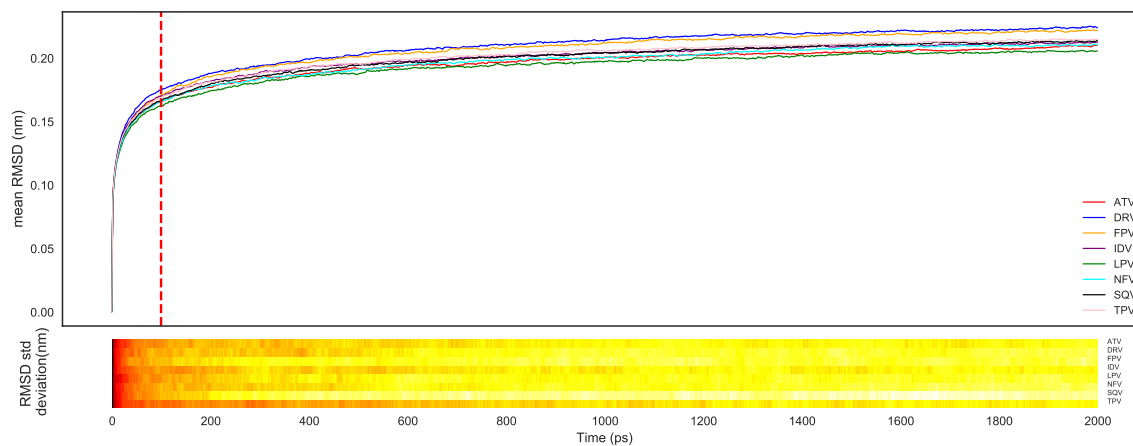

**Figure S1:** Mean  $C_\alpha$  RMSD values obtained across 200 complexes over the duration of the MD simulations for each of ATV, DRV, FPV, IDV, LPV, NFV, SQV and TPV. The red dotted line depicts the 100ps region beyond which the MD runs stabilize. At the bottom, the heat map shows the standard deviations of the RMSD values for the same drugs, with higher values colored red, through yellow and white which represent lower values.

**Supplementary Figure 2:** Distributions of  $R_g$  values for the different PI ensembles in the replicate run.

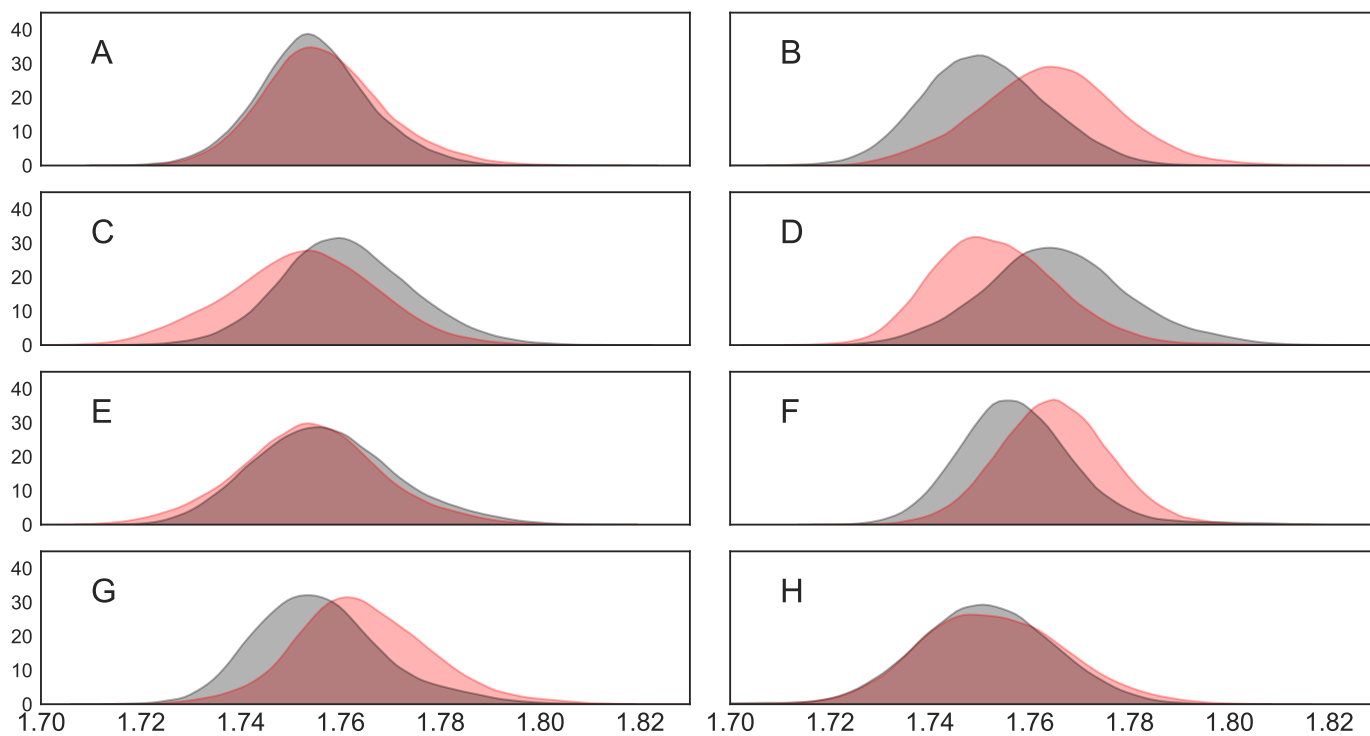

**Figure S2:** Density distributions for the radii of gyration for each HIV protease drug resistance ensemble for (A) ATV, (B) DRV, (C) FPV, (D) IDV, (E) LPV, (F) NFV, (G) SQV and (H) TPV, obtained from the replicate molecular dynamics simulation. Drug resistance ensembles are shaded in red while the susceptible ones are in grey.

| <b>Supplementary Table S3: Mutations present in each drug resistance ensemble (according to the 2017 update)</b>                                                                                                                                                                                                                                                                                                                                                                                  |
|---------------------------------------------------------------------------------------------------------------------------------------------------------------------------------------------------------------------------------------------------------------------------------------------------------------------------------------------------------------------------------------------------------------------------------------------------------------------------------------------------|
| <b>ATV</b>                                                                                                                                                                                                                                                                                                                                                                                                                                                                                        |
| 4S, <b>10IVF</b> , 11LI, 12I, 13VM, 14R, 15V, 16A, 19IV, 20RIVTM, 21D, 22V, 24IM, <b>32I</b> , <b>33FV</b> , <b>34QF</b> , 35DNG, 36IV, 37DS, 41K, 43IT, <b>46LI</b> , 47V, <b>48QV</b> , 51A, <b>53L</b> , <b>54LVM</b> , 55RN, 57K, 58E, <b>60E</b> , 61HDN, <b>62V</b> , 63P, <b>64VM</b> , 66V, 67YFE, 69RYQ, 70E, <b>71IV</b> , 72LTVMF, <b>73STA</b> , 74PS, 75I, 76V, 77I, 79SA, 82LSTA, 83D, <b>84VA</b> , 89V, <b>90M</b> , 91S, 92K, <b>93LM</b> , 95F, 96S                             |
| <b>DRV</b>                                                                                                                                                                                                                                                                                                                                                                                                                                                                                        |
| 10IFV, <b>11LI</b> , 12KPA, 13V, 14R, 15V, 16A, 19QV, 20RTVM, 24M, 30N, <b>32I</b> , <b>33F</b> , 34Q, 35DG, 36IVT, 37QDT, 43IQT, 46LI, <b>47V</b> , 51A, 53L, <b>54LM</b> , 55RN, 57KG, 58E, 60E, 62V, 63P, 64VM, 66V, 67WY, 69Q, 71IV, 72LVM, 73STA, 77IT, 79S, 82LA, <b>84V</b> , 85L, 88D, <b>89V</b> , 90M, 91S, 92K, 93L                                                                                                                                                                    |
| <b>FPV</b>                                                                                                                                                                                                                                                                                                                                                                                                                                                                                        |
| <b>10IVF</b> , 11I, 12KDPV, 13V, 14RT, 15V, 16A, 19QTI, 20RITVM, 24M, 30N, <b>32I</b> , 33F, 35KDNG, 36LI, 37HDQTP, 41K, 43IT, <b>46LI</b> , <b>47V</b> , 48Q, 53L, <b>54LVM</b> , 55RN, 57KG, 58E, 60E, 61DN, 62V, 63P, 64LV, 66FV, 67YGF, 68E, 69KLQ, 70TE, 71LIVT, 72LTM, <b>73ST</b> , 74PS, <b>76V</b> , 77IT, 79SA, <b>82LTA</b> , <b>84VA</b> , 87G, 88D, 89VM, <b>90M</b> , 91S, 92KR, 93L, 95F                                                                                           |
| <b>IDV</b>                                                                                                                                                                                                                                                                                                                                                                                                                                                                                        |
| 4A, 7R, <b>10IVF</b> , 11I, 12KP, 13VM, 15V, 19QIPT, <b>20RIT</b> , 21D, 22V, 24M, <b>32I</b> , 33IF, 34TQ, 35DNG, <b>36LI</b> , 37SDE, 41K, 43TE, <b>46LI</b> , 47V, 48LVM, 50V, 53LY, <b>54TVSACM</b> , 57K, 58E, 60NE, 61HNE, 62V, 63P, 64VM, 66VF, 67FE, 68E, 69RYQ, <b>71TV</b> , 72LTV, <b>73CSTA</b> , 74DS, 75I, <b>76V</b> , <b>77I</b> , <b>82SFTA</b> , 83D, <b>84VA</b> , 85V, 89V, <b>90M</b> , 92K, 93L                                                                             |
| <b>LPV</b>                                                                                                                                                                                                                                                                                                                                                                                                                                                                                        |
| <b>10IVF</b> , 11LI, 12KP, 13V, 14R, 15V, 16A, 19IPQV, <b>20RTVM</b> , <b>24I</b> , 30N, <b>32I</b> , <b>33FV</b> , 34TQ, 35DAG, 36I, 37EDQTS, 41K, 43QITE, 45R, <b>46LI</b> , <b>47VA</b> , 48V, <b>50V</b> , 51A, <b>53L</b> , <b>54LTVMS</b> , 55RN, 57K, 58E, 60E, 61HE, 62V, <b>63P</b> , 64VM, 65D, 66VF, 67Y, 68E, 69Y, 70E, <b>71IVT</b> , 72TVM, <b>73CSTA</b> , 74PAS, 75I, <b>76V</b> , 77IT, 79S, <b>82SFTAI</b> , <b>84V</b> , 85LV, 87G, 88D, 89TV, <b>90M</b> , 91S, 92K, 93L, 95F |
| <b>NFV</b>                                                                                                                                                                                                                                                                                                                                                                                                                                                                                        |
| 7R, <b>10IVF</b> , 11LI, 12IA, 13V, 15V, 16E, 18H, 19I, 20RIVT, 21D, 22V, 24M, <b>30N</b> , 33IVFM, 35DNG, <b>36I</b> , 37DSTE, 38F, 41K, 43TN, 45R, <b>46LI</b> , 48M, 53L, 54VM, 55R, 57K, 58E, 60E, 61HNE, 62V, 63PT, 64V, 65D, 66VF, 67W, 68E, 69R, <b>71TVI</b> , 72LTV, 73STA, <b>77I</b> , <b>82FA</b> , 83D, <b>84VA</b> , 85V, <b>88D</b> , <b>90M</b> , 93L                                                                                                                             |
| <b>SQV</b>                                                                                                                                                                                                                                                                                                                                                                                                                                                                                        |
| <b>10IF</b> , 11LI, 12IP, 13VM, 15V, 18H, 19I, 20RIVT, 21D, 22V, 24M, 32I, 33IVF, 34D, 35DNG, 36IV, 37DS, 41K, 43T, 46LI, <b>48QV</b> , 53L, <b>54LVM</b> , 55R, 57K, 58E, 60E, 61HN, <b>62V</b> , 63PE, 64V, 66FV, 67WFE, 69Q, <b>71TVI</b> , 72LTVM, <b>73ST</b> , 74SP, 75I, 76V, <b>77I</b> , 79A, <b>82A</b> , 83D, <b>84VA</b> , 85V, 89V, <b>90M</b> , 91S, 92K, 93LM, 95V                                                                                                                 |
| <b>TPV</b>                                                                                                                                                                                                                                                                                                                                                                                                                                                                                        |
| <b>10IV</b> , 11LI, 12K, 13V, 14R, 15V, 16A, 19V, 20RTV, 21D, 22V, 24IM, 32I, <b>33F</b> , 34QDF, 35DG, <b>36IV</b> , 37D, <b>43T</b> , 45R, <b>46LI</b> , <b>47V</b> , 53L, <b>54LVM</b> , 55R, 57K, <b>58E</b> , 60E, 61HN, 62V, 63P, 64V, 66V, 70T, 71IVM, 72TVM, 73ST, <b>74P</b> , 77I, <b>82LTA</b> , <b>83D</b> , <b>84V</b> , 85L, 87G, <b>89VM</b> , 90M, 91S, 93LM                                                                                                                      |

**Supplementary Figure 4:** Normalized degree centralities for protease inhibitor complexes for replicate MD runs.

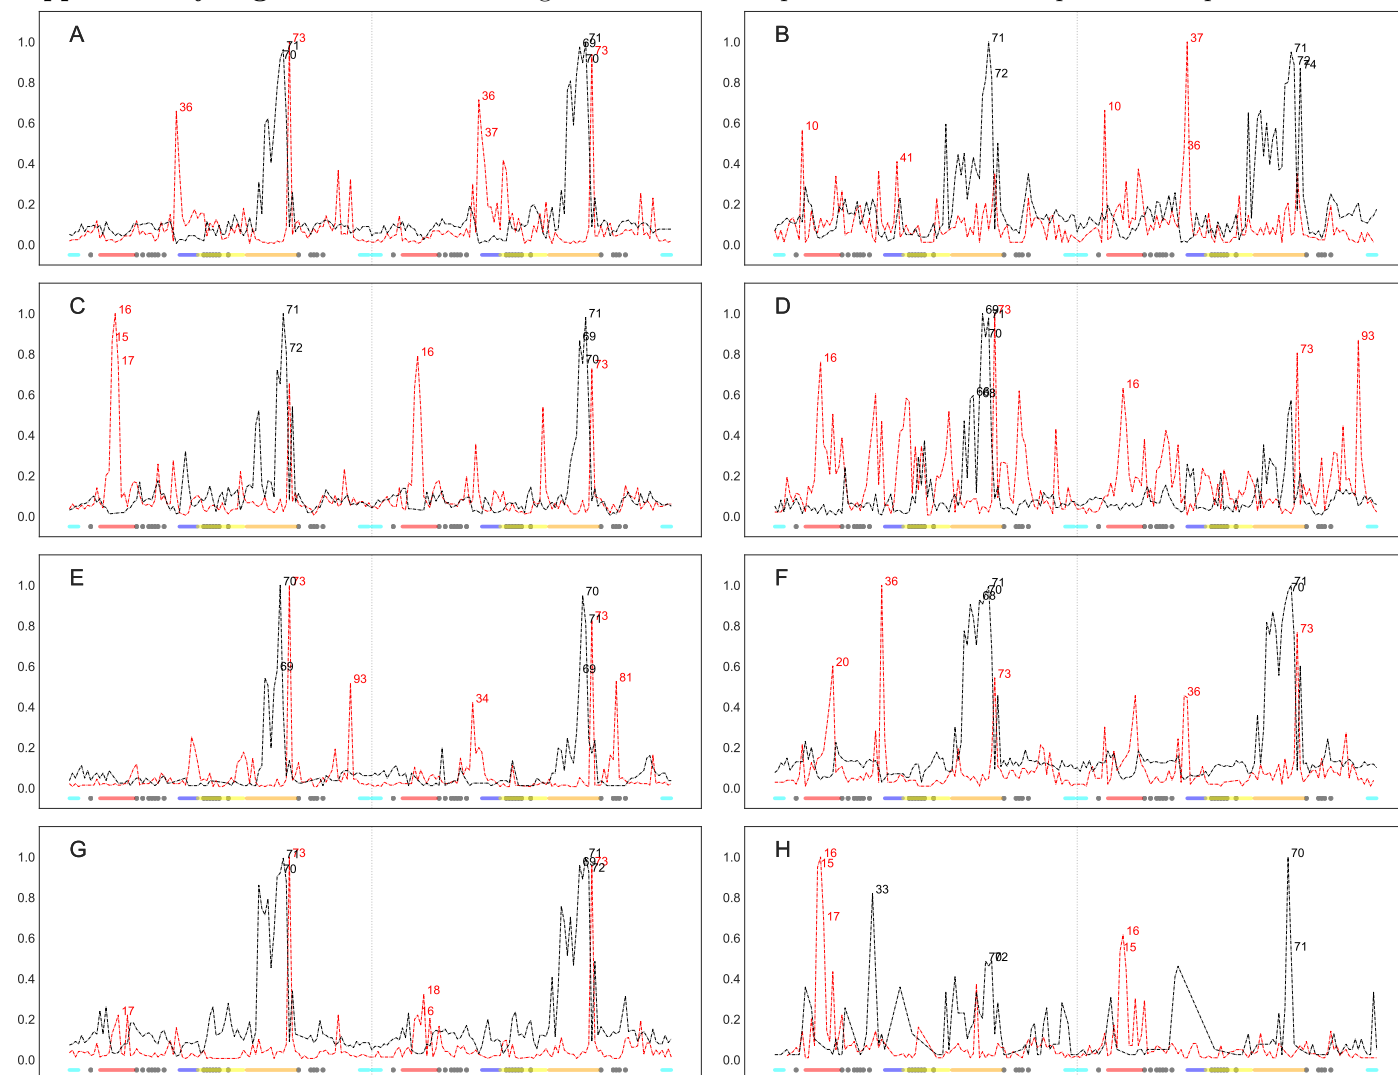

**Figure. S4:** Normalized degree centralities for replicate molecular dynamics simulations, showing significantly larger (red lines) and smaller (black lines) distances observed in resistant ensembles for 8 FDA-approved protease inhibitor complexes, namely ATV (A), DRV (B), FPV (C), IDV (D), LPV (E), NFV (F), SQV (G) and TPV (H). The top 5 residue positions with the highest connectivities are labelled at the peaks in each graph. Inserted underneath are the functional protease residues depicted as colored dots, namely the fulcrum (red), the elbow (blue), the flap (yellow), the cantilever (orange), the interface (cyan) and the binding cavity residues (grey).

**Supplementary dataset S5:** HIV protease sequences used for the ensembles. Sequence headers consist of the sequence IDs and the fold resistance scores. An additional number is appended after an underscore as an internal representation of the mutant after sequence expansion.

**Sequences for the ATV-resistant ensemble**

>105312\_1 700.0  
PQITLWQRPVLTVKIGGQLKEALLDTGADDTVFEEMDLP GKWKPKLIGGIGGFVVRVRYEDIPIEICGYKVTSPVLIG  
PTPTNVIGRNVMTKIGCTLNF

>105312\_3 700.0  
PQITLWQRPVLTVKIGGQLKEALLDTGADDTVFEEDLPGKWKPKLIGGIGGFVVRVRYEDIPIEICGYKVTSPVLIG  
PTPTNVIGRNVMTKIGCTLNF

>105312\_5 700.0  
PQITLWQRPVLTVRIGGQLKEALLDTGADDTVFEEMDLP GKWKPKLIGGIGGFVVRVRYEDIPIEICGYKVTSPVLIG  
PTPTNVIGRNVMTKIGCTLNF

>105312\_7 700.0  
PQITLWQRPVLTVRIGGQLKEALLDTGADDTVFEEDLPGKWKPKLIGGIGGFVVRVRYEDIPIEICGYKVTSPVLIG  
PTPTNVIGRNVMTKIGCTLNF

>117039\_2 700.0  
PQITLWQRPVITVKIGGQLVEALMDTGADDTIFEGINLPGRWPKPKMIGGIGGFLNVRQYEQIPIEICGHKILSTVLVG  
STPVNVIGRNVMSKIGCTLNF

>117075\_0 700.0  
PQITLWQRPLITVKIGGQLVEALMDTGADDTIFEGINLPGRWPKPKMIGGIGGFLNVRQYEQIPIEICGHKILSTVLVG  
STPLNVIGRNVMSKIGCTLNF

>117075\_11 700.0  
PQITLWQRPVITVKVGGQLVEALMDTGADDTIFEGINLPGRWPKPKMIGGIGGFLNVREYEQIPIEICGHKILSTVLVG  
STPLNVIGRNVMSKIGCTLNF

>105312\_4 700.0  
PQITLWQRPVLTVRIGGQLKEALLDTGADDTVFEEMDLP GKWKPKLIGGIGGFVVRVRYEDIPIEICGHKVTSPVLIG  
PTPTNVIGRNVMTKIGCTLNF

>105312\_6 700.0  
PQITLWQRPVLTVRIGGQLKEALLDTGADDTVFEEDLPGKWKPKLIGGIGGFVVRVRYEDIPIEICGHKVTSPVLIG  
PTPTNVIGRNVMTKIGCTLNF

>115755\_0 700.0  
PQITLWQRPIVTIKVGGQIMEALIDTGADDTVLEDINLPGRWPKPKMIQGIGGLVKVRQYDQIPIEICGHEVMSTVLVG  
PTPANIIGRNLTTQIGCTLNF

>115755\_1 700.0  
PQITLWQRPIVTIKVGGQIMEALIDTGADDTVLEDINLPGRWPKPKMIQGIGGLVKVRQYDQIPIEICGHEVMSTVLVG  
PTPANIIGRNLTTQMGCTLNF

>115755\_2 700.0  
PQITLWQRPIVTIKVGGQIMEALIDTGADDTVLEDINLPGRWPKPKMIQGIGGLVKVRQYDQIPIEICGHEVMSTILVG  
PTPANIIGRNLTTQIGCTLNF

>115755\_3 700.0  
PQITLWQRPIVTIKVGGQIMEALIDTGADDTVLEDINLPGRWPKPKMIQGIGGLVKVRQYDQIPIEICGHEVMSTILVG  
PTPANIIGRNLTTQMGCTLNF

>143473\_17 700.0  
PQITLWQRPIVIVKIGGQLREALLDTGADDTVLEDINLPGRWTPKLIGGIGGFVKVRQYDQVPIEICGHKITSTVLVG  
PTPANIIGRNLMTQLGCTLNF

>143473\_19 700.0  
PQITLWQRPIVIVKIGGQLREALLDTGADDTVLEDINLPGRWTPKLIGGIGGFVKVRQYDQVPIEICGHKVTSTVLVG  
PTPANIIGRNLMTQLGCTLNF

>143473\_21 700.0  
PQITLWQRPIVIVKIGGQLREALLDTGADDTVLEDINLPGRWTPKLIGGIGGFVVRVRYDQVPIEICGHKITSTVLVG  
PTPANIIGRNLMTQLGCTLNF

>143473\_23 700.0  
PQITLWQRPIVIVKIGGQLREALLDTGADDTVLEDINLPGRWTPKLIGGIGGFVVRVRYDQVPIEICGHKVTSTVLVG  
PTPANIIGRNLMTQLGCTLNF

>143473\_27 700.0  
PQITLWQRPIVIVKIGGQIREALLDTGADDTVLEDINLPGRWTPKLIGGIGGFVKVRQYDQVPIEICGHKVTSTVLVG  
PTPANIIGRNLMTQLGCTLNF

>98601\_0 700.0  
PQITLWQRPFVTIKIGGQLIEALLDTGADDTVLEEMNLPGRWPKPKIIGGIGGFVKVRQYDQIPIEICGHKVTSTVLIG  
PTPVNAIGRNLTTQIGCTLNF

>98604\_0 700.0

PQITLWQRPFVTIKIGGQLIEALLDTGADDTVLEEMNLPGRWKPKIIGGIGGFVKVRQYDQIPIEICGHKVISTVLVG  
PTPVNAIGRNLLTQIGCTLNF  
>98604\_1 700.0  
PQITLWQRPFVTIKIGGQLIEALLDTGADDTVLEEINLPGRWKPKIIGGIGGFVKVRQYDQIPIEICGHKVISTVLVG  
PTPVNAIGRNLLTQIGCTLNF  
>123049\_0 700.0  
PQITLWQRPIITIKIGGQLKDVLMMDTGADDTVLEDIDLPGRWKPKLIGGIGGFVKVRQYDHPVEVCGHKVTTTTVLVG  
PTPVDVIGRNLLTQIGCTLNF  
>123049\_1 700.0  
PQITLWQRPIITIKIGGQLKDVLMMDTGADDTVLEDIDLPGRWKPKLIGGIGGFVKVRQYDNPVEVCGHKVTTTTVLVG  
PTPVDVIGRNLLTQIGCTLNF  
>123049\_2 700.0  
PQITLWQRPIITIKIGGQLKDVLMMDTGADDTVLEDIDLPGRWKPKLIGGIGGFVKVKQYDHPVEVCGHKVTTTTVLVG  
PTPVDVIGRNLLTQIGCTLNF  
>123049\_3 700.0  
PQITLWQRPIITIKIGGQLKDVLMMDTGADDTVLEDIDLPGRWKPKLIGGIGGFVKVKQYDNPVEVCGHKVTTTTVLVG  
PTPVDVIGRNLLTQIGCTLNF  
>123049\_4 700.0  
PQITLWQRPIITIKIGGQLKDVLMMDTGADDTVLEDIDLPGKWKPKLIGGIGGFVKVRQYDHPVEVCGHKVTTTTVLVG  
PTPVDVIGRNLLTQIGCTLNF  
>123049\_5 700.0  
PQITLWQRPIITIKIGGQLKDVLMMDTGADDTVLEDIDLPGKWKPKLIGGIGGFVKVRQYDNPVEVCGHKVTTTTVLVG  
PTPVDVIGRNLLTQIGCTLNF  
>123049\_6 700.0  
PQITLWQRPIITIKIGGQLKDVLMMDTGADDTVLEDIDLPGKWKPKLIGGIGGFVKVKQYDHPVEVCGHKVTTTTVLVG  
PTPVDVIGRNLLTQIGCTLNF  
>123049\_7 700.0  
PQITLWQRPIITIKIGGQLKDVLMMDTGADDTVLEDIDLPGKWKPKLIGGIGGFVKVKQYDNPVEVCGHKVTTTTVLVG  
PTPVDVIGRNLLTQIGCTLNF  
>123049\_8 700.0  
PQITLWQRPIITIKIGGQLKDVLMMDTGADDTVLENIDLPGRWKPKLIGGIGGFVKVRQYDHPVEVCGHKVTTTTVLVG  
PTPVDVIGRNLLTQIGCTLNF  
>123049\_9 700.0  
PQITLWQRPIITIKIGGQLKDVLMMDTGADDTVLENIDLPGRWKPKLIGGIGGFVKVRQYDNPVEVCGHKVTTTTVLVG  
PTPVDVIGRNLLTQIGCTLNF  
>123049\_10 700.0  
PQITLWQRPIITIKIGGQLKDVLMMDTGADDTVLENIDLPGRWKPKLIGGIGGFVKVKQYDHPVEVCGHKVTTTTVLVG  
PTPVDVIGRNLLTQIGCTLNF  
>123049\_11 700.0  
PQITLWQRPIITIKIGGQLKDVLMMDTGADDTVLENIDLPGRWKPKLIGGIGGFVKVKQYDNPVEVCGHKVTTTTVLVG  
PTPVDVIGRNLLTQIGCTLNF  
>123049\_12 700.0  
PQITLWQRPIITIKIGGQLKDVLMMDTGADDTVLENIDLPGKWKPKLIGGIGGFVKVRQYDHPVEVCGHKVTTTTVLVG  
PTPVDVIGRNLLTQIGCTLNF  
>123049\_13 700.0  
PQITLWQRPIITIKIGGQLKDVLMMDTGADDTVLENIDLPGKWKPKLIGGIGGFVKVRQYDNPVEVCGHKVTTTTVLVG  
PTPVDVIGRNLLTQIGCTLNF  
>123049\_15 700.0  
PQITLWQRPIITIKIGGQLKDVLMMDTGADDTVLENIDLPGKWKPKLIGGIGGFVKVKQYDNPVEVCGHKVTTTTVLVG  
PTPVDVIGRNLLTQIGCTLNF  
>107987\_0 700.0  
PQISLWQRPLITVKIGGQVIEALLDTGADDTVVEDINLPGRWKPKIIGGIGGFVRVKQYDQIPVEIFGRKIFTTVLVG  
ATPVNVIGRNLMTQLGCSLNF  
>107987\_1 700.0  
PQISLWQRPLITVKIGGQVIEALLDTGADDTVVEDINLPGRWKPKIIGGIGGFVRVKQYDQIPVEIFGRKIFTTVLVG  
ATPLNVIGRNLMTQLGCSLNF  
>107987\_2 700.0  
PQISLWQRPLITVKIGGQVIEALLDTGADDTVVEDINLPGRWKPKLIGGIGGFVRVKQYDQIPVEIFGRKIFTTVLVG  
ATPVNVIGRNLMTQLGCSLNF  
>107987\_3 700.0  
PQISLWQRPLITVKIGGQVIEALLDTGADDTVVEDINLPGRWKPKLIGGIGGFVRVKQYDQIPVEIFGRKIFTTVLVG  
ATPLNVIGRNLMTQLGCSLNF  
>107987\_4 700.0

PQISLWQRPLITVKIGGQVIEALLDTGADDTVVEDISLPGRWKPKIIGGIGGFVRVKQYDQIPVEIFGRKIFTTVLVG  
ATPVNVIGRNLMTQLGCSLNF  
>107987\_5 700.0  
PQISLWQRPLITVKIGGQVIEALLDTGADDTVVEDISLPGRWKPKIIGGIGGFVRVKQYDQIPVEIFGRKIFTTVLVG  
ATPLNVIGRNLMTQLGCSLNF  
>107987\_6 700.0  
PQISLWQRPLITVKIGGQVIEALLDTGADDTVVEDISLPGRWKPKLIGGIGGFVRVKQYDQIPVEIFGRKIFTTVLVG  
ATPVNVIGRNLMTQLGCSLNF  
>107987\_7 700.0  
PQISLWQRPLITVKIGGQVIEALLDTGADDTVVEDISLPGRWKPKLIGGIGGFVRVKQYDQIPVEIFGRKIFTTVLVG  
ATPLNVIGRNLMTQLGCSLNF  
>107987\_8 700.0  
PQISLWQRPLITVKIGGQVVEALLDTGADDTVVEDINLPGRWKPKIIGGIGGFVRVKQYDQIPVEIFGRKIFTTVLVG  
ATPVNVIGRNLMTQLGCSLNF  
>107987\_9 700.0  
PQISLWQRPLITVKIGGQVVEALLDTGADDTVVEDINLPGRWKPKIIGGIGGFVRVKQYDQIPVEIFGRKIFTTVLVG  
ATPLNVIGRNLMTQLGCSLNF  
>107987\_10 700.0  
PQISLWQRPLITVKIGGQVVEALLDTGADDTVVEDINLPGRWKPKLIGGIGGFVRVKQYDQIPVEIFGRKIFTTVLVG  
ATPVNVIGRNLMTQLGCSLNF  
>107987\_11 700.0  
PQISLWQRPLITVKIGGQVVEALLDTGADDTVVEDINLPGRWKPKLIGGIGGFVRVKQYDQIPVEIFGRKIFTTVLVG  
ATPLNVIGRNLMTQLGCSLNF  
>107987\_12 700.0  
PQISLWQRPLITVKIGGQVVEALLDTGADDTVVEDISLPGRWKPKIIGGIGGFVRVKQYDQIPVEIFGRKIFTTVLVG  
ATPVNVIGRNLMTQLGCSLNF  
>107987\_13 700.0  
PQISLWQRPLITVKIGGQVVEALLDTGADDTVVEDISLPGRWKPKIIGGIGGFVRVKQYDQIPVEIFGRKIFTTVLVG  
ATPLNVIGRNLMTQLGCSLNF  
>107987\_14 700.0  
PQISLWQRPLITVKIGGQVVEALLDTGADDTVVEDISLPGRWKPKLIGGIGGFVRVKQYDQIPVEIFGRKIFTTVLVG  
ATPVNVIGRNLMTQLGCSLNF  
>107987\_15 700.0  
PQISLWQRPLITVKIGGQVVEALLDTGADDTVVEDISLPGRWKPKLIGGIGGFVRVKQYDQIPVEIFGRKIFTTVLVG  
ATPLNVIGRNLMTQLGCSLNF  
>113050\_0 700.0  
PQITLWQRPFVTVKIGGQITEALLDTGADDTILENINLPGRWKPKIIQGIGGFLKVRQYDQIPIEIEGHKVIKSVVVG  
PTPVNVIGRNVMSQLGCTLNF  
>115739\_0 700.0  
PQITLWQRPVVTVKVGGLREALLDTGADDTIFEDISLPGWPKIVGGIGGLIKVKQYDQIPIEICGHKVISTTVLVG  
PTPANIIGRNLMTQLGCTLNF  
>115739\_1 700.0  
PQITLWQRPVVTVKVGGLREALLDTGADDTIFEDISLPGWPKIVGGIGGLIKVKQYDQIPIEICGHKVISTTVLVG  
PTPANIIGRNLMTQLGFTLNF  
>113192\_1 700.0  
PQITLWQRPFVVMKIGGQLIEALLDTGADDTVLEEISLPGRWKPKIIGGIGGFVKVRQYDQVPIEVFGHKATTTVLVG  
PTPVNVIGRNLMTQLGCTLNF  
>113192\_3 700.0  
PQITLWQRPFVVMKIGGQLIEALLDTGADDTVLEEISLPGRWKPKIIGGIGGFVKVRQYDQVPIEVFGQKATTTVLVG  
PTPVNVIGRNLMTQLGCTLNF  
>113192\_5 700.0  
PQITLWQRPFVVMKIGGQLIEALLDTGADDTVLEEISLPGRWKPKIIGGIGGFVKVRQYDQVPIEVFGHKATTTVLVG  
PTPVNVIGRNLMTQLGCTLNF  
>113192\_7 700.0  
PQITLWQRPFVVMKIGGQLIEALLDTGADDTVLEEISLPGRWKPKIIGGIGGFVKVRQYDQVPIEVFGQKATTTVLVG  
PTPVNVIGRNLMTQLGCTLNF  
>113192\_9 700.0  
PQITLWQRPFVVMKIGGQIEALLDTGADDTVLEEISLPGRWKPKIIGGIGGFVKVRQYDQVPIEVFGHKATTTVLVG  
PTPVNVIGRNLMTQLGCTLNF  
>113192\_11 700.0  
PQITLWQRPFVVMKIGGQIEALLDTGADDTVLEEISLPGRWKPKIIGGIGGFVKVRQYDQVPIEVFGQKATTTVLVG  
PTPVNVIGRNLMTQLGCTLNF  
>113192\_13 700.0

PQITLWQRPFVMTKIGGQIEALLDTGADDTVLEEISLPGRWKPKIIGGIGGFVKVRQYDQVPVEVFGHKATTTVLVG  
PTPVNVIGRNLMTQLGCTLNF  
>113192\_15 700.0  
PQITLWQRPFVMTKIGGQIEALLDTGADDTVLEEISLPGRWKPKIIGGIGGFVKVRQYDQVPVEVFGQKATTTVLVG  
PTPVNVIGRNLMTQLGCTLNF  
>143473\_16 700.0  
PQITLWQRPVIVKIGGQLREALLDTGADDTVFEEDIDLPGRWTPKLIGGIGGFVKVRQYDQVPIEICGHKIISTVLVG  
PTPANIIGRNLMTQLGCTLNF  
>143473\_18 700.0  
PQITLWQRPVIVKIGGQLREALLDTGADDTVFEEDIDLPGRWTPKLIGGIGGFVKVRQYDQVPIEICGHKVISTVLVG  
PTPANIIGRNLMTQLGCTLNF  
>143473\_20 700.0  
PQITLWQRPVIVKIGGQLREALLDTGADDTVFEEDIDLPGRWTPKLIGGIGGFVVRVQYDQVPIEICGHKIISTVLVG  
PTPANIIGRNLMTQLGCTLNF  
>143473\_22 700.0  
PQITLWQRPVIVKIGGQLREALLDTGADDTVFEEDIDLPGRWTPKLIGGIGGFVVRVQYDQVPIEICGHKVISTVLVG  
PTPANIIGRNLMTQLGCTLNF  
>143473\_24 700.0  
PQITLWQRPVIVKIGGQIREALLDTGADDTVFEEDIDLPGRWTPKLIGGIGGFVKVRQYDQVPIEICGHKIISTVLVG  
PTPANIIGRNLMTQLGCTLNF  
>143473\_26 700.0  
PQITLWQRPVIVKIGGQIREALLDTGADDTVFEEDIDLPGRWTPKLIGGIGGFVKVRQYDQVPIEICGHKVISTVLVG  
PTPANIIGRNLMTQLGCTLNF  
>143473\_28 700.0  
PQITLWQRPVIVKIGGQIREALLDTGADDTVFEEDIDLPGRWTPKLIGGIGGFVVRVQYDQVPIEICGHKIISTVLVG  
PTPANIIGRNLMTQLGCTLNF  
>143473\_30 700.0  
PQITLWQRPVIVKIGGQIREALLDTGADDTVFEEDIDLPGRWTPKLIGGIGGFVVRVQYDQVPIEICGHKVISTVLVG  
PTPANIIGRNLMTQLGCTLNF  
>115065\_2 700.0  
PQITLWQRPVVTVKIAGQLKEALIDTGADDTIFFEMNLPGRWPKLIGGIGGFVKVRQYDQIPIEICGHKVVGTVLIG  
PTPTNVIGRNLLTQIGCTLNF  
>115065\_3 700.0  
PQITLWQRPVVTVKIAGQLKEALIDTGADDTIFFEMDLPGRWPKLIGGIGGFVKVRQYDQIPIEICGHKVVGTVLIG  
PTPTNVIGRNLLTQIGCTLNF  
>143473\_1 700.0  
PQITLWQRPVIVTKIGGQLREALLDTGADDTVFEEDIDLPGRWTPKLIGGIGGFVKVRQYDQVPIEICGHKITSTVLVG  
PTPANIIGRNLMTQLGCTLNF  
>143473\_3 700.0  
PQITLWQRPVIVTKIGGQLREALLDTGADDTVFEEDIDLPGRWTPKLIGGIGGFVKVRQYDQVPIEICGHKVSTSTVLVG  
PTPANIIGRNLMTQLGCTLNF  
>143473\_5 700.0  
PQITLWQRPVIVTKIGGQLREALLDTGADDTVFEEDIDLPGRWTPKLIGGIGGFVVRVQYDQVPIEICGHKITSTVLVG  
PTPANIIGRNLMTQLGCTLNF  
>143473\_7 700.0  
PQITLWQRPVIVTKIGGQLREALLDTGADDTVFEEDIDLPGRWTPKLIGGIGGFVVRVQYDQVPIEICGHKVSTSTVLVG  
PTPANIIGRNLMTQLGCTLNF  
>143473\_9 700.0  
PQITLWQRPVIVTKIGGQIREALLDTGADDTVFEEDIDLPGRWTPKLIGGIGGFVKVRQYDQVPIEICGHKITSTVLVG  
PTPANIIGRNLMTQLGCTLNF  
>143473\_11 700.0  
PQITLWQRPVIVTKIGGQIREALLDTGADDTVFEEDIDLPGRWTPKLIGGIGGFVKVRQYDQVPIEICGHKVSTSTVLVG  
PTPANIIGRNLMTQLGCTLNF  
>143473\_13 700.0  
PQITLWQRPVIVTKIGGQIREALLDTGADDTVFEEDIDLPGRWTPKLIGGIGGFVVRVQYDQVPIEICGHKITSTVLVG  
PTPANIIGRNLMTQLGCTLNF  
>143473\_15 700.0  
PQITLWQRPVIVTKIGGQIREALLDTGADDTVFEEDIDLPGRWTPKLIGGIGGFVVRVQYDQVPIEICGHKVSTSTVLVG  
PTPANIIGRNLMTQLGCTLNF  
>115081\_0 700.0  
PQITLWQRPVITIKIGGQLREALLDTGADDTVLEDIDLPGRWPKLIVIGGIGGFVKVRQYEQVPIEICGHKVVGTVLIG  
PTPSNIIGRNLMTQLGCTLNF  
>113192\_0 700.0



PQITLWQRPFVMTMKIGGQLIEALLDTGADDTVLEEISLPGRWKPKIIGGIGGFVKVRQYDQVPIEVFGHKAITTVLVG  
 PTPVNVIGRNLMTQLGCTLNF  
 >113192\_2 700.0  
 PQITLWQRPFVMTMKIGGQLIEALLDTGADDTVLEEISLPGRWKPKIIGGIGGFVKVRQYDQVPIEVFGQKAITTVLVG  
 PTPVNVIGRNLMTQLGCTLNF  
 >103067\_1 700.0  
 PQITLWQRPFITVKIAGQVKEALLDTGADDTVFEEMNLPGRWIPKLIGGIAGFMKVRQYDQIPMEIYGHKVMATVLVG  
 PTPVNVIGRNLMTQIGCTLNF  
 >145212\_0 700.0  
 PQITLWQRPIVTVKIAGQLKEALLDTGADDTIFEEMNLPGRWTPKLIGGIGGFLKVRQYDQVPIEICGHKVIQVPLVG  
 PTPVNVIGRNLMMSQIGCTLNF  
 >145212\_2 700.0  
 PQITLWQRPIVTVRIAGQLKEALLDTGADDTIFEEMNLPGRWTPKLIGGIGGFLKVRQYDQVPIEICGHKVIQVPLVG  
 PTPVNVIGRNLMMSQIGCTLNF  
 >145212\_4 700.0  
 PQITLWQRPIITVKIAGQLKEALLDTGADDTIFEEMNLPGRWTPKLIGGIGGFLKVRQYDQVPIEICGHKVIQVPLVG  
 PTPVNVIGRNLMMSQIGCTLNF  
 >145212\_6 700.0  
 PQITLWQRPIITVRIAGQLKEALLDTGADDTIFEEMNLPGRWTPKLIGGIGGFLKVRQYDQVPIEICGHKVIQVPLVG  
 PTPVNVIGRNLMMSQIGCTLNF  
 >115739\_2 700.0  
 PQITLWQRPVVTVKVGQQLREALLDTGADDTIFEDISLPGWTPKIVGGIGGLIKVKQYDQIPIEICGHKVISTVLVG  
 PTPANIIGRNLMTQLGCTLNF  
 >115739\_3 700.0  
 PQITLWQRPVVTVKVGQQLREALLDTGADDTIFEDISLPGWTPKIVGGIGGLIKVKQYDQIPIEICGHKVISTVLVG  
 PTPANIIGRNLMTQLGFTLNF  
 >143473\_0 700.0  
 PQITLWQRPIVTVKIGGQLREALLDTGADDTVFEDIDLPGRWTPKLIGGIGGFVKVRQYDQVPIEICGHKIISTVLVG  
 PTPANIIGRNLMTQLGCTLNF  
 >143473\_4 700.0  
 PQITLWQRPIVTVKIGGQLREALLDTGADDTVFEDIDLPGRWTPKLIGGIGGFVVRVRYDQVPIEICGHKIISTVLVG  
 PTPANIIGRNLMTQLGCTLNF  
 >143473\_6 700.0  
 PQITLWQRPIVTVKIGGQLREALLDTGADDTVFEDIDLPGRWTPKLIGGIGGFVVRVRYDQVPIEICGHKVISTVLVG  
 PTPANIIGRNLMTQLGCTLNF  
 >143473\_8 700.0  
 PQITLWQRPIVTVKIGGQIREALLDTGADDTVFEDIDLPGRWTPKLIGGIGGFVKVRQYDQVPIEICGHKIISTVLVG  
 PTPANIIGRNLMTQLGCTLNF  
 >143473\_10 700.0  
 PQITLWQRPIVTVKIGGQIREALLDTGADDTVFEDIDLPGRWTPKLIGGIGGFVKVRQYDQVPIEICGHKVISTVLVG  
 PTPANIIGRNLMTQLGCTLNF  
 >143473\_12 700.0  
 PQITLWQRPIVTVKIGGQIREALLDTGADDTVFEDIDLPGRWTPKLIGGIGGFVVRVRYDQVPIEICGHKIISTVLVG  
 PTPANIIGRNLMTQLGCTLNF  
 >143473\_14 700.0  
 PQITLWQRPIVTVKIGGQIREALLDTGADDTVFEDIDLPGRWTPKLIGGIGGFVVRVRYDQVPIEICGHKVISTVLVG  
 PTPANIIGRNLMTQLGCTLNF  
 >115065\_0 700.0  
 PQITLWQRPVVTVKIAGQLKEALIDTGADDTIFEEMNLPGRWKPKLIGGIGGFVKVRQYDQIPIEICGHKVVGTVLIG  
 PTPTNVIGRNLLTQIGCTLNF  
 >115065\_1 700.0  
 PQITLWQRPVVTVKIAGQLKEALIDTGADDTIFEEMDLPGRWKPKLIGGIGGFVKVRQYDQIPIEICGHKVVGTVLIG  
 PTPTNVIGRNLLTQIGCTLNF

**Sequences for the ATV-susceptible ensemble**

>259249\_3 0.5  
 PQITLWQRPLVAVKIGEQLIEALLDTGADDTVLEEINLPKWKPKMIGGIGGFIKVGQYDQIPIEICGKRALGTVLVG  
 PTPVNIIGRNILTQIGCTLNF  
 >102783\_3 0.4  
 PQITLWQRPIITIKIGGQLKEALLDTGADDTVLEDMNLPGRWKPKMIGGIGGFIKVRQYDEVPLEICGHKVGTGTVLIG  
 STPVNIIGRNLLTQLGCTLNF  
 >102783\_2 0.4  
 PQITLWQRPIITIKIGGQLKEALLDTGADDTVLEDMNLPGRWKPKMIGGIGGFIKVRQYDEVPLEICGHKVGTGTVLIG

ATPVNIIGRNLLTQLGCTLNF  
>102795\_0 0.5  
PQITLWQRPVVTIKVEGQLKEALLDTGADDTVLEEMNLPGRWKPKMIGGIGGFIKVRQYDQILIEICGHKARGTVLVG  
PTPVNIIGRNLLTQIGCTLNF  
>102795\_1 0.5  
PQITLWQRPVVTIKVEGQLKEALLDTGADDTVLEEMNLPGRWKPKMIGGIGGFIKVRQYDQILIEICGHKARGTVLVG  
PTPVNIIGRNLLTQIGCTLNF  
>102795\_4 0.5  
PQITLWQRPVVTIKVEGQLKEALLDTGADDTVLEEMNLPGRWKPKMIGGLGGFIKVRQYDQILIEICGHKARGTVLVG  
PTPVNIIGRNLLTQIGCTLNF  
>102795\_5 0.5  
PQITLWQRPVVTIKVEGQLKEALLDTGADDTVLEEMNLPGRWKPKMIGGLGGFIKVRQYDQILIEICGHKARGTVLVG  
PTPVNIIGRNLLTQIGCTLNF  
>235727\_0 0.5  
PQITLWQRPLVPVKIGGQLKEALLDTGADDTVLEEMDLPGRWKPKMIGGIGGFIKVGQYDQIQVDICGHKAIGTVLVG  
PTPVNIIGRNLLTQIGCTLNF  
>235727\_1 0.5  
PQITLWQRPLVPVRIGGQLKEALLDTGADDTVLEEMDLPGRWKPKMIGGIGGFIKVGQYDQIQVDICGHKAIGTVLVG  
PTPVNIIGRNLLTQIGCTLNF  
>235727\_2 0.5  
PQITLWQRPVVPVKIGGQLKEALLDTGADDTVLEEMDLPGRWKPKMIGGIGGFIKVGQYDQIQVDICGHKAIGTVLVG  
PTPVNIIGRNLLTQIGCTLNF  
>235727\_3 0.5  
PQITLWQRPVVPVRIGGQLKEALLDTGADDTVLEEMDLPGRWKPKMIGGIGGFIKVGQYDQIQVDICGHKAIGTVLVG  
PTPVNIIGRNLLTQIGCTLNF  
>102783\_1 0.4  
PQITLWQRPIITIKIGGQLKEALLDTGADDTVLEDMNLPGRWKPKMIGGIGGFIKVRQYDEVPLEICGHKVTGTVLIG  
STPVNIIGRNLLTQLGCTLNF  
>102783\_0 0.4  
PQITLWQRPIITIKIGGQLKEALLDTGADDTVLEDMNLPGRWKPKMIGGIGGFIKVRQYDEVPLEICGHKVTGTVLIG  
ATPVNIIGRNLLTQLGCTLNF  
>109470\_1 0.5  
PQITLWQRPLVTIKIGGQLKEALLDTGADDTVLEEMNLPGRWKPKMIEGIGGFIKVRQYDEISIDICGHKAVGTVLIG  
PTPVNIIGRNLLTQIGCTLNF  
>187159\_1 0.5  
PQITLWQRPLVTIKVGGQLKEALLDTGADDTVLEEMCLPGRWKPKMIGGIGGFIKVRQYDQILIEICGHKVIGTVLIG  
PTPVNIIGRNLLTQIGCTLNF  
>187159\_5 0.5  
PQITLWQRPLVTIKVGGQLKEALLDTGADDTVLEEMCLPGRWKPKMIGGIGGFIKVRQYDQLLIEICGHKVIGTVLIG  
PTPVNIIGRNLLTQIGCTLNF  
>187159\_9 0.5  
PQITLWQRPLVTIKVGGQLKEALLDTGADDTVLEEMCLPGKWKPKMIGGIGGFIKVRQYDQILIEICGHKVIGTVLIG  
PTPVNIIGRNLLTQIGCTLNF  
>187159\_13 0.5  
PQITLWQRPLVTIKVGGQLKEALLDTGADDTVLEEMCLPGKWKPKMIGGIGGFIKVRQYDQLLIEICGHKVIGTVLIG  
PTPVNIIGRNLLTQIGCTLNF  
>187159\_17 0.5  
PQITLWQRPLVTIKVGGQLKEALLDTGADDTVLEDMCLPGRWKPKMIGGIGGFIKVRQYDQILIEICGHKVIGTVLIG  
PTPVNIIGRNLLTQIGCTLNF  
>187159\_21 0.5  
PQITLWQRPLVTIKVGGQLKEALLDTGADDTVLEDMCLPGRWKPKMIGGIGGFIKVRQYDQLLIEICGHKVIGTVLIG  
PTPVNIIGRNLLTQIGCTLNF  
>187159\_25 0.5  
PQITLWQRPLVTIKVGGQLKEALLDTGADDTVLEDMCLPGKWKPKMIGGIGGFIKVRQYDQILIEICGHKVIGTVLIG  
PTPVNIIGRNLLTQIGCTLNF  
>187159\_29 0.5  
PQITLWQRPLVTIKVGGQLKEALLDTGADDTVLEDMCLPGKWKPKMIGGIGGFIKVRQYDQLLIEICGHKVIGTVLIG  
PTPVNIIGRNLLTQIGCTLNF  
>187159\_33 0.5  
PQITLWQRPLVTIKVGGQLKEALLDTGADDTVLEEMCLPGRWKPKMIGGIGGFIKVRQYDQILIEICGHKVIGTVLIG  
PTPVNIIGRNLLTQIGCTLNF  
>187159\_37 0.5  
PQITLWQRPLVTIKVGGQLKEALLDTGADDTVLEEMCLPGRWKPKMIGGIGGFIKVRQYDQLLIEICGHKVIGTVLIG

PTPVNIIGRNLLTQIGCTLNF  
>187159\_41 0.5  
PQITLWQRPLVTVKVGQQLKEALLDTGADDTVLEEMCLPGKWKPKMIGGIGGFIKVRQYDQILIEICGHKVIGTVLIG  
PTPVNIIGRNLLTQIGCTLNF  
>187159\_45 0.5  
PQITLWQRPLVTVKVGQQLKEALLDTGADDTVLEEMCLPGKWKPKMIGGIGGFIKVRQYDQLLIEICGHKVIGTVLIG  
PTPVNIIGRNLLTQIGCTLNF  
>187159\_49 0.5  
PQITLWQRPLVTVKVGQQLKEALLDTGADDTVLEDMCLPGRWKPKMIGGIGGFIKVRQYDQILIEICGHKVIGTVLIG  
PTPVNIIGRNLLTQIGCTLNF  
>187159\_53 0.5  
PQITLWQRPLVTVKVGQQLKEALLDTGADDTVLEDMCLPGRWKPKMIGGIGGFIKVRQYDQLLIEICGHKVIGTVLIG  
PTPVNIIGRNLLTQIGCTLNF  
>187159\_57 0.5  
PQITLWQRPLVTVKVGQQLKEALLDTGADDTVLEDMCLPGKWKPKMIGGIGGFIKVRQYDQILIEICGHKVIGTVLIG  
PTPVNIIGRNLLTQIGCTLNF  
>187159\_69 0.5  
PQITLWQRPIVTIKVGGQQLKEALLDTGADDTVLEEMCLPGRWKPKMIGGIGGFIKVRQYDQLLIEICGHKVIGTVLIG  
PTPVNIIGRNLLTQIGCTLNF  
>187159\_73 0.5  
PQITLWQRPIVTIKVGGQQLKEALLDTGADDTVLEEMCLPGKWKPKMIGGIGGFIKVRQYDQILIEICGHKVIGTVLIG  
PTPVNIIGRNLLTQIGCTLNF  
>187159\_77 0.5  
PQITLWQRPIVTIKVGGQQLKEALLDTGADDTVLEEMCLPGKWKPKMIGGIGGFIKVRQYDQLLIEICGHKVIGTVLIG  
PTPVNIIGRNLLTQIGCTLNF  
>187159\_81 0.5  
PQITLWQRPIVTIKVGGQQLKEALLDTGADDTVLEEMCLPGKWKPKMIGGIGGFIKVRQYDQILIEICGHKVIGTVLIG  
PTPVNIIGRNLLTQIGCTLNF  
>187159\_85 0.5  
PQITLWQRPIVTIKVGGQQLKEALLDTGADDTVLEDMCLPGRWKPKMIGGIGGFIKVRQYDQLLIEICGHKVIGTVLIG  
PTPVNIIGRNLLTQIGCTLNF  
>187159\_89 0.5  
PQITLWQRPIVTIKVGGQQLKEALLDTGADDTVLEDMCLPGKWKPKMIGGIGGFIKVRQYDQILIEICGHKVIGTVLIG  
PTPVNIIGRNLLTQIGCTLNF  
>187159\_93 0.5  
PQITLWQRPIVTIKVGGQQLKEALLDTGADDTVLEDMCLPGKWKPKMIGGIGGFIKVRQYDQLLIEICGHKVIGTVLIG  
PTPVNIIGRNLLTQIGCTLNF  
>187159\_97 0.5  
PQITLWQRPIVTVKVGQQLKEALLDTGADDTVLEEMCLPGRWKPKMIGGIGGFIKVRQYDQILIEICGHKVIGTVLIG  
PTPVNIIGRNLLTQIGCTLNF  
>187159\_101 0.5  
PQITLWQRPIVTVKVGQQLKEALLDTGADDTVLEEMCLPGRWKPKMIGGIGGFIKVRQYDQLLIEICGHKVIGTVLIG  
PTPVNIIGRNLLTQIGCTLNF  
>187159\_109 0.5  
PQITLWQRPIVTVKVGQQLKEALLDTGADDTVLEEMCLPGKWKPKMIGGIGGFIKVRQYDQLLIEICGHKVIGTVLIG  
PTPVNIIGRNLLTQIGCTLNF  
>187159\_113 0.5  
PQITLWQRPIVTVKVGQQLKEALLDTGADDTVLEDMCLPGRWKPKMIGGIGGFIKVRQYDQILIEICGHKVIGTVLIG  
PTPVNIIGRNLLTQIGCTLNF  
>187159\_117 0.5  
PQITLWQRPIVTVKVGQQLKEALLDTGADDTVLEDMCLPGRWKPKMIGGIGGFIKVRQYDQLLIEICGHKVIGTVLIG  
PTPVNIIGRNLLTQIGCTLNF  
>187159\_121 0.5  
PQITLWQRPIVTVKVGQQLKEALLDTGADDTVLEDMCLPGKWKPKMIGGIGGFIKVRQYDQILIEICGHKVIGTVLIG  
PTPVNIIGRNLLTQIGCTLNF  
>187159\_125 0.5  
PQITLWQRPIVTVKVGQQLKEALLDTGADDTVLEDMCLPGKWKPKMIGGIGGFIKVRQYDQLLIEICGHKVIGTVLIG  
PTPVNIIGRNLLTQIGCTLNF  
>109422\_4 0.5  
PQITLWQRPLVTVRIGGQQLIEALLDTGADDTVLEEMNLPGRWKPKMIGGIGGFIKVRQYDQILVEICGHKAIGTVLIG  
PTPVNIIGRNLLTQIGCTLNF  
>109422\_5 0.5  
PQITLWQRPLVTVRIGGQQLIEALLDTGADDTVLEEMNLPGRWKPKMIGGIGGFIKVRQYDQILVEICGHKAIGTVLLG

PTPVNIIGRNLLTQIGCTLNF  
>109422\_6 0.5  
PQITLWQRPLVTVRIGGQLIEALLDTGADDTVLEEMNLP GKWKPKMIGGIGGFIKVRQYDQILVEICGHKAIGTVLIG  
PTPVNIIGRNLLTQIGCTLNF  
>109422\_7 0.5  
PQITLWQRPLVTVRIGGQLIEALLDTGADDTVLEEMNLP GKWKPKMIGGIGGFIKVRQYDQILVEICGHKAIGTVLLG  
PTPVNIIGRNLLTQIGCTLNF  
>109422\_8 0.5  
PQITLWQRPLVTVRIGGQLMEALLDTGADDTVLEEMNLP GRWKPKMIGGIGGFIKVRQYDQILVEICGHKAIGTVLIG  
PTPVNIIGRNLLTQIGCTLNF  
>109422\_9 0.5  
PQITLWQRPLVTVRIGGQLMEALLDTGADDTVLEEMNLP GRWKPKMIGGIGGFIKVRQYDQILVEICGHKAIGTVLLG  
PTPVNIIGRNLLTQIGCTLNF  
>109422\_10 0.5  
PQITLWQRPLVTVRIGGQLMEALLDTGADDTVLEEMNLP GKWKPKMIGGIGGFIKVRQYDQILVEICGHKAIGTVLIG  
PTPVNIIGRNLLTQIGCTLNF  
>109422\_11 0.5  
PQITLWQRPLVTVRIGGQLMEALLDTGADDTVLEEMNLP GKWKPKMIGGIGGFIKVRQYDQILVEICGHKAIGTVLLG  
PTPVNIIGRNLLTQIGCTLNF  
>206413\_0 0.5  
PQITLWQRPLVTIKVGGQLKEALLDTGADDTVLEDMNLP GRWKPKMIGGIGGFIKVGQYDQILIEICGHKAIGTVLVG  
PTPVNIIGRNLLTQIGCTLNF  
>216593\_0 0.4  
PQITLWQRPLVTIKIGGQLKEALLDTGADDTVLEDMNLP GRWKPKMIGGIGGFIKVGQYDHILIEICGHKAIGTVLLG  
PTPVNIIGRNLLTQLGCTLNF  
>216593\_1 0.4  
PQITLWQRPLVTIKIGGQLKEALLDTGADDTVLEDMNLP GRWKPKMIGGIGGFIKVGQYDHILVEICGHKAIGTVLLG  
PTPVNIIGRNLLTQLGCTLNF  
>216593\_2 0.4  
PQITLWQRPLVTIKIGGQLKEALLDTGADDTVLEDMNLP GKWKPKMIGGIGGFIKVGQYDHILIEICGHKAIGTVLLG  
PTPVNIIGRNLLTQLGCTLNF  
>216593\_3 0.4  
PQITLWQRPLVTIKIGGQLKEALLDTGADDTVLEDMNLP GKWKPKMIGGIGGFIKVGQYDHILVEICGHKAIGTVLLG  
PTPVNIIGRNLLTQLGCTLNF  
>187159\_3 0.5  
PQITLWQRPLVTIKVGGQLKEALLDTGADDTVLEEMCLP GRWKPKMIGGIGGFIKVRQYDQIPIEICGHKVIGTVLIG  
PTPVNIIGRNLLTQIGCTLNF  
>187159\_7 0.5  
PQITLWQRPLVTIKVGGQLKEALLDTGADDTVLEEMCLP GRWKPKMIGGIGGFIKVRQYDQLPIEICGHKVIGTVLIG  
PTPVNIIGRNLLTQIGCTLNF  
>187159\_11 0.5  
PQITLWQRPLVTIKVGGQLKEALLDTGADDTVLEEMCLP GKWKPKMIGGIGGFIKVRQYDQIPIEICGHKVIGTVLIG  
PTPVNIIGRNLLTQIGCTLNF  
>187159\_15 0.5  
PQITLWQRPLVTIKVGGQLKEALLDTGADDTVLEEMCLP GKWKPKMIGGIGGFIKVRQYDQLPIEICGHKVIGTVLIG  
PTPVNIIGRNLLTQIGCTLNF  
>187159\_19 0.5  
PQITLWQRPLVTIKVGGQLKEALLDTGADDTVLEEMCLP GRWKPKMIGGIGGFIKVRQYDQIPIEICGHKVIGTVLIG  
PTPVNIIGRNLLTQIGCTLNF  
>187159\_23 0.5  
PQITLWQRPLVTIKVGGQLKEALLDTGADDTVLEEMCLP GKWKPKMIGGIGGFIKVRQYDQLPIEICGHKVIGTVLIG  
PTPVNIIGRNLLTQIGCTLNF  
>187159\_31 0.5  
PQITLWQRPLVTIKVGGQLKEALLDTGADDTVLEEMCLP GKWKPKMIGGIGGFIKVRQYDQLPIEICGHKVIGTVLIG  
PTPVNIIGRNLLTQIGCTLNF  
>187159\_95 0.5  
PQITLWQRPIVTIKVGGQLKEALLDTGADDTVLEEMCLP GKWKPKMIGGIGGFIKVRQYDQLPIEICGHKVIGTVLIG  
PTPVNIIGRNLLTQIGCTLNF  
>187159\_103 0.5  
PQITLWQRPIVTVKVGQLKEALLDTGADDTVLEEMCLP GRWKPKMIGGIGGFIKVRQYDQLPIEICGHKVIGTVLIG  
PTPVNIIGRNLLTQIGCTLNF  
>187159\_107 0.5  
PQITLWQRPIVTVKVGQLKEALLDTGADDTVLEEMCLP GKWKPKMIGGIGGFIKVRQYDQIPIEICGHKVIGTVLIG

PTPVNIIGRNLLTQIGCTLNF  
>187159\_111 0.5  
PQITLWQRPIVTVKVGGLKEALLDTGADDTVLEEMCLPGKWKPKMIGGIGGFIKVRQYDQLPIEICGHKVIQTVLIG  
PTPVNIIGRNLLTQIGCTLNF  
>187159\_115 0.5  
PQITLWQRPIVTVKVGGLKEALLDTGADDTVLEDMCLPGRWKPKMIGGIGGFIKVRQYDQIPIEICGHKVIQTVLIG  
PTPVNIIGRNLLTQIGCTLNF  
>187159\_119 0.5  
PQITLWQRPIVTVKVGGLKEALLDTGADDTVLEDMCLPGRWKPKMIGGIGGFIKVRQYDQLPIEICGHKVIQTVLIG  
PTPVNIIGRNLLTQIGCTLNF  
>187159\_123 0.5  
PQITLWQRPIVTVKVGGLKEALLDTGADDTVLEDMCLPGKWKPKMIGGIGGFIKVRQYDQIPIEICGHKVIQTVLIG  
PTPVNIIGRNLLTQIGCTLNF  
>187159\_127 0.5  
PQITLWQRPIVTVKVGGLKEALLDTGADDTVLEDMCLPGKWKPKMIGGIGGFIKVRQYDQLPIEICGHKVIQTVLIG  
PTPVNIIGRNLLTQIGCTLNF  
>257929\_0 0.4  
PQITLWQRPLVTVKVGGLKEALLDTGADDTVLEEMNLQGRWKPKMIGGIGGFIKVKQYDQIPVEICGHKAIGTVLVG  
PTPVNIIGRNLLTQIGCTLNF  
>187159\_14 0.5  
PQITLWQRPLVTIKVGGLKEALLDTGADDTVLEEMCLPGKWKPKMIGGIGGFIKVRQYDQLPIEICGHKAIGTVLIG  
PTPVNIIGRNLLTQIGCTLNF  
>187159\_18 0.5  
PQITLWQRPLVTIKVGGLKEALLDTGADDTVLEDMCLPGRWKPKMIGGIGGFIKVRQYDQIPIEICGHKAIGTVLIG  
PTPVNIIGRNLLTQIGCTLNF  
>187159\_22 0.5  
PQITLWQRPLVTIKVGGLKEALLDTGADDTVLEDMCLPGRWKPKMIGGIGGFIKVRQYDQLPIEICGHKAIGTVLIG  
PTPVNIIGRNLLTQIGCTLNF  
>187159\_26 0.5  
PQITLWQRPLVTIKVGGLKEALLDTGADDTVLEDMCLPGKWKPKMIGGIGGFIKVRQYDQIPIEICGHKAIGTVLIG  
PTPVNIIGRNLLTQIGCTLNF  
>187159\_30 0.5  
PQITLWQRPLVTIKVGGLKEALLDTGADDTVLEDMCLPGKWKPKMIGGIGGFIKVRQYDQLPIEICGHKAIGTVLIG  
PTPVNIIGRNLLTQIGCTLNF  
>187159\_34 0.5  
PQITLWQRPLVTVKVGGLKEALLDTGADDTVLEEMCLPGRWKPKMIGGIGGFIKVRQYDQIPIEICGHKAIGTVLIG  
PTPVNIIGRNLLTQIGCTLNF  
>187159\_38 0.5  
PQITLWQRPLVTVKVGGLKEALLDTGADDTVLEEMCLPGRWKPKMIGGIGGFIKVRQYDQLPIEICGHKAIGTVLIG  
PTPVNIIGRNLLTQIGCTLNF  
>187159\_42 0.5  
PQITLWQRPLVTVKVGGLKEALLDTGADDTVLEEMCLPGKWKPKMIGGIGGFIKVRQYDQIPIEICGHKAIGTVLIG  
PTPVNIIGRNLLTQIGCTLNF  
>187159\_46 0.5  
PQITLWQRPLVTVKVGGLKEALLDTGADDTVLEEMCLPGKWKPKMIGGIGGFIKVRQYDQLPIEICGHKAIGTVLIG  
PTPVNIIGRNLLTQIGCTLNF  
>187159\_50 0.5  
PQITLWQRPLVTVKVGGLKEALLDTGADDTVLEDMCLPGRWKPKMIGGIGGFIKVRQYDQIPIEICGHKAIGTVLIG  
PTPVNIIGRNLLTQIGCTLNF  
>187159\_54 0.5  
PQITLWQRPLVTVKVGGLKEALLDTGADDTVLEDMCLPGRWKPKMIGGIGGFIKVRQYDQLPIEICGHKAIGTVLIG  
PTPVNIIGRNLLTQIGCTLNF  
>187159\_58 0.5  
PQITLWQRPLVTVKVGGLKEALLDTGADDTVLEDMCLPGKWKPKMIGGIGGFIKVRQYDQIPIEICGHKAIGTVLIG  
PTPVNIIGRNLLTQIGCTLNF  
>187159\_66 0.5  
PQITLWQRPIVTIKVGGLKEALLDTGADDTVLEEMCLPGRWKPKMIGGIGGFIKVRQYDQIPIEICGHKAIGTVLIG  
PTPVNIIGRNLLTQIGCTLNF  
>187159\_70 0.5  
PQITLWQRPIVTIKVGGLKEALLDTGADDTVLEEMCLPGRWKPKMIGGIGGFIKVRQYDQLPIEICGHKAIGTVLIG  
PTPVNIIGRNLLTQIGCTLNF  
>187159\_98 0.5  
PQITLWQRPIVTVKVGGLKEALLDTGADDTVLEEMCLPGRWKPKMIGGIGGFIKVRQYDQIPIEICGHKAIGTVLIG

PTPVNIIGRNLLTQIGCTLNF  
 >187159\_102 0.5  
 PQITLWQRPIVTVKVGGLKEALLDTGADDTVLEEMCLPGRWKPKMIGGIGGFIKVRQYDQLPIEICGHKAIGTVLIG  
 PTPVNIIGRNLLTQIGCTLNF  
 >187159\_106 0.5  
 PQITLWQRPIVTVKVGGLKEALLDTGADDTVLEEMCLPGKWKPKMIGGIGGFIKVRQYDQIPIEICGHKAIGTVLIG  
 PTPVNIIGRNLLTQIGCTLNF  
 >187159\_110 0.5  
 PQITLWQRPIVTVKVGGLKEALLDTGADDTVLEEMCLPGKWKPKMIGGIGGFIKVRQYDQLPIEICGHKAIGTVLIG  
 PTPVNIIGRNLLTQIGCTLNF  
 >187159\_114 0.5  
 PQITLWQRPIVTVKVGGLKEALLDTGADDTVLEDMCLPGRWKPKMIGGIGGFIKVRQYDQIPIEICGHKAIGTVLIG  
 PTPVNIIGRNLLTQIGCTLNF  
 >187159\_118 0.5  
 PQITLWQRPIVTVKVGGLKEALLDTGADDTVLEDMCLPGRWKPKMIGGIGGFIKVRQYDQIPIEICGHKAIGTVLIG  
 PTPVNIIGRNLLTQIGCTLNF  
 >187159\_122 0.5  
 PQITLWQRPIVTVKVGGLKEALLDTGADDTVLEDMCLPGKWKPKMIGGIGGFIKVRQYDQIPIEICGHKAIGTVLIG  
 PTPVNIIGRNLLTQIGCTLNF  
 >187159\_126 0.5  
 PQITLWQRPIVTVKVGGLKEALLDTGADDTVLEDMCLPGKWKPKMIGGIGGFIKVRQYDQIPIEICGHKAIGTVLIG  
 PTPVNIIGRNLLTQIGCTLNF  
 >87104\_0 0.4  
 PQITLWQRPLVAIKIGGLKEALLDTGADDTVLEEINLPGRWKPKMIGGIGGFIKVKQYDQVPIEICGHKAIGTVLVG  
 PTPVNIIGRNLLTQLGCTLNF  
 >87104\_1 0.4  
 PQITLWQRPLVAIRIGGLKEALLDTGADDTVLEEINLPGRWKPKMIGGIGGFIKVKQYDQVPIEICGHKAIGTVLVG  
 PTPVNIIGRNLLTQLGCTLNF  
 >198533\_0 0.5  
 PQITLWQRPLVTIKIGGLKEALLDTGADDTVLEEMELPGRWKPKMIGGIGGFIKVRQYDQIPIEICGHTARGETVLVIG  
 PTPVNIIGRNLLTQIGCTLNF  
 >148111\_0 0.3  
 PQITLWQRPLVTVKIGGLKEALLDTGADDTVLEEMNLPGRWKPRMIGGIGGFIKVRQYDQISMEICGHKAIGTVLIG  
 PTPVNIIGRNLLTQIGCTLNF  
 >148111\_1 0.3  
 PQITLWQRPLVTVKIGGLKEALLDTGADDTVLEEMNLPGRWKPRMIGGIGGFIKVRQYDQVSMEICGHKAIGTVLIG  
 PTPVNIIGRNLLTQIGCTLNF  
 >198527\_0 0.4  
 PQITLWQRPLVTIKIGGLKEALLDTGADDTVLEEMNLPGRWKPKMIGGIGGFIKVRQYDEV TIDICGHKAIGTVLIG  
 PTPVNIIGRNLLTQIGCTLNF

**Sequences for the DRV-resistant ensemble**

>205693\_6 580.0  
 PQITLWQRPFIPVKIGGQQMEALLDTGADDTILEGTNLPGRWTPKIVGGIGGFMRVGQYDQIPIEICGQKIIGTVLVG  
 PTPANIIGRNVMTQIGCTLNF  
 >205693\_7 580.0  
 PQITLWQRPFIPVKIGGQQMEALLDTGADDTILEGTNLPGRWTPKIVGGIGGFMRVGQYDQIPIEYGGQKIIGTVLVG  
 PTPANIIGRNVMTQIGCTLNF  
 >205693\_2 580.0  
 PQITLWQRPFIPVKIGGQQMEALLDTGADDTILEETNLPGRWTPKIVGGIGGFMRVGQYDQIPIEICGQKIIGTVLVG  
 PTPANIIGRNVMTQIGCTLNF  
 >205693\_3 580.0  
 PQITLWQRPFIPVKIGGQQMEALLDTGADDTILEETNLPGRWTPKIVGGIGGFMRVGQYDQIPIEYGGQKIIGTVLVG  
 PTPANIIGRNVMTQIGCTLNF  
 >205693\_4 580.0  
 PQITLWQRPFIPVKIGGQQMEALLDTGADDTILEGINLPGRWTPKIVGGIGGFMRVGQYDQIPIEICGQKIIGTVLVG  
 PTPANIIGRNVMTQIGCTLNF  
 >205693\_5 580.0  
 PQITLWQRPFIPVKIGGQQMEALLDTGADDTILEGINLPGRWTPKIVGGIGGFMRVGQYDQIPIEYGGQKIIGTVLVG  
 PTPANIIGRNVMTQIGCTLNF  
 >205693\_0 580.0  
 PQITLWQRPFIPVKIGGQQMEALLDTGADDTILEEINLPGRWTPKIVGGIGGFMRVGQYDQIPIEICGQKIIGTVLVG  
 PTPANIIGRNVMTQIGCTLNF

>205693\_1 580.0  
PQITLWQRPFIPVKIGGQQMEALLDTGADDTILEEINLPGRWTPKIVGGIGGFMRVQYDQIPIEYQYQKIIGTVLVG  
PTPANIIGRNVMTQIGCTLNF  
>117075\_0 500.0  
PQITLWQRPLITVKIGGQLVEALMDTGADDTIFEGINLPGRWKPKMIGGIGGFLNVRQYEQIPIEICGHKILSTVLVG  
STPLNVIGRNVMSKIGCTLNF  
>117075\_1 500.0  
PQITLWQRPLITVKIGGQLVEALMDTGADDTIFEGINLPGRWKPKMIGGIGGFLNVREYEQIPIEICGHKILSTVLVG  
STPLNVIGRNVMSKIGCTLNF  
>117075\_2 500.0  
PQITLWQRPLITVKVGGQLVEALMDTGADDTIFEGINLPGRWKPKMIGGIGGFLNVRQYEQIPIEICGHKILSTVLVG  
STPLNVIGRNVMSKIGCTLNF  
>117075\_3 500.0  
PQITLWQRPLITVKVGGQLVEALMDTGADDTIFEGINLPGRWKPKMIGGIGGFLNVREYEQIPIEICGHKILSTVLVG  
STPLNVIGRNVMSKIGCTLNF  
>117075\_4 500.0  
PQITLWQRPFITVKIGGQLVEALMDTGADDTIFEGINLPGRWKPKMIGGIGGFLNVRQYEQIPIEICGHKILSTVLVG  
STPLNVIGRNVMSKIGCTLNF  
>117075\_5 500.0  
PQITLWQRPFITVKIGGQLVEALMDTGADDTIFEGINLPGRWKPKMIGGIGGFLNVREYEQIPIEICGHKILSTVLVG  
STPLNVIGRNVMSKIGCTLNF  
>117075\_6 500.0  
PQITLWQRPFITVKVGGQLVEALMDTGADDTIFEGINLPGRWKPKMIGGIGGFLNVRQYEQIPIEICGHKILSTVLVG  
STPLNVIGRNVMSKIGCTLNF  
>117075\_7 500.0  
PQITLWQRPFITVKVGGQLVEALMDTGADDTIFEGINLPGRWKPKMIGGIGGFLNVREYEQIPIEICGHKILSTVLVG  
STPLNVIGRNVMSKIGCTLNF  
>117075\_8 500.0  
PQITLWQRPVITVKIGGQLVEALMDTGADDTIFEGINLPGRWKPKMIGGIGGFLNVRQYEQIPIEICGHKILSTVLVG  
STPLNVIGRNVMSKIGCTLNF  
>117075\_9 500.0  
PQITLWQRPVITVKIGGQLVEALMDTGADDTIFEGINLPGRWKPKMIGGIGGFLNVREYEQIPIEICGHKILSTVLVG  
STPLNVIGRNVMSKIGCTLNF  
>117075\_10 500.0  
PQITLWQRPVITVKVGGQLVEALMDTGADDTIFEGINLPGRWKPKMIGGIGGFLNVRQYEQIPIEICGHKILSTVLVG  
STPLNVIGRNVMSKIGCTLNF  
>117075\_11 500.0  
PQITLWQRPVITVKVGGQLVEALMDTGADDTIFEGINLPGRWKPKMIGGIGGFLNVREYEQIPIEICGHKILSTVLVG  
STPLNVIGRNVMSKIGCTLNF  
>103779\_0 500.0  
PQITLWQRPIIKVKIGGQLVEALLDTGADDTILEGINLPGRWKPKIVGGIGGFMKVKEYDQIPVEICGHKIISTVLVG  
PTPVNIIGRNVMTQIGCTLNF  
>103779\_1 500.0  
PQITLWQRPIIKVKIGGQLVEALLDTGADDTILEGINLPGRWKPKIVGGIGGFMKVKEYDQIPVEICGHKIISTVLVG  
PTPVNVIGRNVMTQIGCTLNF  
>103779\_2 500.0  
PQITLWQRPIIKVKIGGQLVEALLDTGADDTILEGINLPGRWKPKIVGGIGGFMKVKEYDQIPVEICGHKVISTVLVG  
PTPVNIIGRNVMTQIGCTLNF  
>103779\_3 500.0  
PQITLWQRPIIKVKIGGQLVEALLDTGADDTILEGINLPGRWKPKIVGGIGGFMKVKEYDQIPVEICGHKVISTVLVG  
PTPVNVIGRNVMTQIGCTLNF  
>103779\_4 500.0  
PQITLWQRPIIKVKIGGQLVEALLDTGADDTILEGIDLPGRWKPKIVGGIGGFMKVKEYDQIPVEICGHKIISTVLVG  
PTPVNIIGRNVMTQIGCTLNF  
>103779\_5 500.0  
PQITLWQRPIIKVKIGGQLVEALLDTGADDTILEGIDLPGRWKPKIVGGIGGFMKVKEYDQIPVEICGHKIISTVLVG  
PTPVNVIGRNVMTQIGCTLNF  
>103779\_6 500.0  
PQITLWQRPIIKVKIGGQLVEALLDTGADDTILEGIDLPGRWKPKIVGGIGGFMKVKEYDQIPVEICGHKVISTVLVG  
PTPVNIIGRNVMTQIGCTLNF  
>103779\_7 500.0  
PQITLWQRPIIKVKIGGQLVEALLDTGADDTILEGIDLPGRWKPKIVGGIGGFMKVKEYDQIPVEICGHKVISTVLVG  
PTPVNVIGRNVMTQIGCTLNF

>103779\_8 500.0  
PQITLWQRPIIKVKIGGQLVEALLDTGADDTIFEGINLPGRWPKIVGGIGGFMKVKEYDQIPVEICGHKIISTVLVG  
PTPVNIIGRNVMTQIGCTLNF

>103779\_9 500.0  
PQITLWQRPIIKVKIGGQLVEALLDTGADDTIFEGINLPGRWPKIVGGIGGFMKVKEYDQIPVEICGHKIISTVLVG  
PTPVNIIGRNVMTQIGCTLNF

>103779\_10 500.0  
PQITLWQRPIIKVKIGGQLVEALLDTGADDTIFEGINLPGRWPKIVGGIGGFMKVKEYDQIPVEICGHKVISTVLVG  
PTPVNIIGRNVMTQIGCTLNF

>103779\_11 500.0  
PQITLWQRPIIKVKIGGQLVEALLDTGADDTIFEGINLPGRWPKIVGGIGGFMKVKEYDQIPVEICGHKVISTVLVG  
PTPVNIIGRNVMTQIGCTLNF

>103779\_12 500.0  
PQITLWQRPIIKVKIGGQLVEALLDTGADDTIFEGIDLPGRWPKIVGGIGGFMKVKEYDQIPVEICGHKIISTVLVG  
PTPVNIIGRNVMTQIGCTLNF

>103779\_13 500.0  
PQITLWQRPIIKVKIGGQLVEALLDTGADDTIFEGIDLPGRWPKIVGGIGGFMKVKEYDQIPVEICGHKIISTVLVG  
PTPVNIIGRNVMTQIGCTLNF

>103779\_14 500.0  
PQITLWQRPIIKVKIGGQLVEALLDTGADDTIFEGIDLPGRWPKIVGGIGGFMKVKEYDQIPVEICGHKVISTVLVG  
PTPVNIIGRNVMTQIGCTLNF

>103779\_15 500.0  
PQITLWQRPIIKVKIGGQLVEALLDTGADDTIFEGIDLPGRWPKIVGGIGGFMKVKEYDQIPVEICGHKVISTVLVG  
PTPVNIIGRNVMTQIGCTLNF

>147550\_0 500.0  
PQITLWQRPIIKVKIGGQLVEALLDTGADDTIFEGIDLPGRWPKIVGGIGGFMKVKEYDQIPVEICGHKVISTVLVG  
PTPVNIIGRNVMTQIGCTLNF

>86742\_0 500.0  
PQITLWQRPFITIKIGGQLREALLDTGADDTIFEDIQLPGRWPKIVGGIGGFLKVKEYEQVPIEICGHKVISTVLTG  
PTPVNIIGRNVMTQLGCTLNF

>86742\_1 500.0  
PQITLWQRPFITVKIGGQLREALLDTGADDTIFEDIQLPGRWPKIVGGIGGFLKVKEYEQVPIEICGHKVISTVLTG  
PTPVNIIGRNVMTQLGCTLNF

>103067\_0 500.0  
PQITLWQRPFITVKIAGQLKEALLDTGADDTVFQEMNLPGRWIPKLIGGIAGFMKVRQYDQIPMEIYGHKVMATVLVG  
PTPVNIIGRNLMTQIGCTLNF

>103067\_1 500.0  
PQITLWQRPFITVKIAGQVKEALLDTGADDTVFQEMNLPGRWIPKLIGGIAGFMKVRQYDQIPMEIYGHKVMATVLVG  
PTPVNIIGRNLMTQIGCTLNF

>90022\_35 491.0  
PQITLWQRPFVAVKIGGQLREALLDTGADNTIFEDVTLPGRWQPKIVGGIGGLLKVKQYDQVPIEIWGHKVVGTVLIG  
PTPVNVLGRDVMTQIGCTLNF

>90022\_36 491.0  
PQITLWQRPFVAVKIGGQLREALLDTGADNTIFEDVTLPGRWQPKIVGGIGGLLKVKQYDQVPIEVWGHKVVGTVLIG  
PTPVNVIGRDLMTQIGCTLNF

>90022\_37 491.0  
PQITLWQRPFVAVKIGGQLREALLDTGADNTIFEDVTLPGRWQPKIVGGIGGLLKVKQYDQVPIEVWGHKVVGTVLIG  
PTPVNVIGRDLMTQIGCTLNF

>90022\_38 491.0  
PQITLWQRPFVAVKIGGQLREALLDTGADNTIFEDVTLPGRWQPKIVGGIGGLLKVKQYDQVPIEVWGHKVVGTVLIG  
PTPVNVLGRDLMTQIGCTLNF

>90022\_39 491.0  
PQITLWQRPFVAVKIGGQLREALLDTGADNTIFEDVTLPGRWQPKIVGGIGGLLKVKQYDQVPIEVWGHKVVGTVLIG  
PTPVNVLGRDVMTQIGCTLNF

>90022\_40 491.0  
PQITLWQRPFVAVKIGGQLREALLDTGADNTIFEDVTLPGRWQPKIVGGIGGLLRVKQYDQVPIEIWGHKVVGTVLIG  
PTPVNVIGRDLMTQIGCTLNF

>90022\_41 491.0  
PQITLWQRPFVAVKIGGQLREALLDTGADNTIFEDVTLPGRWQPKIVGGIGGLLRVKQYDQVPIEIWGHKVVGTVLIG  
PTPVNVIGRDLMTQIGCTLNF

>90022\_42 491.0  
PQITLWQRPFVAVKIGGQLREALLDTGADNTIFEDVTLPGRWQPKIVGGIGGLLRVKQYDQVPIEIWGHKVVGTVLIG  
PTPVNVLGRDLMTQIGCTLNF



>90022\_43 491.0  
PQITLWQRPFVAVKIGGQLREALDGTGADNTIFEDVTLPGRWQPKIVGGIGLLRVKQYDQVPIEIWGHKVVGTVLIG  
PTPVNVLGRDVMQTIGCTLNF

>90022\_44 491.0  
PQITLWQRPFVAVKIGGQLREALDGTGADNTIFEDVTLPGRWQPKIVGGIGLLRVKQYDQVPIEVWGHKVVGTVLIG  
PTPVNVIGRDLMTQIGCTLNF

>90022\_45 491.0  
PQITLWQRPFVAVKIGGQLREALDGTGADNTIFEDVTLPGRWQPKIVGGIGLLRVKQYDQVPIEVWGHKVVGTVLIG  
PTPVNVIGRDMVTQIGCTLNF

>90022\_46 491.0  
PQITLWQRPFVAVKIGGQLREALDGTGADNTIFEDVTLPGRWQPKIVGGIGLLRVKQYDQVPIEVWGHKVVGTVLIG  
PTPVNVLGRDLMTQIGCTLNF

>90022\_47 491.0  
PQITLWQRPFVAVKIGGQLREALDGTGADNTIFEDVTLPGRWQPKIVGGIGLLRVKQYDQVPIEVWGHKVVGTVLIG  
PTPVNVLGRDVMQTIGCTLNF

>90022\_48 491.0  
PQITLWQRPFVAVRIGGQLREALDGTGADNTIFEDVTLPGRWQPKIVGGIGLLKVKQYDQVPIEIWGHKVVGTVLIG  
PTPVNVIGRDLMTQIGCTLNF

>90022\_49 491.0  
PQITLWQRPFVAVRIGGQLREALDGTGADNTIFEDVTLPGRWQPKIVGGIGLLKVKQYDQVPIEIWGHKVVGTVLIG  
PTPVNVIGRDMVTQIGCTLNF

>90022\_50 491.0  
PQITLWQRPFVAVRIGGQLREALDGTGADNTIFEDVTLPGRWQPKIVGGIGLLKVKQYDQVPIEIWGHKVVGTVLIG  
PTPVNVLGRDLMTQIGCTLNF

>90022\_51 491.0  
PQITLWQRPFVAVRIGGQLREALDGTGADNTIFEDVTLPGRWQPKIVGGIGLLKVKQYDQVPIEIWGHKVVGTVLIG  
PTPVNVLGRDVMQTIGCTLNF

>90022\_52 491.0  
PQITLWQRPFVAVRIGGQLREALDGTGADNTIFEDVTLPGRWQPKIVGGIGLLKVKQYDQVPIEVWGHKVVGTVLIG  
PTPVNVIGRDLMTQIGCTLNF

>90022\_53 491.0  
PQITLWQRPFVAVRIGGQLREALDGTGADNTIFEDVTLPGRWQPKIVGGIGLLKVKQYDQVPIEVWGHKVVGTVLIG  
PTPVNVIGRDMVTQIGCTLNF

>90022\_54 491.0  
PQITLWQRPFVAVRIGGQLREALDGTGADNTIFEDVTLPGRWQPKIVGGIGLLKVKQYDQVPIEVWGHKVVGTVLIG  
PTPVNVLGRDLMTQIGCTLNF

>90022\_55 491.0  
PQITLWQRPFVAVRIGGQLREALDGTGADNTIFEDVTLPGRWQPKIVGGIGLLKVKQYDQVPIEVWGHKVVGTVLIG  
PTPVNVLGRDVMQTIGCTLNF

>90022\_56 491.0  
PQITLWQRPFVAVRIGGQLREALDGTGADNTIFEDVTLPGRWQPKIVGGIGLLRVKQYDQVPIEIWGHKVVGTVLIG  
PTPVNVIGRDLMTQIGCTLNF

>90022\_57 491.0  
PQITLWQRPFVAVRIGGQLREALDGTGADNTIFEDVTLPGRWQPKIVGGIGLLRVKQYDQVPIEIWGHKVVGTVLIG  
PTPVNVIGRDMVTQIGCTLNF

>90022\_58 491.0  
PQITLWQRPFVAVRIGGQLREALDGTGADNTIFEDVTLPGRWQPKIVGGIGLLRVKQYDQVPIEIWGHKVVGTVLIG  
PTPVNVLGRDLMTQIGCTLNF

>90022\_59 491.0  
PQITLWQRPFVAVRIGGQLREALDGTGADNTIFEDVTLPGRWQPKIVGGIGLLRVKQYDQVPIEIWGHKVVGTVLIG  
PTPVNVLGRDVMQTIGCTLNF

>90022\_60 491.0  
PQITLWQRPFVAVRIGGQLREALDGTGADNTIFEDVTLPGRWQPKIVGGIGLLRVKQYDQVPIEVWGHKVVGTVLIG  
PTPVNVIGRDLMTQIGCTLNF

>90022\_61 491.0  
PQITLWQRPFVAVRIGGQLREALDGTGADNTIFEDVTLPGRWQPKIVGGIGLLRVKQYDQVPIEVWGHKVVGTVLIG  
PTPVNVIGRDMVTQIGCTLNF

>90022\_62 491.0  
PQITLWQRPFVAVRIGGQLREALDGTGADNTIFEDVTLPGRWQPKIVGGIGLLRVKQYDQVPIEVWGHKVVGTVLIG  
PTPVNVLGRDLMTQIGCTLNF

>90022\_96 491.0  
PQITLWQRPFIAVKIGGQLREALDGTGADNTIFEDVTLPGRWQPKIVGGIGLLKVKQYDQVPIEIWGHKVVGTVLIG  
PTPVNVIGRDLMTQIGCTLNF

>90022\_97 491.0  
PQITLWQRPFIAVKIGGQLREALDGTGADNTIFEDVTLPGRWQPKIVGGIGGLLKVKQYDQVPIEIWGHKVVGTVLIG  
PTPVNVIGRDVMTQIGCTLNF

>90022\_98 491.0  
PQITLWQRPFIAVKIGGQLREALDGTGADNTIFEDVTLPGRWQPKIVGGIGGLLKVKQYDQVPIEIWGHKVVGTVLIG  
PTPVNVLGRDLMTQIGCTLNF

>90022\_99 491.0  
PQITLWQRPFIAVKIGGQLREALDGTGADNTIFEDVTLPGRWQPKIVGGIGGLLKVKQYDQVPIEIWGHKVVGTVLIG  
PTPVNVLGRDVMTQIGCTLNF

>90022\_100 491.0  
PQITLWQRPFIAVKIGGQLREALDGTGADNTIFEDVTLPGRWQPKIVGGIGGLLKVKQYDQVPIEVWGHKVVGTVLIG  
PTPVNVIGRDLMTQIGCTLNF

>90022\_101 491.0  
PQITLWQRPFIAVKIGGQLREALDGTGADNTIFEDVTLPGRWQPKIVGGIGGLLKVKQYDQVPIEVWGHKVVGTVLIG  
PTPVNVIGRDVMTQIGCTLNF

>90022\_102 491.0  
PQITLWQRPFIAVKIGGQLREALDGTGADNTIFEDVTLPGRWQPKIVGGIGGLLKVKQYDQVPIEVWGHKVVGTVLIG  
PTPVNVLGRDLMTQIGCTLNF

>90022\_103 491.0  
PQITLWQRPFIAVKIGGQLREALDGTGADNTIFEDVTLPGRWQPKIVGGIGGLLKVKQYDQVPIEVWGHKVVGTVLIG  
PTPVNVLGRDVMTQIGCTLNF

>90022\_104 491.0  
PQITLWQRPFIAVKIGGQLREALDGTGADNTIFEDVTLPGRWQPKIVGGIGGLLRVKQYDQVPIEIWGHKVVGTVLIG  
PTPVNVIGRDLMTQIGCTLNF

>90022\_105 491.0  
PQITLWQRPFIAVKIGGQLREALDGTGADNTIFEDVTLPGRWQPKIVGGIGGLLRVKQYDQVPIEIWGHKVVGTVLIG  
PTPVNVIGRDVMTQIGCTLNF

>90022\_106 491.0  
PQITLWQRPFIAVKIGGQLREALDGTGADNTIFEDVTLPGRWQPKIVGGIGGLLRVKQYDQVPIEIWGHKVVGTVLIG  
PTPVNVLGRDLMTQIGCTLNF

>90022\_107 491.0  
PQITLWQRPFIAVKIGGQLREALDGTGADNTIFEDVTLPGRWQPKIVGGIGGLLRVKQYDQVPIEIWGHKVVGTVLIG  
PTPVNVLGRDVMTQIGCTLNF

>90022\_108 491.0  
PQITLWQRPFIAVKIGGQLREALDGTGADNTIFEDVTLPGRWQPKIVGGIGGLLRVKQYDQVPIEVWGHKVVGTVLIG  
PTPVNVIGRDLMTQIGCTLNF

>90022\_109 491.0  
PQITLWQRPFIAVKIGGQLREALDGTGADNTIFEDVTLPGRWQPKIVGGIGGLLRVKQYDQVPIEVWGHKVVGTVLIG  
PTPVNVIGRDVMTQIGCTLNF

>90022\_110 491.0  
PQITLWQRPFIAVKIGGQLREALDGTGADNTIFEDVTLPGRWQPKIVGGIGGLLRVKQYDQVPIEVWGHKVVGTVLIG  
PTPVNVLGRDLMTQIGCTLNF

>90022\_111 491.0  
PQITLWQRPFIAVKIGGQLREALDGTGADNTIFEDVTLPGRWQPKIVGGIGGLLRVKQYDQVPIEVWGHKVVGTVLIG  
PTPVNVLGRDVMTQIGCTLNF

>90022\_112 491.0  
PQITLWQRPFIAVRIGGQLREALDGTGADNTIFEDVTLPGRWQPKIVGGIGGLLKVKQYDQVPIEIWGHKVVGTVLIG  
PTPVNVIGRDLMTQIGCTLNF

>90022\_113 491.0  
PQITLWQRPFIAVRIGGQLREALDGTGADNTIFEDVTLPGRWQPKIVGGIGGLLKVKQYDQVPIEIWGHKVVGTVLIG  
PTPVNVIGRDVMTQIGCTLNF

>90022\_114 491.0  
PQITLWQRPFIAVRIGGQLREALDGTGADNTIFEDVTLPGRWQPKIVGGIGGLLKVKQYDQVPIEIWGHKVVGTVLIG  
PTPVNVLGRDLMTQIGCTLNF

>90022\_115 491.0  
PQITLWQRPFIAVRIGGQLREALDGTGADNTIFEDVTLPGRWQPKIVGGIGGLLKVKQYDQVPIEIWGHKVVGTVLIG  
PTPVNVLGRDVMTQIGCTLNF

>90022\_116 491.0  
PQITLWQRPFIAVRIGGQLREALDGTGADNTIFEDVTLPGRWQPKIVGGIGGLLKVKQYDQVPIEVWGHKVVGTVLIG  
PTPVNVIGRDLMTQIGCTLNF

>90022\_117 491.0  
PQITLWQRPFIAVRIGGQLREALDGTGADNTIFEDVTLPGRWQPKIVGGIGGLLKVKQYDQVPIEVWGHKVVGTVLIG  
PTPVNVIGRDVMTQIGCTLNF

>90022\_118 491.0  
PQITLWQRPFIAVRIGGQLREALDGTGADNTIFEDVTLPGRWQPKIVGGIGGLLKVKQYDQVPIEVWGHKVVGTVLIG  
PTPVNVLGRDLMTQIGCTLNF

>90022\_119 491.0  
PQITLWQRPFIAVRIGGQLREALDGTGADNTIFEDVTLPGRWQPKIVGGIGGLLKVKQYDQVPIEVWGHKVVGTVLIG  
PTPVNVLGRDVMVTQIGCTLNF

>90022\_120 491.0  
PQITLWQRPFIAVRIGGQLREALDGTGADNTIFEDVTLPGRWQPKIVGGIGGLLRVKQYDQVPIEIVWGHKVVGTVLIG  
PTPVNVIGRDLMTQIGCTLNF

>117069\_0 500.0  
PQITLWQRPIILTVKVIAGQLTEALLDGTGADDTIFQDINLPGRWTPKIVGGIGGLLRVRQYEQVPIEVCGHKIITTVLIG  
PTPVNVLGRNLMTQLGCTLNF

>117069\_1 500.0  
PQITLWQRPIILTVKVAGQLTEALLDGTGADDTIFQDINLPGRWTPKIVGGIGGLLRVRQYEQVPIEVCGHKIITTVLIG  
PTPVNVLGRNLMTQLGCTLNF

>90022\_12 491.0  
PQITLWQRPFVTVKIGGQLREALDGTGADNTIFEDVTLPGRWQPKIVGGIGGLLRVKQYDQVPIEVWGHKVVGTVLIG  
PTPVNVIGRDLMTQIGCTLNF

>90022\_22 491.0  
PQITLWQRPFVTVRIGGQLREALDGTGADNTIFEDVTLPGRWQPKIVGGIGGLLKVKQYDQVPIEVWGHKVVGTVLIG  
PTPVNVLGRDLMTQIGCTLNF

>90022\_23 491.0  
PQITLWQRPFVTVRIGGQLREALDGTGADNTIFEDVTLPGRWQPKIVGGIGGLLKVKQYDQVPIEVWGHKVVGTVLIG  
PTPVNVLGRDVMVTQIGCTLNF

>90022\_65 491.0  
PQITLWQRPFITVKIGGQLREALDGTGADNTIFEDVTLPGRWQPKIVGGIGGLLKVKQYDQVPIEIVWGHKVVGTVLIG  
PTPVNVIGRDMVTQIGCTLNF

**Sequences for the DRV-susceptible ensemble**

>216607\_0 0.2  
PQITLWQRPLVTIKIGGQLKEALLDGTGADDTVLEEMNLPGRWKPRMIGGIGGFIKVGQYDQMPIEICGHKTEGTVLVG  
PTPVNIIGRNLLTQIGCTLNF

>216607\_1 0.2  
PQITLWQRPLVTIKIGGQLKEALLDGTGADDTVLEEMNLPGRWKPRMIGGIGGFIKVGQYDQMPIEICGHKTEGTVLVG  
PTPVNIIGRNLLTQMGCTLNF

>216607\_2 0.2  
PQITLWQRPLVTIKIGGQLKEALLDGTGADDTVLEEMNLPGRWKPRMIGGIGGFIKVGQYDQMPIEICGHKTEGTVLVG  
PTPVNIIGRNLLTQIGCTLNF

>216607\_3 0.2  
PQITLWQRPLVTIKIGGQLKEALLDGTGADDTVLEEMNLPGRWKPRMIGGIGGFIKVGQYDQMPIEICGHKTEGTVLVG  
PTPVNIIGRNLLTQMGCTLNF

>116920\_3 0.2  
PQITLWQRPLVTIKIGGQLKEALLDGTGADDTVLEEMNLPGRWKPRMIGGLGGFIKVRQYDQVPIEICGHKTVSTVLIG  
PTPANIIGRNLLTQLGCTLNF

>116920\_1 0.2  
PQITLWQRPLVTIKIGGQLKEALLDGTGADDTVLEEMNLPGRWKPRMIGGLGGFIKVRQYDQVPIEICGHKIVSTVLIG  
PTPANIIGRNLLTQLGCTLNF

>258503\_0 0.3  
PQITLWQRPLVTIKIGGQLKEAILDGTGADDTVLEEMNLPGRWKPKMIGGIGGFIKVKQYDQVPIEICGYKVIGTVLVG  
PTPVNIIGRSLLTRLGCTLNF

>116920\_2 0.2  
PQITLWQRPLVTIKIGGQLKEALLDGTGADDTVLEEMNLPGRWKPRMIGGLGGFIKVRQYDQVPIEICGHKTVGTVLIG  
PTPANIIGRNLLTQLGCTLNF

>87104\_0 0.4  
PQITLWQRPLVAIKIGGQLKEALLDGTGADDTVLEEMNLPGRWKPKMIGGIGGFIKVKQYDQVPIEICGHKAIGTVLVG  
PTPVNIIGRNLLTQLGCTLNF

>206413\_0 0.4  
PQITLWQRPLVTIKVGGQLKEALLDGTGADDTVLEDNLPGRWKPKMIGGIGGFIKVGQYDQVPIEICGHKAIGTVLVG  
PTPVNIIGRNLLTQIGCTLNF

>216593\_0 0.3  
PQITLWQRPLVTIKIGGQLKEALLDGTGADDTVLEDNLPGRWKPKMIGGIGGFIKVGQYDQVPIEICGHKAIGTVLLG  
PTPVNIIGRNLLTQLGCTLNF

>216593\_1 0.3

PQITLWQRPLVTIKIGGQLKEALLDTGADDTVLEDMNLPGRWKPKMIGGIGGFIKVGQYDHILVEICGHKAIGTVLLG  
PTPVNIIGRNLLTQLGCTLNF  
>216593\_2 0.3  
PQITLWQRPLVTIKIGGQLKEALLDTGADDTVLEDMNLPKWKPKMIGGIGGFIKVGQYDHILVEICGHKAIGTVLLG  
PTPVNIIGRNLLTQLGCTLNF  
>216593\_3 0.3  
PQITLWQRPLVTIKIGGQLKEALLDTGADDTVLEDMNLPKWKPKMIGGIGGFIKVGQYDHILVEICGHKAIGTVLLG  
PTPVNIIGRNLLTQLGCTLNF  
>216597\_0 0.4  
PQITLWQRPLVTIKIGGQLKEALLDTGADDTVLEEMDIPGRWKPKMIGGIGGFIKVGQYDQVLEICGHKAIGTVLVG  
PTPVNIIGRNLLTQIGCTLNF  
>216597\_1 0.4  
PQITLWQRPLVTIKIGGQLKEALLDTGADDTVLEEMDIPGRWKPKMIGGIGGFIKVGQYDQVLEICGHKAIGTVLIG  
PTPVNIIGRNLLTQIGCTLNF  
>216597\_2 0.4  
PQITLWQRPLVTIKIGGQLKEALLDTGADDTVLEEMDIPGRWKPKMIGGIGGFIKVGQYDQVLEICGHKAMGTVLVG  
PTPVNIIGRNLLTQIGCTLNF  
>216597\_3 0.4  
PQITLWQRPLVTIKIGGQLKEALLDTGADDTVLEEMDIPGRWKPKMIGGIGGFIKVGQYDQVLEICGHKAMGTVLIG  
PTPVNIIGRNLLTQIGCTLNF  
>216597\_4 0.4  
PQITLWQRPLVTIKIGGQLKEALLDTGADDTVLEEMDIPGRWKPKMIGGIGGFIKVGQYDQVLEICGHKAVGTVLVG  
PTPVNIIGRNLLTQIGCTLNF  
>216597\_5 0.4  
PQITLWQRPLVTIKIGGQLKEALLDTGADDTVLEEMDIPGRWKPKMIGGIGGFIKVGQYDQVLEICGHKAVGTVLIG  
PTPVNIIGRNLLTQIGCTLNF  
>216597\_12 0.4  
PQITLWQRPLVTIKIGGQLKEALLDTGADDTVLEEMDIPGRWKPKMIGGIGGFIKVGQYDQVLEICGHKAIGTVLVG  
PTPVNIIGRNLLTQIGCTLNF  
>216597\_13 0.4  
PQITLWQRPLVTIKIGGQLKEALLDTGADDTVLEEMDIPGRWKPKMIGGIGGFIKVGQYDQVLEICGHKAIGTVLIG  
PTPVNIIGRNLLTQIGCTLNF  
>216597\_14 0.4  
PQITLWQRPLVTIKIGGQLKEALLDTGADDTVLEEMDIPGRWKPKMIGGIGGFIKVGQYDQVLEICGHKAMGTVLVG  
PTPVNIIGRNLLTQIGCTLNF  
>216597\_15 0.4  
PQITLWQRPLVTIKIGGQLKEALLDTGADDTVLEEMDIPGRWKPKMIGGIGGFIKVGQYDQVLEICGHKAMGTVLIG  
PTPVNIIGRNLLTQIGCTLNF  
>216597\_16 0.4  
PQITLWQRPLVTIKIGGQLKEALLDTGADDTVLEEMDIPGRWKPKMIGGIGGFIKVGQYDQVLEICGHKAVGTVLVG  
PTPVNIIGRNLLTQIGCTLNF  
>216597\_17 0.4  
PQITLWQRPLVTIKIGGQLKEALLDTGADDTVLEEMDIPGRWKPKMIGGIGGFIKVGQYDQVLEICGHKAVGTVLIG  
PTPVNIIGRNLLTQIGCTLNF  
>216597\_24 0.4  
PQITLWQRPLVTIKIGGQLKEALLDTGADDTVLEEMDIPGKWKPKMIGGIGGFIKVGQYDQVLEICGHKAIGTVLVG  
PTPVNIIGRNLLTQIGCTLNF  
>216597\_25 0.4  
PQITLWQRPLVTIKIGGQLKEALLDTGADDTVLEEMDIPGKWKPKMIGGIGGFIKVGQYDQVLEICGHKAIGTVLIG  
PTPVNIIGRNLLTQIGCTLNF  
>216597\_26 0.4  
PQITLWQRPLVTIKIGGQLKEALLDTGADDTVLEEMDIPGKWKPKMIGGIGGFIKVGQYDQVLEICGHKAMGTVLVG  
PTPVNIIGRNLLTQIGCTLNF  
>216597\_27 0.4  
PQITLWQRPLVTIKIGGQLKEALLDTGADDTVLEEMDIPGKWKPKMIGGIGGFIKVGQYDQVLEICGHKAMGTVLIG  
PTPVNIIGRNLLTQIGCTLNF  
>216597\_28 0.4  
PQITLWQRPLVTIKIGGQLKEALLDTGADDTVLEEMDIPGKWKPKMIGGIGGFIKVGQYDQVLEICGHKAVGTVLVG  
PTPVNIIGRNLLTQIGCTLNF  
>216597\_29 0.4  
PQITLWQRPLVTIKIGGQLKEALLDTGADDTVLEEMDIPGKWKPKMIGGIGGFIKVGQYDQVLEICGHKAVGTVLIG  
PTPVNIIGRNLLTQIGCTLNF  
>216597\_36 0.4

PQITLWQRPLVTIKIGGQLKEALLDTGADDTVLEEMDIPGKWKPKMIGGIGGFIKVGQYDQVLVEICGHKAIGTVLVG  
PTPVNIIGRNLLTQIGCTLNF  
>216597\_37 0.4  
PQITLWQRPLVTIKIGGQLKEALLDTGADDTVLEEMDIPGKWKPKMIGGIGGFIKVGQYDQVLVEICGHKAIGTVLIG  
PTPVNIIGRNLLTQIGCTLNF  
>216597\_38 0.4  
PQITLWQRPLVTIKIGGQLKEALLDTGADDTVLEEMDIPGKWKPKMIGGIGGFIKVGQYDQVLVEICGHKAMGTVLVG  
PTPVNIIGRNLLTQIGCTLNF  
>216597\_39 0.4  
PQITLWQRPLVTIKIGGQLKEALLDTGADDTVLEEMDIPGKWKPKMIGGIGGFIKVGQYDQVLVEICGHKAMGTVLIG  
PTPVNIIGRNLLTQIGCTLNF  
>216597\_60 0.4  
PQITLWQRPLVTIKIGGQLKEALLDTGADDTVLEEMDMPGRWKPKMIGGIGGFIKVGQYDQVLVEICGHKAIGTVLVG  
PTPVNIIGRNLLTQIGCTLNF  
>216597\_326 0.4  
PQITLWQRPLVTIKIGGQLKEALLDTGADDTVLEEMRIPGKWKPKMIGGIGGFIKVGQYDQVLVEICGHKAMGTVLVG  
PTPVNIIGRNLLTQIGCTLNF  
>216597\_327 0.4  
PQITLWQRPLVTIKIGGQLKEALLDTGADDTVLEEMRIPGKWKPKMIGGIGGFIKVGQYDQVLVEICGHKAMGTVLIG  
PTPVNIIGRNLLTQIGCTLNF  
>216597\_328 0.4  
PQITLWQRPLVTIKIGGQLKEALLDTGADDTVLEEMRIPGKWKPKMIGGIGGFIKVGQYDQVLVEICGHKAVGTVLVG  
PTPVNIIGRNLLTQIGCTLNF  
>216597\_329 0.4  
PQITLWQRPLVTIKIGGQLKEALLDTGADDTVLEEMRIPGKWKPKMIGGIGGFIKVGQYDQVLVEICGHKAVGTVLIG  
PTPVNIIGRNLLTQIGCTLNF  
>216597\_336 0.4  
PQITLWQRPLVTIKIGGQLKEALLDTGADDTVLEEMRMPGRWKPKMIGGIGGFIKVGQYDQVLVEICGHKAIGTVLVG  
PTPVNIIGRNLLTQIGCTLNF  
>216597\_337 0.4  
PQITLWQRPLVTIKIGGQLKEALLDTGADDTVLEEMRMPGRWKPKMIGGIGGFIKVGQYDQVLVEICGHKAIGTVLIG  
PTPVNIIGRNLLTQIGCTLNF  
>216597\_338 0.4  
PQITLWQRPLVTIKIGGQLKEALLDTGADDTVLEEMRMPGRWKPKMIGGIGGFIKVGQYDQVLVEICGHKAMGTVLVG  
PTPVNIIGRNLLTQIGCTLNF  
>216597\_339 0.4  
PQITLWQRPLVTIKIGGQLKEALLDTGADDTVLEEMRMPGRWKPKMIGGIGGFIKVGQYDQVLVEICGHKAMGTVLIG  
PTPVNIIGRNLLTQIGCTLNF  
>216597\_340 0.4  
PQITLWQRPLVTIKIGGQLKEALLDTGADDTVLEEMRMPGRWKPKMIGGIGGFIKVGQYDQVLVEICGHKAVGTVLVG  
PTPVNIIGRNLLTQIGCTLNF  
>216597\_341 0.4  
PQITLWQRPLVTIKIGGQLKEALLDTGADDTVLEEMRMPGRWKPKMIGGIGGFIKVGQYDQVLVEICGHKAVGTVLIG  
PTPVNIIGRNLLTQIGCTLNF  
>216597\_348 0.4  
PQITLWQRPLVTIKIGGQLKEALLDTGADDTVLEEMRMPGRWKPKMIGGIGGFIKVGQYDQVLVEICGHKAIGTVLVG  
PTPVNIIGRNLLTQIGCTLNF  
>216597\_349 0.4  
PQITLWQRPLVTIKIGGQLKEALLDTGADDTVLEEMRMPGRWKPKMIGGIGGFIKVGQYDQVLVEICGHKAIGTVLIG  
PTPVNIIGRNLLTQIGCTLNF  
>216597\_350 0.4  
PQITLWQRPLVTIKIGGQLKEALLDTGADDTVLEEMRMPGRWKPKMIGGIGGFIKVGQYDQVLVEICGHKAMGTVLVG  
PTPVNIIGRNLLTQIGCTLNF  
>216597\_351 0.4  
PQITLWQRPLVTIKIGGQLKEALLDTGADDTVLEEMRMPGRWKPKMIGGIGGFIKVGQYDQVLVEICGHKAMGTVLIG  
PTPVNIIGRNLLTQIGCTLNF  
>216597\_352 0.4  
PQITLWQRPLVTIKIGGQLKEALLDTGADDTVLEEMRMPGRWKPKMIGGIGGFIKVGQYDQVLVEICGHKAVGTVLVG  
PTPVNIIGRNLLTQIGCTLNF  
>216597\_400 0.4  
PQITLWQRPLVTIKIGGQLKEALLDTGADDTVLEEMDIPGRWKPKMIGGIGGFIKVGQYDQVLVEICGHKAVGTVLVG  
PTPVNIIGRNLLTQIGCTLNF  
>216597\_401 0.4

PQITLWQRPLVTIKVGGQLKEALLDTGADDTVLEEMDIPGRWKPKMIGGIGGFIKVGQYDQVLVEICGHKAVGTVLIG  
PTPVNIIGRNLLTQIGCTLNF  
>216597\_408 0.4  
PQITLWQRPLVTIKVGGQLKEALLDTGADDTVLEEMDIPGKWKPKMIGGIGGFIKVGQYDQVLIEICGHKAIGTVLVG  
PTPVNIIGRNLLTQIGCTLNF  
>216597\_409 0.4  
PQITLWQRPLVTIKVGGQLKEALLDTGADDTVLEEMDIPGKWKPKMIGGIGGFIKVGQYDQVLIEICGHKAIGTVLIG  
PTPVNIIGRNLLTQIGCTLNF  
>259193\_0 0.3  
PQITLWQRPLVTIKIGGQIKEALLDTGADDTVLEEIDLPKWKPKMIGGIGGFIKVGQYDEILVEICGHKAIGTVLVG  
PTPVNIIGRNLLTQIGCTLNF  
>259193\_1 0.3  
PQITLWQRPLVTIKIGGQIKEALLDTGADDTVLEEIDLPKWKPKMIGGIGGFIKVGQYDEILVEIWGHKAIGTVLVG  
PTPVNIIGRNLLTQIGCTLNF  
>259193\_2 0.3  
PQITLWQRPLVTIKIGGQIKEALLDTGADDTVLEEIDLPKWKPKMIGGIGGFIKVGQYDEILVDICGHKAIGTVLVG  
PTPVNIIGRNLLTQIGCTLNF  
>259193\_3 0.3  
PQITLWQRPLVTIKIGGQIKEALLDTGADDTVLEEIDLPKWKPKMIGGIGGFIKVGQYDEILVDIWDGHKAIGTVLVG  
PTPVNIIGRNLLTQIGCTLNF  
>109484\_0 0.3  
PQITLWQRPLVTIKIGGQLKEALLDTGADDTVLEEMNLPGRWKPKMIGGIGGFIKVRQYDQIPIEICGHKATGTVLIG  
PTPVNIIGRNLLTQLGCTLNF  
>116505\_0 0.3  
PQITLWQRPLVTIKIGGQLKEALLDTGADDTVLEEMNLPGRWKPKMIGGIGGFIKVRQYDQIPIEICGHKAEGTVLVG  
PTPVNIIGRNLLTQIGCTLNF  
>116505\_1 0.3  
PQITLWQRPLVTIKIGGQLKEALLDTGADDTVLEEMSLPGRWKPKMIGGIGGFIKVRQYDQIPIEICGHKAEGTVLVG  
PTPVNIIGRNLLTQIGCTLNF  
>145683\_0 0.3  
PQITLWQRPIVTIKIGGQLKEALLDTGADDTVLEEMNLPGRWKPKMIGGIGGFIKVRQYDQIAIEICGHKAIGTVLVG  
PTPVNIIGRNLLTQLGCTLNF  
>145683\_1 0.3  
PQITLWQRPIVTIKIGGQLKEALLDTGADDTVLEEINLPGRWKPKMIGGIGGFIKVRQYDQIAIEICGHKAIGTVLVG  
PTPVNIIGRNLLTQLGCTLNF  
>198527\_0 0.3  
PQITLWQRPLVTIKIGGQLKEALLDTGADDTVLEEMNLPGRWKPKMIGGIGGFIKVRQYDEV TIDICGHKAIGTVLIG  
PTPVNIIGRNLLTQIGCTLNF  
>116920\_0 0.2  
PQITLWQRPLVTIKIGGQLKEALLDTGADDTVLEEMNLPGRWKPRMIGGLGGFIKVRQYDQVPIEICGHKIVGTVLIG  
PTPANIIGRNLLTQLGCTLNF  
>257927\_0 0.3  
PQITLWQRPLVTIRIGGQLKEALLDTGADDTVLEEMNLPGRWKPKMIGGIGGFIKVGQYDQIPLEICGHKAVGTVLIG  
PTPVNIIGRNLLTQIGCTLNF  
>187173\_0 0.2  
PQITLWQRPLVTIKIGGQLKEALLDTGADDTVLEDINLPKWKPKMIGGIGGFIKVRQYDQILIEICGKKAIGTVLVG  
PTPVNIIGRNMLTQIGCTLNF  
>187173\_1 0.2  
PQITLWQRPLVTIKIGGQLKEALLDTGADDTVLEDINLPKWKPKMIGGIGGFIKVRQYDQILIEICGKKAIGTVLIG  
PTPVNIIGRNMLTQIGCTLNF  
>187173\_2 0.2  
PQITLWQRPLVTIKIGGQLKEALLDTGADDTVLEDINLPGNWKPKMIGGIGGFIKVRQYDQILIEICGKKAIGTVLVG  
PTPVNIIGRNMLTQIGCTLNF  
>187173\_3 0.2  
PQITLWQRPLVTIKIGGQLKEALLDTGADDTVLEDINLPGNWKPKMIGGIGGFIKVRQYDQILIEICGKKAIGTVLIG  
PTPVNIIGRNMLTQIGCTLNF  
>187173\_4 0.2  
PQITLWQRPLVTIKIGGQLTEALLDTGADDTVLEDINLPKWKPKMIGGIGGFIKVRQYDQILIEICGKKAIGTVLVG  
PTPVNIIGRNMLTQIGCTLNF  
>187173\_5 0.2  
PQITLWQRPLVTIKIGGQLTEALLDTGADDTVLEDINLPKWKPKMIGGIGGFIKVRQYDQILIEICGKKAIGTVLIG  
PTPVNIIGRNMLTQIGCTLNF  
>187173\_6 0.2

PQITLWQRPLVTVKIGGQLTEALLDTGADDTVLEDINLPGNWPKMIGGIGGFIKVRQYDQILIEICGKKAIGTVLVG  
PTPVNIIGRNMLTQIGCTLNF  
>187173\_7 0.2  
PQITLWQRPLVTVKIGGQLTEALLDTGADDTVLEDINLPGNWPKMIGGIGGFIKVRQYDQILIEICGKKAIGTVLIG  
PTPVNIIGRNMLTQIGCTLNF  
>187173\_8 0.2  
PQITLWQRPLVTVRIGGQLKEALLDTGADDTVLEDINLPGKWKPKMIGGIGGFIKVRQYDQILIEICGKKAIGTVLVG  
PTPVNIIGRNMLTQIGCTLNF  
>187173\_9 0.2  
PQITLWQRPLVTVRIGGQLKEALLDTGADDTVLEDINLPGKWKPKMIGGIGGFIKVRQYDQILIEICGKKAIGTVLIG  
PTPVNIIGRNMLTQIGCTLNF  
>187173\_10 0.2  
PQITLWQRPLVTVRIGGQLKEALLDTGADDTVLEDINLPGNWPKMIGGIGGFIKVRQYDQILIEICGKKAIGTVLVG  
PTPVNIIGRNMLTQIGCTLNF  
>187173\_11 0.2  
PQITLWQRPLVTVRIGGQLKEALLDTGADDTVLEDINLPGNWPKMIGGIGGFIKVRQYDQILIEICGKKAIGTVLIG  
PTPVNIIGRNMLTQIGCTLNF  
>187173\_12 0.2  
PQITLWQRPLVTVRIGGQLTEALLDTGADDTVLEDINLPGKWKPKMIGGIGGFIKVRQYDQILIEICGKKAIGTVLVG  
PTPVNIIGRNMLTQIGCTLNF  
>187173\_13 0.2  
PQITLWQRPLVTVRIGGQLTEALLDTGADDTVLEDINLPGKWKPKMIGGIGGFIKVRQYDQILIEICGKKAIGTVLIG  
PTPVNIIGRNMLTQIGCTLNF  
>187173\_14 0.2  
PQITLWQRPLVTVRIGGQLTEALLDTGADDTVLEDINLPGNWPKMIGGIGGFIKVRQYDQILIEICGKKAIGTVLVG  
PTPVNIIGRNMLTQIGCTLNF  
>187173\_15 0.2  
PQITLWQRPLVTVRIGGQLTEALLDTGADDTVLEDINLPGNWPKMIGGIGGFIKVRQYDQILIEICGKKAIGTVLIG  
PTPVNIIGRNMLTQIGCTLNF  
>187173\_16 0.2  
PQITLWQRPIVTVKIGGQLKEALLDTGADDTVLEDINLPGKWKPKMIGGIGGFIKVRQYDQILIEICGKKAIGTVLVG  
PTPVNIIGRNMLTQIGCTLNF  
>187173\_17 0.2  
PQITLWQRPIVTVKIGGQLKEALLDTGADDTVLEDINLPGKWKPKMIGGIGGFIKVRQYDQILIEICGKKAIGTVLIG  
PTPVNIIGRNMLTQIGCTLNF  
>187173\_18 0.2  
PQITLWQRPIVTVKIGGQLKEALLDTGADDTVLEDINLPGNWPKMIGGIGGFIKVRQYDQILIEICGKKAIGTVLVG  
PTPVNIIGRNMLTQIGCTLNF  
>187173\_19 0.2  
PQITLWQRPIVTVKIGGQLKEALLDTGADDTVLEDINLPGNWPKMIGGIGGFIKVRQYDQILIEICGKKAIGTVLIG  
PTPVNIIGRNMLTQIGCTLNF  
>187173\_20 0.2  
PQITLWQRPIVTVKIGGQLTEALLDTGADDTVLEDINLPGKWKPKMIGGIGGFIKVRQYDQILIEICGKKAIGTVLVG  
PTPVNIIGRNMLTQIGCTLNF  
>187173\_21 0.2  
PQITLWQRPIVTVKIGGQLTEALLDTGADDTVLEDINLPGKWKPKMIGGIGGFIKVRQYDQILIEICGKKAIGTVLIG  
PTPVNIIGRNMLTQIGCTLNF  
>187173\_22 0.2  
PQITLWQRPIVTVKIGGQLTEALLDTGADDTVLEDINLPGNWPKMIGGIGGFIKVRQYDQILIEICGKKAIGTVLVG  
PTPVNIIGRNMLTQIGCTLNF  
>187173\_23 0.2  
PQITLWQRPIVTVKIGGQLTEALLDTGADDTVLEDINLPGNWPKMIGGIGGFIKVRQYDQILIEICGKKAIGTVLIG  
PTPVNIIGRNMLTQIGCTLNF  
>187173\_24 0.2  
PQITLWQRPIVTVRIGGQLKEALLDTGADDTVLEDINLPGKWKPKMIGGIGGFIKVRQYDQILIEICGKKAIGTVLVG  
PTPVNIIGRNMLTQIGCTLNF  
>187173\_25 0.2  
PQITLWQRPIVTVRIGGQLKEALLDTGADDTVLEDINLPGKWKPKMIGGIGGFIKVRQYDQILIEICGKKAIGTVLIG  
PTPVNIIGRNMLTQIGCTLNF  
>187173\_26 0.2  
PQITLWQRPIVTVRIGGQLKEALLDTGADDTVLEDINLPGNWPKMIGGIGGFIKVRQYDQILIEICGKKAIGTVLVG  
PTPVNIIGRNMLTQIGCTLNF  
>187173\_27 0.2

PQITLWQRPIVTVRIGGQLKEALLDTGADDTVLEDINLPGNWKPKMIGGIGGFIKVRQYDQILIEICGKKAIGTVLIG  
PTPVNIIGRNMLTQIGCTLNF  
>187173\_28 0.2  
PQITLWQRPIVTVRIGGQLTEALLDTGADDTVLEDINLPGKWKPKMIGGIGGFIKVRQYDQILIEICGKKAIGTVLVG  
PTPVNIIGRNMLTQIGCTLNF  
>187173\_29 0.2  
PQITLWQRPIVTVRIGGQLTEALLDTGADDTVLEDINLPGKWKPKMIGGIGGFIKVRQYDQILIEICGKKAIGTVLIG  
PTPVNIIGRNMLTQIGCTLNF  
>187173\_30 0.2  
PQITLWQRPIVTVRIGGQLTEALLDTGADDTVLEDINLPGNWKPKMIGGIGGFIKVRQYDQILIEICGKKAIGTVLVG  
PTPVNIIGRNMLTQIGCTLNF  
>187173\_31 0.2  
PQITLWQRPIVTVRIGGQLTEALLDTGADDTVLEDINLPGNWKPKMIGGIGGFIKVRQYDQILIEICGKKAIGTVLIG  
PTPVNIIGRNMLTQIGCTLNF

**Sequences for the FPV-resistant ensemble**

>235731\_150 200.0  
PQITLWQRPFVTVTVGGQTTEALLDTGADDTILEDIPLPGRWIPKIIGGIGGLIKVGQYDQIPIEIFGHTVIGTVLVG  
ATPVNVIGRNLMTRIGCTLNF  
>235731\_152 200.0  
PQITLWQRPFVTVTVGGQTTEALLDTGADDTILEDIPLPGRWIPKIIGGIGGLIKVGQYDQIPIEIFGQTVIGTVLVG  
ATPVNVIGRNLMTRIGCTLNF  
>235731\_153 200.0  
PQITLWQRPFVTVTVGGQTTEALLDTGADDTILEDIPLPGRWIPKIIGGIGGLIRVGQYDQIPIEIFGHTVIGTVLVG  
ATPVNVIGRNLMTRIGCTLNF  
>235685\_1 200.0  
PQITLWQRPFVTVKVGQQTTEALLDTGADDTIFEDINLPGRWIPKIIGGIGGLIKVGQYDQIPIEIFGLTVIGTVLVG  
ATPVNVIGRNLMTRIGCTLNF  
>235685\_4 200.0  
PQITLWQRPFVTVKVGQQTTEALLDTGADDTIFEDINLPGRWIPKIIGGIGGLIRVGQYDQIPIEIFGLTVIGTVLVG  
ATPVNVIGRNLMTRIGCTLNF  
>235685\_13 200.0  
PQITLWQRPFVTVKVGQQTTEALLDTGADDTIFEDIHLPGRWIPKIIGGIGGLIKVGQYDQIPIEIFGLTVIGTVLVG  
ATPVNVIGRNLMTRIGCTLNF  
>235685\_16 200.0  
PQITLWQRPFVTVKVGQQTTEALLDTGADDTIFEDIHLPGRWIPKIIGGIGGLIRVGQYDQIPIEIFGLTVIGTVLVG  
ATPVNVIGRNLMTRIGCTLNF  
>235685\_25 200.0  
PQITLWQRPFVTVTVGGQTTEALLDTGADDTIFEDINLPGRWIPKIIGGIGGLIKVGQYDQIPIEIFGLTVIGTVLVG  
ATPVNVIGRNLMTRIGCTLNF  
>235685\_28 200.0  
PQITLWQRPFVTVTVGGQTTEALLDTGADDTIFEDINLPGRWIPKIIGGIGGLIRVGQYDQIPIEIFGLTVIGTVLVG  
ATPVNVIGRNLMTRIGCTLNF  
>235685\_37 200.0  
PQITLWQRPFVTVTVGGQTTEALLDTGADDTIFEDIHLPGRWIPKIIGGIGGLIKVGQYDQIPIEIFGLTVIGTVLVG  
ATPVNVIGRNLMTRIGCTLNF  
>235685\_40 200.0  
PQITLWQRPFVTVTVGGQTTEALLDTGADDTIFEDIHLPGRWIPKIIGGIGGLIRVGQYDQIPIEIFGLTVIGTVLVG  
ATPVNVIGRNLMTRIGCTLNF  
>235731\_1 200.0  
PQITLWQRPFVTVKVGQQTTEALLDTGADDTILEDINLPGRWIPKIIGGIGGFIKVGQYDQIPIEIFGLTVIGTVLVG  
ATPVNVIGRNLMTRIGCTLNF  
>235731\_4 200.0  
PQITLWQRPFVTVKVGQQTTEALLDTGADDTILEDINLPGRWIPKIIGGIGGFIKVGQYDQIPIEIFGLTVIGTVLVG  
ATPVNVIGRNLMTRIGCTLNF  
>235731\_7 200.0  
PQITLWQRPFVTVKVGQQTTEALLDTGADDTILEDINLPGRWIPKIIGGIGGLIKVGQYDQIPIEIFGLTVIGTVLVG  
ATPVNVIGRNLMTRIGCTLNF  
>235731\_10 200.0  
PQITLWQRPFVTVKVGQQTTEALLDTGADDTILEDINLPGRWIPKIIGGIGGLIRVGQYDQIPIEIFGLTVIGTVLVG  
ATPVNVIGRNLMTRIGCTLNF  
>235731\_25 200.0  
PQITLWQRPFVTVKVGQQTTEALLDTGADDTILEDIHLPGRWIPKIIGGIGGFIKVGQYDQIPIEIFGLTVIGTVLVG



ATPVNVIGRNLMTTRIGCTLNF  
>117039\_1 400.0  
PQITLWQRPLITVKIGGQLVEALMDTGADDTIFEGINLPGRWKPKMIGGIGGFLNVRQYEQIPIEIGGHKILSTVLVG  
STPVNVIGRNVMSKIGCTLNF  
>117039\_3 400.0  
PQITLWQRPVITVKIGGQLVEALMDTGADDTIFEGINLPGRWKPKMIGGIGGFLNVRQYEQIPIEIGGHKILSTVLVG  
STPVNVIGRNVMSKIGCTLNF  
>235731\_177 200.0  
PQITLWQRPFVTVTVGGQTTEALLDTGADDTILEDITLPGRWIPKIIGGIGGLIRVGQYDQIPIEIFGHTVIGTVLVG  
ATPVNVIGRNLMTTRIGCTLNF  
>235731\_179 200.0  
PQITLWQRPFVTVTVGGQTTEALLDTGADDTILEDITLPGRWIPKIIGGIGGLIRVGQYDQIPIEIFGQTVIGTVLVG  
ATPVNVIGRNLMTTRIGCTLNF  
>205693\_0 200.0  
PQITLWQRPFIPVKIGGQQMEALLDTGADDTILEEINLPGRWTPKIVGGIGGFMRVGQYDQIPIEICGQKIIGTVLVG  
PTPANIIGRNVMTQIGCTLNF  
>205693\_1 200.0  
PQITLWQRPFIPVKIGGQQMEALLDTGADDTILEEINLPGRWTPKIVGGIGGFMRVGQYDQIPIEYIGQKIIGTVLVG  
PTPANIIGRNVMTQIGCTLNF  
>235685\_7 200.0  
PQITLWQRPFVTVKVGQTTEALLDTGADDTIFEDINLPGRWTPKIIGGIGGLIKVGQYDQIPIEIFGLTVIGTVLVG  
ATPVNVIGRNLMTTRIGCTLNF  
>235685\_10 200.0  
PQITLWQRPFVTVKVGQTTEALLDTGADDTIFEDINLPGRWTPKIIGGIGGLIRVGQYDQIPIEIFGLTVIGTVLVG  
ATPVNVIGRNLMTTRIGCTLNF  
>235685\_19 200.0  
PQITLWQRPFVTVKVGQTTEALLDTGADDTIFEDIHLPGRWTPKIIGGIGGLIKVGQYDQIPIEIFGLTVIGTVLVG  
ATPVNVIGRNLMTTRIGCTLNF  
>235685\_22 200.0  
PQITLWQRPFVTVKVGQTTEALLDTGADDTIFEDIHLPGRWTPKIIGGIGGLIRVGQYDQIPIEIFGLTVIGTVLVG  
ATPVNVIGRNLMTTRIGCTLNF  
>235685\_31 200.0  
PQITLWQRPFVTVTVGGQTTEALLDTGADDTIFEDINLPGRWTPKIIGGIGGLIKVGQYDQIPIEIFGLTVIGTVLVG  
ATPVNVIGRNLMTTRIGCTLNF  
>235685\_34 200.0  
PQITLWQRPFVTVTVGGQTTEALLDTGADDTIFEDINLPGRWTPKIIGGIGGLIRVGQYDQIPIEIFGLTVIGTVLVG  
ATPVNVIGRNLMTTRIGCTLNF  
>235685\_43 200.0  
PQITLWQRPFVTVTVGGQTTEALLDTGADDTIFEDIHLPGRWTPKIIGGIGGLIKVGQYDQIPIEIFGLTVIGTVLVG  
ATPVNVIGRNLMTTRIGCTLNF  
>235685\_46 200.0  
PQITLWQRPFVTVTVGGQTTEALLDTGADDTIFEDIHLPGRWTPKIIGGIGGLIRVGQYDQIPIEIFGLTVIGTVLVG  
ATPVNVIGRNLMTTRIGCTLNF  
>235731\_13 200.0  
PQITLWQRPFVTVKVGQTTEALLDTGADDTILEDINLPGRWTPKIIGGIGGFIKVGQYDQIPIEIFGLTVIGTVLVG  
ATPVNVIGRNLMTTRIGCTLNF  
>235731\_16 200.0  
PQITLWQRPFVTVKVGQTTEALLDTGADDTILEDINLPGRWTPKIIGGIGGFIRVGQYDQIPIEIFGLTVIGTVLVG  
ATPVNVIGRNLMTTRIGCTLNF  
>235731\_19 200.0  
PQITLWQRPFVTVKVGQTTEALLDTGADDTILEDINLPGRWTPKIIGGIGGLIKVGQYDQIPIEIFGLTVIGTVLVG  
ATPVNVIGRNLMTTRIGCTLNF  
>235731\_85 200.0  
PQITLWQRPFVTVKVGQTTEALLDTGADDTILEDITLPGRWTPKIIGGIGGFIKVGQYDQIPIEIFGLTVIGTVLVG  
ATPVNVIGRNLMTTRIGCTLNF  
>117039\_0 400.0  
PQITLWQRPLITVKIGGQLVEALMDTGADDTIFEGINLPGRWKPKMIGGIGGFLNVRQYEQIPIEICGHKILSTVLVG  
STPVNVIGRNVMSKIGCTLNF  
>117039\_2 400.0  
PQITLWQRPVITVKIGGQLVEALMDTGADDTIFEGINLPGRWKPKMIGGIGGFLNVRQYEQIPIEICGHKILSTVLVG  
STPVNVIGRNVMSKIGCTLNF  
>117075\_0 400.0  
PQITLWQRPLITVKIGGQLVEALMDTGADDTIFEGINLPGRWKPKMIGGIGGFLNVRQYEQIPIEICGHKILSTVLVG

STPLNVIGRNVMSKIGCTLNF  
>117075\_1 400.0  
PQITLWQRPLITVKIGGQLVEALMDTGADDTIFEGINLPGRWKPKMIGGIGGFLNVREYEQIPIEICGHKILSTVLVG  
STPLNVIGRNVMSKIGCTLNF  
>117075\_2 400.0  
PQITLWQRPLITVKVGGQLVEALMDTGADDTIFEGINLPGRWKPKMIGGIGGFLNVRQYEQIPIEICGHKILSTVLVG  
STPLNVIGRNVMSKIGCTLNF  
>117075\_3 400.0  
PQITLWQRPLITVKVGGQLVEALMDTGADDTIFEGINLPGRWKPKMIGGIGGFLNVREYEQIPIEICGHKILSTVLVG  
STPLNVIGRNVMSKIGCTLNF  
>117075\_4 400.0  
PQITLWQRPFITVKIGGQLVEALMDTGADDTIFEGINLPGRWKPKMIGGIGGFLNVRQYEQIPIEICGHKILSTVLVG  
STPLNVIGRNVMSKIGCTLNF  
>117075\_5 400.0  
PQITLWQRPFITVKVGGQLVEALMDTGADDTIFEGINLPGRWKPKMIGGIGGFLNVREYEQIPIEICGHKILSTVLVG  
STPLNVIGRNVMSKIGCTLNF  
>117075\_6 400.0  
PQITLWQRPFITVKVGGQLVEALMDTGADDTIFEGINLPGRWKPKMIGGIGGFLNVRQYEQIPIEICGHKILSTVLVG  
STPLNVIGRNVMSKIGCTLNF  
>117075\_7 400.0  
PQITLWQRPFITVKVGGQLVEALMDTGADDTIFEGINLPGRWKPKMIGGIGGFLNVREYEQIPIEICGHKILSTVLVG  
STPLNVIGRNVMSKIGCTLNF  
>117075\_8 400.0  
PQITLWQRPVITVKIGGQLVEALMDTGADDTIFEGINLPGRWKPKMIGGIGGFLNVRQYEQIPIEICGHKILSTVLVG  
STPLNVIGRNVMSKIGCTLNF  
>117075\_9 400.0  
PQITLWQRPVITVKVGGQLVEALMDTGADDTIFEGINLPGRWKPKMIGGIGGFLNVREYEQIPIEICGHKILSTVLVG  
STPLNVIGRNVMSKIGCTLNF  
>117075\_10 400.0  
PQITLWQRPVITVKVGGQLVEALMDTGADDTIFEGINLPGRWKPKMIGGIGGFLNVRQYEQIPIEICGHKILSTVLVG  
STPLNVIGRNVMSKIGCTLNF  
>117075\_11 400.0  
PQITLWQRPVITVKVGGQLVEALMDTGADDTIFEGINLPGRWKPKMIGGIGGFLNVREYEQIPIEICGHKILSTVLVG  
STPLNVIGRNVMSKIGCTLNF  
>54177\_0 252.2  
PQITLWQRPVVTIKIGGQLIEALLDTGADDTVLEEINLPGRWKPKIIGGIGGFIKVRQYDQILIEICGHKVISTVVVG  
PTPVNAIGRNLLTQIGCTLNF  
>235731\_119 200.0  
PQITLWQRPFVTVTVGGQTTEALLDTGADDTILEDINLPGRWTPKIIGGIGGLIRVGQYDQIPIEIFGQTVIGTVLVG  
ATPVNVIGRNLMTQIGCTLNF  
>117133\_0 400.0  
PQITLWQRPVVVVKVGGQLMEALLDTGADDTIFEEMNLPGRWTPKIVGGIGGFMKVRQYENVPIEYGGKILSTVLIG  
PTPANIIGRNVMTQIGCTLNF  
>117063\_1 400.0  
PQITLWQRPVVTVKAVAGQLREALLDTGADDTIFEENLPGRWTPKIVGGIGGFMKVRQYDQIPIEICGHKVISTVLVG  
PTPTNIIIGNLMTQIGCTLNF  
>98601\_0 400.0  
PQITLWQRPFVTVIKIGGQLIEALLDTGADDTVLEEMNLPGRWKPKIIGGIGGFMKVRQYDQIPIEICGHKVITTVLIG  
PTPVNAIGRNLLTQIGCTLNF  
>103779\_0 400.0  
PQITLWQRPIIKVKIGGQLVEALLDTGADDTILEGINLPGRWKPKIVGGIGGFMKVKEYDQIPVEICGHKIISTVLVG  
PTPVNIIIGRNVMTQIGCTLNF  
>103779\_1 400.0  
PQITLWQRPIIKVKIGGQLVEALLDTGADDTILEGINLPGRWKPKIVGGIGGFMKVKEYDQIPVEICGHKIISTVLVG  
PTPVNVIGRNVMTQIGCTLNF  
>103779\_2 400.0  
PQITLWQRPIIKVKIGGQLVEALLDTGADDTILEGINLPGRWKPKIVGGIGGFMKVKEYDQIPVEICGHKVISTVLVG  
PTPVNIIIGRNVMTQIGCTLNF  
>103779\_3 400.0  
PQITLWQRPIIKVKIGGQLVEALLDTGADDTILEGINLPGRWKPKIVGGIGGFMKVKEYDQIPVEICGHKVISTVLVG  
PTPVNVIGRNVMTQIGCTLNF  
>103779\_4 400.0  
PQITLWQRPIIKVKIGGQLVEALLDTGADDTILEGIDLPGRWKPKIVGGIGGFMKVKEYDQIPVEICGHKIISTVLVG

PTPVNIIGRNVMTQIGCTLNF  
>103779\_5 400.0  
PQITLWQRPIIKVKIGGQLVEALLDTGADDTILEGIDLPGRWKPKIVGGIGGFMKVKEYDQIPVEICGHKIISTVLVG  
PTPVNIIGRNVMTQIGCTLNF  
>103779\_6 400.0  
PQITLWQRPIIKVKIGGQLVEALLDTGADDTILEGIDLPGRWKPKIVGGIGGFMKVKEYDQIPVEICGHKVISTVLVG  
PTPVNIIGRNVMTQIGCTLNF  
>103779\_7 400.0  
PQITLWQRPIIKVKIGGQLVEALLDTGADDTILEGIDLPGRWKPKIVGGIGGFMKVKEYDQIPVEICGHKVISTVLVG  
PTPVNIIGRNVMTQIGCTLNF  
>103779\_8 400.0  
PQITLWQRPIIKVKIGGQLVEALLDTGADDTIFEGINLPGRWKPKIVGGIGGFMKVKEYDQIPVEICGHKIISTVLVG  
PTPVNIIGRNVMTQIGCTLNF  
>103779\_9 400.0  
PQITLWQRPIIKVKIGGQLVEALLDTGADDTIFEGINLPGRWKPKIVGGIGGFMKVKEYDQIPVEICGHKIISTVLVG  
PTPVNIIGRNVMTQIGCTLNF  
>103779\_10 400.0  
PQITLWQRPIIKVKIGGQLVEALLDTGADDTIFEGINLPGRWKPKIVGGIGGFMKVKEYDQIPVEICGHKVISTVLVG  
PTPVNIIGRNVMTQIGCTLNF  
>103779\_11 400.0  
PQITLWQRPIIKVKIGGQLVEALLDTGADDTIFEGINLPGRWKPKIVGGIGGFMKVKEYDQIPVEICGHKVISTVLVG  
PTPVNIIGRNVMTQIGCTLNF  
>103779\_12 400.0  
PQITLWQRPIIKVKIGGQLVEALLDTGADDTIFEGIDLPGRWKPKIVGGIGGFMKVKEYDQIPVEICGHKIISTVLVG  
PTPVNIIGRNVMTQIGCTLNF  
>103779\_13 400.0  
PQITLWQRPIIKVKIGGQLVEALLDTGADDTIFEGIDLPGRWKPKIVGGIGGFMKVKEYDQIPVEICGHKIISTVLVG  
PTPVNIIGRNVMTQIGCTLNF  
>103779\_14 400.0  
PQITLWQRPIIKVKIGGQLVEALLDTGADDTIFEGIDLPGRWKPKIVGGIGGFMKVKEYDQIPVEICGHKVISTVLVG  
PTPVNIIGRNVMTQIGCTLNF  
>103779\_15 400.0  
PQITLWQRPIIKVKIGGQLVEALLDTGADDTIFEGIDLPGRWKPKIVGGIGGFMKVKEYDQIPVEICGHKVISTVLVG  
PTPVNIIGRNVMTQIGCTLNF  
>147550\_0 400.0  
PQITLWQRPIIKVKIGGQLVEALLDTGADDTIFEGIDLPGRWKPKIVGGIGGFMKVKEYDQIPVEICGHKVISTVLVG  
PTPVNIIGRNVMTQIGCTLNF  
>113050\_0 400.0  
PQITLWQRPFVTVKIGGQITEALLDTGADDTILENINLPGRWKPKIIQGIGGFLKVRQYDQIPIEIEGHKVIGSVVVG  
PTPVNIIGRNVMSQLGCTLNF  
>86742\_0 400.0  
PQITLWQRPFITIKIGGQLREALLDTGADDTIFEDIQLPGRWKPKIVGGIGGFLKVKEYEQVPIEICGHKVISTVLTG  
PTPVNIIGRNVMTQLGCTLNF  
>86742\_1 400.0  
PQITLWQRPFITVKIGGQLREALLDTGADDTIFEDIQLPGRWKPKIVGGIGGFLKVKEYEQVPIEICGHKVISTVLTG  
PTPVNIIGRNVMTQLGCTLNF  
>230072\_0 400.0  
PQITLWQRPVITVRVGGQLTEALLDTGADDTIFEENLPGKWKPKLIGGIGGFLKVQYEQIPIEICEHTIMSTVLVG  
PTPVNIIGRNVMTQLGCTLNF  
>66194\_0 300.0  
PQITLWQRPVVDVKVGGQLMEALLDTGADDTIFEEMNLPGRWTPKMGVGGIGGFMKVRQYEDVPIEYGGKILSTVLIG  
PTPANIIGRNVMTQIGCTLNF  
>66194\_1 300.0  
PQITLWQRPVVDVKVGGQLMEALLDTGADDTIFEEMNLPGRWTPKMGVGGIGGFMKVRQYENVPIEYGGKILSTVLIG  
PTPANIIGRNVMTQIGCTLNF  
>66194\_2 300.0  
PQITLWQRPVVDVKVGGQLMEALLDTGADDTIFEEMNLPGRWTPKIVGGIGGFMKVRQYEDVPIEYGGKILSTVLIG  
PTPANIIGRNVMTQIGCTLNF  
>66194\_3 300.0  
PQITLWQRPVVDVKVGGQLMEALLDTGADDTIFEEMNLPGRWTPKIVGGIGGFMKVRQYENVPIEYGGKILSTVLIG  
PTPANIIGRNVMTQIGCTLNF  
>66194\_4 300.0  
PQITLWQRPVVDVKVGGQLMEALLDTGADDTIFEELNLPGRWTPKMGVGGIGGFMKVRQYEDVPIEYGGKILSTVLIG

PTPANIIGRNVMTQIGCTLNF  
>66194\_5 300.0  
PQITLWQRPVVDVKVGGQLMEALLDTGADDTIFEELNLPGRWTPKMVGGIGGFMKVRQYENVPIEYGGKILSTVLIG  
PTPANIIGRNVMTQIGCTLNF  
>66194\_6 300.0  
PQITLWQRPVVDVKVGGQLMEALLDTGADDTIFEELNLPGRWTPKIVGGIGGFMKVRQYEDVPIEYGGKILSTVLIG  
PTPANIIGRNVMTQIGCTLNF  
>66194\_7 300.0  
PQITLWQRPVVDVKVGGQLMEALLDTGADDTIFEELNLPGRWTPKIVGGIGGFMKVRQYENVPIEYGGKILSTVLIG  
PTPANIIGRNVMTQIGCTLNF  
>66194\_8 300.0  
PQITLWQRPVVDVKVGGQLMEALLDTGADDTIFEDMNLPGRWTPKMVGGIGGFMKVRQYEDVPIEYGGKILSTVLIG  
PTPANIIGRNVMTQIGCTLNF  
>66194\_9 300.0  
PQITLWQRPVVDVKVGGQLMEALLDTGADDTIFEDMNLPGRWTPKMVGGIGGFMKVRQYENVPIEYGGKILSTVLIG  
PTPANIIGRNVMTQIGCTLNF  
>66194\_10 300.0  
PQITLWQRPVVDVKVGGQLMEALLDTGADDTIFEDMNLPGRWTPKIVGGIGGFMKVRQYEDVPIEYGGKILSTVLIG  
PTPANIIGRNVMTQIGCTLNF  
>66194\_11 300.0  
PQITLWQRPVVDVKVGGQLMEALLDTGADDTIFEDMNLPGRWTPKIVGGIGGFMKVRQYENVPIEYGGKILSTVLIG  
PTPANIIGRNVMTQIGCTLNF  
>66194\_12 300.0  
PQITLWQRPVVDVKVGGQLMEALLDTGADDTIFEDLNLPGRWTPKMVGGIGGFMKVRQYEDVPIEYGGKILSTVLIG  
PTPANIIGRNVMTQIGCTLNF  
>66194\_13 300.0  
PQITLWQRPVVDVKVGGQLMEALLDTGADDTIFEDLNLPGRWTPKMVGGIGGFMKVRQYENVPIEYGGKILSTVLIG  
PTPANIIGRNVMTQIGCTLNF  
>66194\_14 300.0  
PQITLWQRPVVDVKVGGQLMEALLDTGADDTIFEDLNLPGRWTPKIVGGIGGFMKVRQYEDVPIEYGGKILSTVLIG  
PTPANIIGRNVMTQIGCTLNF  
>66194\_15 300.0  
PQITLWQRPVVDVKVGGQLMEALLDTGADDTIFEDLNLPGRWTPKIVGGIGGFMKVRQYENVPIEYGGKILSTVLIG  
PTPANIIGRNVMTQIGCTLNF  
>81805\_0 300.0  
PQITLWQRPIITVKVGGQLREALLDTGADDTIFEDIDLPGRWTPKIIGGIGGLMKVKQYEQIPIEICGHELIGPVLVG  
PTPANVIGRNVMTQIGCTLNF  
>145212\_1 400.0  
PQITLWQRPIVTVKIAGQLKEALLDTGADDTIFEEMNLPGRWTPKLIGGIGGFLKVRQYDQVPIEICGHKVIGPVLVG  
PTPANVIGRNLMSQIGCTLNF  
>145212\_3 400.0  
PQITLWQRPIVTVRIAGQLKEALLDTGADDTIFEEMNLPGRWTPKLIGGIGGFLKVRQYDQVPIEICGHKVIGPVLVG  
PTPANVIGRNLMSQIGCTLNF  
>145212\_5 400.0  
PQITLWQRPIITVKIAGQLKEALLDTGADDTIFEEMNLPGRWTPKLIGGIGGFLKVRQYDQVPIEICGHKVIGPVLVG  
PTPANVIGRNLMSQIGCTLNF  
>145212\_7 400.0  
PQITLWQRPIITVRIAGQLKEALLDTGADDTIFEEMNLPGRWTPKLIGGIGGFLKVRQYDQVPIEICGHKVIGPVLVG  
PTPANVIGRNLMSQIGCTLNF  
>205630\_0 400.0  
PQITLWQRPIVTVKVGGQLTEALLDTGADDTIFEEMNLPGRWKPKMVGGIGGFIKVGQYDQIPIEF CGHKVISTVLIG  
PTPVNIIIGRNVMTQIGCTLNF  
>205630\_1 400.0  
PQITLWQRPIVTVKVGGQLTEALLDTGADDTIFEEMNLPGRWKPKMVGGIGGFIKVGQYDQIPIEF CGHKVISTVLIG  
PTPVNIIIGRNVMTQIGCTLNF  
>113060\_0 400.0  
PQITLWQRPFVTVKIGGQLREALLDTGADNTIFEEIDLPGRWKPKIIGGIGGFLKVRQYDQIPIEF CGHKTTGTVLVG  
PTPVNVIGRDMMTQLGFTLNF  
>117063\_0 400.0  
PQITLWQRPVVTVKVAGQLREALLDTGADDTIFEELNLPGRWTPKIVGGIGGFMKVRQYDQIPIEF CGHKVISTVLIG  
PTPTNIIIGRNLMTQIGCTLNF  
>98603\_0 400.0  
PQITLWQRPIVTIKIGGQLKEALLDTGADDTVFEEMNLPGRWKPKIIGGIGGFVKVRQYDQIPIEF CGHKVIGTVVVG

PTPVNAIGRNLLTQIGCTLNF

**Sequences for the FPV-susceptible ensemble**

>102782\_168 0.1  
PQITLWQRPIVTIKVEGQLTEAPLDTGADDTVLEDVNLPGRWKPKMIGGLGGFIKVRQYDQIHIEICGHKAIGTVLVG  
PTPVNIIGRNMLTQIGCTLNF

>102782\_169 0.1  
PQITLWQRPIVTIKVEGQLTEAPLDTGADDTVLEDVNLPGRWKPKMIGGLGGFIKVRQYDQIHIEICGHKAIGTVLVG  
PTPVNIIGRSMLTQIGCTLNF

>102782\_170 0.1  
PQITLWQRPIVTIKVEGQLTEAPLDTGADDTVLEDVNLPGRWKPKMIGGLGGFIKVRQYDQIHIEICGHKAIGTVLIG  
PTPVNIIGRNMLTQIGCTLNF

>102782\_171 0.1  
PQITLWQRPIVTIKVEGQLTEAPLDTGADDTVLEDVNLPGRWKPKMIGGLGGFIKVRQYDQIHIEICGHKAIGTVLIG  
PTPVNIIGRSMLTQIGCTLNF

>102782\_176 0.1  
PQITLWQRPIVTIKVEGQLTEAPLDTGADDTVFEDMNLNLPGRWKPKMIGGLGGFIKVRQYDQIHIEICGHKAIGTVLVG  
PTPVNIIGRNMLTQIGCTLNF

>102782\_177 0.1  
PQITLWQRPIVTIKVEGQLTEAPLDTGADDTVFEDMNLNLPGRWKPKMIGGLGGFIKVRQYDQIHIEICGHKAIGTVLVG  
PTPVNIIGRSMLTQIGCTLNF

>102782\_178 0.1  
PQITLWQRPIVTIKVEGQLTEAPLDTGADDTVFEDMNLNLPGRWKPKMIGGLGGFIKVRQYDQIHIEICGHKAIGTVLIG  
PTPVNIIGRNMLTQIGCTLNF

>102782\_179 0.1  
PQITLWQRPIVTIKVEGQLTEAPLDTGADDTVFEDMNLNLPGRWKPKMIGGLGGFIKVRQYDQIHIEICGHKAIGTVLIG  
PTPVNIIGRSMLTQIGCTLNF

>102782\_184 0.1  
PQITLWQRPIVTIKVEGQLTEAPLDTGADDTVFEDVNLPGRWKPKMIGGLGGFIKVRQYDQIHIEICGHKAIGTVLVG  
PTPVNIIGRNMLTQIGCTLNF

>102782\_185 0.1  
PQITLWQRPIVTIKVEGQLTEAPLDTGADDTVFEDVNLPGRWKPKMIGGLGGFIKVRQYDQIHIEICGHKAIGTVLVG  
PTPVNIIGRSMLTQIGCTLNF

>102782\_186 0.1  
PQITLWQRPIVTIKVEGQLTEAPLDTGADDTVFEDVNLPGRWKPKMIGGLGGFIKVRQYDQIHIEICGHKAIGTVLIG  
PTPVNIIGRNMLTQIGCTLNF

>102782\_187 0.1  
PQITLWQRPIVTIKVEGQLTEAPLDTGADDTVFEDVNLPGRWKPKMIGGLGGFIKVRQYDQIHIEICGHKAIGTVLIG  
PTPVNIIGRSMLTQIGCTLNF

>102782\_36 0.1  
PQITLWQRPIVTIKVEGQLKEAPLDTGADDTVLEDMNLNLPGRWKPKMIGGLGGFIKVRQYDQIHIEICGHKVIGTVLVG  
PTPVNIIGRNMLTQIGCTLNF

>102782\_37 0.1  
PQITLWQRPIVTIKVEGQLKEAPLDTGADDTVLEDMNLNLPGRWKPKMIGGLGGFIKVRQYDQIHIEICGHKVIGTVLVG  
PTPVNIIGRSMLTQIGCTLNF

>102782\_38 0.1  
PQITLWQRPIVTIKVEGQLKEAPLDTGADDTVLEDMNLNLPGRWKPKMIGGLGGFIKVRQYDQIHIEICGHKVIGTVLIG  
PTPVNIIGRNMLTQIGCTLNF

>102782\_39 0.1  
PQITLWQRPIVTIKVEGQLKEAPLDTGADDTVLEDMNLNLPGRWKPKMIGGLGGFIKVRQYDQIHIEICGHKVIGTVLIG  
PTPVNIIGRSMLTQIGCTLNF

>102782\_44 0.1  
PQITLWQRPIVTIKVEGQLKEAPLDTGADDTVLEDVNLPGRWKPKMIGGLGGFIKVRQYDQIHIEICGHKVIGTVLVG  
PTPVNIIGRNMLTQIGCTLNF

>102782\_45 0.1  
PQITLWQRPIVTIKVEGQLKEAPLDTGADDTVLEDVNLPGRWKPKMIGGLGGFIKVRQYDQIHIEICGHKVIGTVLVG  
PTPVNIIGRSMLTQIGCTLNF

>102782\_46 0.1  
PQITLWQRPIVTIKVEGQLKEAPLDTGADDTVLEDVNLPGRWKPKMIGGLGGFIKVRQYDQIHIEICGHKVIGTVLIG  
PTPVNIIGRNMLTQIGCTLNF

>102782\_47 0.1  
PQITLWQRPIVTIKVEGQLKEAPLDTGADDTVLEDVNLPGRWKPKMIGGLGGFIKVRQYDQIHIEICGHKVIGTVLIG  
PTPVNIIGRSMLTQIGCTLNF

>102782.52 0.1  
PQITLWQRPIVTIKVEGQLKEAPLDTGADDTVFEDMNLPGRWKPKMIGGLGGFIKVRQYDQIHIEICGHKVIGTVLVG  
PTPVNIIGRNMLTQIGCTLNF

>102782.53 0.1  
PQITLWQRPIVTIKVEGQLKEAPLDTGADDTVFEDMNLPGRWKPKMIGGLGGFIKVRQYDQIHIEICGHKVIGTVLVG  
PTPVNIIGRSMLTQIGCTLNF

>102782.54 0.1  
PQITLWQRPIVTIKVEGQLKEAPLDTGADDTVFEDMNLPGRWKPKMIGGLGGFIKVRQYDQIHIEICGHKVIGTVLIG  
PTPVNIIGRNMLTQIGCTLNF

>102782.55 0.1  
PQITLWQRPIVTIKVEGQLKEAPLDTGADDTVFEDMNLPGRWKPKMIGGLGGFIKVRQYDQIHIEICGHKVIGTVLIG  
PTPVNIIGRSMLTQIGCTLNF

>102782.60 0.1  
PQITLWQRPIVTIKVEGQLKEAPLDTGADDTVFEDVNLPGRWKPKMIGGLGGFIKVRQYDQIHIEICGHKVIGTVLVG  
PTPVNIIGRNMLTQIGCTLNF

>102782.61 0.1  
PQITLWQRPIVTIKVEGQLKEAPLDTGADDTVFEDVNLPGRWKPKMIGGLGGFIKVRQYDQIHIEICGHKVIGTVLVG  
PTPVNIIGRSMLTQIGCTLNF

>102782.62 0.1  
PQITLWQRPIVTIKVEGQLKEAPLDTGADDTVFEDVNLPGRWKPKMIGGLGGFIKVRQYDQIHIEICGHKVIGTVLIG  
PTPVNIIGRNMLTQIGCTLNF

>102782.63 0.1  
PQITLWQRPIVTIKVEGQLKEAPLDTGADDTVFEDVNLPGRWKPKMIGGLGGFIKVRQYDQIHIEICGHKVIGTVLIG  
PTPVNIIGRSMLTQIGCTLNF

>102782.164 0.1  
PQITLWQRPIVTIKVEGQLTEAPLDTGADDTVLEDMNLPGRWKPKMIGGLGGFIKVRQYDQIHIEICGHKVIGTVLVG  
PTPVNIIGRNMLTQIGCTLNF

>102782.64 0.1  
PQITLWQRPIVTIKVEGQLIEALLDTGADDTVLEDMNLPGRWKPKMIGGLGGFIKVRQYDQIHIEICGHKAIGTVLVG  
PTPVNIIGRNMLTQIGCTLNF

>102782.65 0.1  
PQITLWQRPIVTIKVEGQLIEALLDTGADDTVLEDMNLPGRWKPKMIGGLGGFIKVRQYDQIHIEICGHKAIGTVLVG  
PTPVNIIGRSMLTQIGCTLNF

>102782.66 0.1  
PQITLWQRPIVTIKVEGQLIEALLDTGADDTVLEDMNLPGRWKPKMIGGLGGFIKVRQYDQIHIEICGHKAIGTVLIG  
PTPVNIIGRNMLTQIGCTLNF

>102782.67 0.1  
PQITLWQRPIVTIKVEGQLIEALLDTGADDTVLEDMNLPGRWKPKMIGGLGGFIKVRQYDQIHIEICGHKAIGTVLIG  
PTPVNIIGRSMLTQIGCTLNF

>102782.72 0.1  
PQITLWQRPIVTIKVEGQLIEALLDTGADDTVLEDVNLPGRWKPKMIGGLGGFIKVRQYDQIHIEICGHKAIGTVLVG  
PTPVNIIGRNMLTQIGCTLNF

>102782.73 0.1  
PQITLWQRPIVTIKVEGQLIEALLDTGADDTVLEDVNLPGRWKPKMIGGLGGFIKVRQYDQIHIEICGHKAIGTVLVG  
PTPVNIIGRSMLTQIGCTLNF

>102782.74 0.1  
PQITLWQRPIVTIKVEGQLIEALLDTGADDTVLEDVNLPGRWKPKMIGGLGGFIKVRQYDQIHIEICGHKAIGTVLIG  
PTPVNIIGRNMLTQIGCTLNF

>102782.75 0.1  
PQITLWQRPIVTIKVEGQLIEALLDTGADDTVLEDVNLPGRWKPKMIGGLGGFIKVRQYDQIHIEICGHKAIGTVLIG  
PTPVNIIGRSMLTQIGCTLNF

>102782.80 0.1  
PQITLWQRPIVTIKVEGQLIEALLDTGADDTVFEDMNLPGRWKPKMIGGLGGFIKVRQYDQIHIEICGHKAIGTVLVG  
PTPVNIIGRNMLTQIGCTLNF

>102782.81 0.1  
PQITLWQRPIVTIKVEGQLIEALLDTGADDTVFEDMNLPGRWKPKMIGGLGGFIKVRQYDQIHIEICGHKAIGTVLVG  
PTPVNIIGRSMLTQIGCTLNF

>102782.82 0.1  
PQITLWQRPIVTIKVEGQLIEALLDTGADDTVFEDMNLPGRWKPKMIGGLGGFIKVRQYDQIHIEICGHKAIGTVLIG  
PTPVNIIGRNMLTQIGCTLNF

>102782.83 0.1  
PQITLWQRPIVTIKVEGQLIEALLDTGADDTVFEDMNLPGRWKPKMIGGLGGFIKVRQYDQIHIEICGHKAIGTVLIG  
PTPVNIIGRSMLTQIGCTLNF

>102782\_88 0.1  
PQITLWQRPIVTIKVEGQLIEALLDTGADDTVFEDVNLPRGWKPKMIGGLGGFIKVRQYDQIHIEICGHKAIGTVLVG  
PTPVNIIGRNMLTQIGCTLNF

>102782\_89 0.1  
PQITLWQRPIVTIKVEGQLIEALLDTGADDTVFEDVNLPRGWKPKMIGGLGGFIKVRQYDQIHIEICGHKAIGTVLVG  
PTPVNIIGRSMLTQIGCTLNF

>102782\_90 0.1  
PQITLWQRPIVTIKVEGQLIEALLDTGADDTVFEDVNLPRGWKPKMIGGLGGFIKVRQYDQIHIEICGHKAIGTVLIG  
PTPVNIIGRNMLTQIGCTLNF

>102782\_91 0.1  
PQITLWQRPIVTIKVEGQLIEALLDTGADDTVFEDVNLPRGWKPKMIGGLGGFIKVRQYDQIHIEICGHKAIGTVLIG  
PTPVNIIGRSMLTQIGCTLNF

>102782\_68 0.1  
PQITLWQRPIVTIKVEGQLIEALLDTGADDTVLEDMNLPGRWKPKMIGGLGGFIKVRQYDQIHIEICGHKVIGTVLVG  
PTPVNIIGRNMLTQIGCTLNF

>102782\_69 0.1  
PQITLWQRPIVTIKVEGQLIEALLDTGADDTVLEDMNLPGRWKPKMIGGLGGFIKVRQYDQIHIEICGHKVIGTVLVG  
PTPVNIIGRSMLTQIGCTLNF

>102782\_70 0.1  
PQITLWQRPIVTIKVEGQLIEALLDTGADDTVLEDMNLPGRWKPKMIGGLGGFIKVRQYDQIHIEICGHKVIGTVLIG  
PTPVNIIGRNMLTQIGCTLNF

>102782\_71 0.1  
PQITLWQRPIVTIKVEGQLIEALLDTGADDTVLEDMNLPGRWKPKMIGGLGGFIKVRQYDQIHIEICGHKVIGTVLIG  
PTPVNIIGRSMLTQIGCTLNF

>102782\_76 0.1  
PQITLWQRPIVTIKVEGQLIEALLDTGADDTVLEDVNLPRGWKPKMIGGLGGFIKVRQYDQIHIEICGHKVIGTVLVG  
PTPVNIIGRNMLTQIGCTLNF

>102782\_77 0.1  
PQITLWQRPIVTIKVEGQLIEALLDTGADDTVLEDVNLPRGWKPKMIGGLGGFIKVRQYDQIHIEICGHKVIGTVLVG  
PTPVNIIGRSMLTQIGCTLNF

>102782\_78 0.1  
PQITLWQRPIVTIKVEGQLIEALLDTGADDTVLEDVNLPRGWKPKMIGGLGGFIKVRQYDQIHIEICGHKVIGTVLIG  
PTPVNIIGRNMLTQIGCTLNF

>102782\_79 0.1  
PQITLWQRPIVTIKVEGQLIEALLDTGADDTVLEDVNLPRGWKPKMIGGLGGFIKVRQYDQIHIEICGHKVIGTVLIG  
PTPVNIIGRSMLTQIGCTLNF

>102782\_84 0.1  
PQITLWQRPIVTIKVEGQLIEALLDTGADDTVFEDMNLPGRWKPKMIGGLGGFIKVRQYDQIHIEICGHKVIGTVLVG  
PTPVNIIGRNMLTQIGCTLNF

>102782\_85 0.1  
PQITLWQRPIVTIKVEGQLIEALLDTGADDTVFEDMNLPGRWKPKMIGGLGGFIKVRQYDQIHIEICGHKVIGTVLVG  
PTPVNIIGRSMLTQIGCTLNF

>102782\_86 0.1  
PQITLWQRPIVTIKVEGQLIEALLDTGADDTVFEDMNLPGRWKPKMIGGLGGFIKVRQYDQIHIEICGHKVIGTVLIG  
PTPVNIIGRNMLTQIGCTLNF

>102782\_87 0.1  
PQITLWQRPIVTIKVEGQLIEALLDTGADDTVFEDMNLPGRWKPKMIGGLGGFIKVRQYDQIHIEICGHKVIGTVLIG  
PTPVNIIGRSMLTQIGCTLNF

>102782\_92 0.1  
PQITLWQRPIVTIKVEGQLIEALLDTGADDTVFEDVNLPRGWKPKMIGGLGGFIKVRQYDQIHIEICGHKVIGTVLVG  
PTPVNIIGRNMLTQIGCTLNF

>102782\_93 0.1  
PQITLWQRPIVTIKVEGQLIEALLDTGADDTVFEDVNLPRGWKPKMIGGLGGFIKVRQYDQIHIEICGHKVIGTVLVG  
PTPVNIIGRSMLTQIGCTLNF

>102782\_94 0.1  
PQITLWQRPIVTIKVEGQLIEALLDTGADDTVFEDVNLPRGWKPKMIGGLGGFIKVRQYDQIHIEICGHKVIGTVLIG  
PTPVNIIGRNMLTQIGCTLNF

>102782\_95 0.1  
PQITLWQRPIVTIKVEGQLIEALLDTGADDTVFEDVNLPRGWKPKMIGGLGGFIKVRQYDQIHIEICGHKVIGTVLIG  
PTPVNIIGRSMLTQIGCTLNF

>102782\_4 0.1  
PQITLWQRPIVTIKVEGQLKEALLDTGADDTVLEDMNLPGRWKPKMIGGLGGFIKVRQYDQIHIEICGHKVIGTVLVG  
PTPVNIIGRNMLTQIGCTLNF

>102782\_5 0.1  
PQITLWQRPIVTIKVEGQLKEALLDTGADDTVLED MNLPGRWKPKMIGGLGGFIKVRQYDQIHIEICGHKVIGTVLVG  
PTPVNIIGRSMLTQIGCTLNF

>102782\_6 0.1  
PQITLWQRPIVTIKVEGQLKEALLDTGADDTVLED MNLPGRWKPKMIGGLGGFIKVRQYDQIHIEICGHKVIGTVLIG  
PTPVNIIGRNMLTQIGCTLNF

>102782\_7 0.1  
PQITLWQRPIVTIKVEGQLKEALLDTGADDTVLED MNLPGRWKPKMIGGLGGFIKVRQYDQIHIEICGHKVIGTVLIG  
PTPVNIIGRSMLTQIGCTLNF

>102782\_12 0.1  
PQITLWQRPIVTIKVEGQLKEALLDTGADDTVLEDVNL PGRWKPKMIGGLGGFIKVRQYDQIHIEICGHKVIGTVLVG  
PTPVNIIGRNMLTQIGCTLNF

>102782\_13 0.1  
PQITLWQRPIVTIKVEGQLKEALLDTGADDTVLEDVNL PGRWKPKMIGGLGGFIKVRQYDQIHIEICGHKVIGTVLVG  
PTPVNIIGRSMLTQIGCTLNF

>102782\_14 0.1  
PQITLWQRPIVTIKVEGQLKEALLDTGADDTVLEDVNL PGRWKPKMIGGLGGFIKVRQYDQIHIEICGHKVIGTVLIG  
PTPVNIIGRNMLTQIGCTLNF

>102782\_15 0.1  
PQITLWQRPIVTIKVEGQLKEALLDTGADDTVLEDVNL PGRWKPKMIGGLGGFIKVRQYDQIHIEICGHKVIGTVLIG  
PTPVNIIGRSMLTQIGCTLNF

>102782\_20 0.1  
PQITLWQRPIVTIKVEGQLKEALLDTGADDTVLED MNLPGRWKPKMIGGLGGFIKVRQYDQIHIEICGHKVIGTVLVG  
PTPVNIIGRNMLTQIGCTLNF

>102782\_21 0.1  
PQITLWQRPIVTIKVEGQLKEALLDTGADDTVLED MNLPGRWKPKMIGGLGGFIKVRQYDQIHIEICGHKVIGTVLVG  
PTPVNIIGRSMLTQIGCTLNF

>102782\_22 0.1  
PQITLWQRPIVTIKVEGQLKEALLDTGADDTVLED MNLPGRWKPKMIGGLGGFIKVRQYDQIHIEICGHKVIGTVLIG  
PTPVNIIGRNMLTQIGCTLNF

>102782\_23 0.1  
PQITLWQRPIVTIKVEGQLKEALLDTGADDTVLED MNLPGRWKPKMIGGLGGFIKVRQYDQIHIEICGHKVIGTVLIG  
PTPVNIIGRSMLTQIGCTLNF

>102782\_30 0.1  
PQITLWQRPIVTIKVEGQLKEALLDTGADDTVLEDVNL PGRWKPKMIGGLGGFIKVRQYDQIHIEICGHKVIGTVLIG  
PTPVNIIGRNMLTQIGCTLNF

>102782\_31 0.1  
PQITLWQRPIVTIKVEGQLKEALLDTGADDTVLEDVNL PGRWKPKMIGGLGGFIKVRQYDQIHIEICGHKVIGTVLIG  
PTPVNIIGRSMLTQIGCTLNF

>102782\_132 0.1  
PQITLWQRPIVTIKVEGQLTEALLDTGADDTVLED MNLPGRWKPKMIGGLGGFIKVRQYDQIHIEICGHKVIGTVLVG  
PTPVNIIGRNMLTQIGCTLNF

>102782\_133 0.1  
PQITLWQRPIVTIKVEGQLTEALLDTGADDTVLED MNLPGRWKPKMIGGLGGFIKVRQYDQIHIEICGHKVIGTVLVG  
PTPVNIIGRSMLTQIGCTLNF

>102782\_134 0.1  
PQITLWQRPIVTIKVEGQLTEALLDTGADDTVLED MNLPGRWKPKMIGGLGGFIKVRQYDQIHIEICGHKVIGTVLIG  
PTPVNIIGRNMLTQIGCTLNF

>102782\_135 0.1  
PQITLWQRPIVTIKVEGQLTEALLDTGADDTVLED MNLPGRWKPKMIGGLGGFIKVRQYDQIHIEICGHKVIGTVLIG  
PTPVNIIGRSMLTQIGCTLNF

>102782\_140 0.1  
PQITLWQRPIVTIKVEGQLTEALLDTGADDTVLEDVNL PGRWKPKMIGGLGGFIKVRQYDQIHIEICGHKVIGTVLVG  
PTPVNIIGRNMLTQIGCTLNF

>102782\_141 0.1  
PQITLWQRPIVTIKVEGQLTEALLDTGADDTVLEDVNL PGRWKPKMIGGLGGFIKVRQYDQIHIEICGHKVIGTVLVG  
PTPVNIIGRSMLTQIGCTLNF

>102782\_142 0.1  
PQITLWQRPIVTIKVEGQLTEALLDTGADDTVLEDVNL PGRWKPKMIGGLGGFIKVRQYDQIHIEICGHKVIGTVLIG  
PTPVNIIGRNMLTQIGCTLNF

>102782\_143 0.1  
PQITLWQRPIVTIKVEGQLTEALLDTGADDTVLEDVNL PGRWKPKMIGGLGGFIKVRQYDQIHIEICGHKVIGTVLIG  
PTPVNIIGRSMLTQIGCTLNF



>102782\_148 0.1  
PQITLWQRPIVTIKVEGQLTEALLDTGADDTVFEDMNLPGRWKPKMIGGLGGFIKVRQYDQIHIEICGHKVIGTVLVG  
PTPVNIIGRNMLTQIGCTLNF

>102782\_149 0.1  
PQITLWQRPIVTIKVEGQLTEALLDTGADDTVFEDMNLPGRWKPKMIGGLGGFIKVRQYDQIHIEICGHKVIGTVLVG  
PTPVNIIGRSMLTQIGCTLNF

>102782\_150 0.1  
PQITLWQRPIVTIKVEGQLTEALLDTGADDTVFEDMNLPGRWKPKMIGGLGGFIKVRQYDQIHIEICGHKVIGTVLIG  
PTPVNIIGRNMLTQIGCTLNF

>102782\_151 0.1  
PQITLWQRPIVTIKVEGQLTEALLDTGADDTVFEDMNLPGRWKPKMIGGLGGFIKVRQYDQIHIEICGHKVIGTVLIG  
PTPVNIIGRSMLTQIGCTLNF

>102782\_2 0.1  
PQITLWQRPIVTIKVEGQLKEALLDTGADDTVLEDMNLPGRWKPKMIGGLGGFIKVRQYDQIHIEICGHKAIGTVLIG  
PTPVNIIGRNMLTQIGCTLNF

>102782\_3 0.1  
PQITLWQRPIVTIKVEGQLKEALLDTGADDTVLEDMNLPGRWKPKMIGGLGGFIKVRQYDQIHIEICGHKAIGTVLIG  
PTPVNIIGRSMLTQIGCTLNF

>102782\_8 0.1  
PQITLWQRPIVTIKVEGQLKEALLDTGADDTVLEDVNLPGRWKPKMIGGLGGFIKVRQYDQIHIEICGHKAIGTVLVG  
PTPVNIIGRNMLTQIGCTLNF

>102782\_10 0.1  
PQITLWQRPIVTIKVEGQLKEALLDTGADDTVLEDVNLPGRWKPKMIGGLGGFIKVRQYDQIHIEICGHKAIGTVLIG  
PTPVNIIGRNMLTQIGCTLNF

>102782\_11 0.1  
PQITLWQRPIVTIKVEGQLKEALLDTGADDTVLEDVNLPGRWKPKMIGGLGGFIKVRQYDQIHIEICGHKAIGTVLIG  
PTPVNIIGRSMLTQIGCTLNF

>102782\_16 0.1  
PQITLWQRPIVTIKVEGQLKEALLDTGADDTVFEDMNLPGRWKPKMIGGLGGFIKVRQYDQIHIEICGHKAIGTVLVG  
PTPVNIIGRNMLTQIGCTLNF

>102782\_17 0.1  
PQITLWQRPIVTIKVEGQLKEALLDTGADDTVFEDMNLPGRWKPKMIGGLGGFIKVRQYDQIHIEICGHKAIGTVLVG  
PTPVNIIGRSMLTQIGCTLNF

>102782\_18 0.1  
PQITLWQRPIVTIKVEGQLKEALLDTGADDTVFEDMNLPGRWKPKMIGGLGGFIKVRQYDQIHIEICGHKAIGTVLIG  
PTPVNIIGRNMLTQIGCTLNF

>102782\_19 0.1  
PQITLWQRPIVTIKVEGQLKEALLDTGADDTVFEDMNLPGRWKPKMIGGLGGFIKVRQYDQIHIEICGHKAIGTVLIG  
PTPVNIIGRSMLTQIGCTLNF

>102782\_24 0.1  
PQITLWQRPIVTIKVEGQLKEALLDTGADDTVFEDVNLPGRWKPKMIGGLGGFIKVRQYDQIHIEICGHKAIGTVLVG  
PTPVNIIGRNMLTQIGCTLNF

>102782\_25 0.1  
PQITLWQRPIVTIKVEGQLKEALLDTGADDTVFEDVNLPGRWKPKMIGGLGGFIKVRQYDQIHIEICGHKAIGTVLVG  
PTPVNIIGRSMLTQIGCTLNF

>102782\_26 0.1  
PQITLWQRPIVTIKVEGQLKEALLDTGADDTVFEDVNLPGRWKPKMIGGLGGFIKVRQYDQIHIEICGHKAIGTVLIG  
PTPVNIIGRNMLTQIGCTLNF

>13255\_0 0.1  
PQITLWQRPLVTIKIGGQLKEALLDTGADDTVLEEMNLPGRWKPKMIGGIGGFIVGQYDQILIEICGHKAIGTVLVG  
PTPVNIIGRSLLTQIGCTLNF

**Sequences for the IDV-resistant ensemble**

>144045\_0 500.0  
PQITLWQRPFIPVKVGGQPIEALLDTGADDTVLEGINLPGRWKPKIIGGIGGFVKVRQYDQIPIEICGHKVLSTVLV  
PTPVNVIGRNLMTQLGCTLNF

>102993\_0 500.0  
PQIALWQRPIVTVKVGGLIEALLDTGADDTVLEDINLPGRWKPKIIGGIGGFVKVKEYENVPIEICGHKATCSVLV  
PTPFNIIGRNLMTKIGCTLNF

>102993\_1 500.0  
PQIALWQRPIVTVKVGGLIEALLDTGADDTVLENINLPGRWKPKIIGGIGGFVKVKEYENVPIEICGHKATCSVLV  
PTPFNIIGRNLMTKIGCTLNF

>116523\_0 500.0

PQITLWQRPVVTIKIGGQLKEALLDTGADDTVLEEMDLPGRWPKPKMILGIGGFSKVRQYDQVPIEICGYKVIGSVLIG  
PTPANIIGRNLLTQLGCTLNF  
>116523\_1 500.0  
PQITLWQRPVVTIKIGGQLKEALLDTGADDTVLEEMDLPGRWPKPKMILGIGGYSKVRQYDQVPIEICGYKVIGSVLIG  
PTPANIIGRNLLTQLGCTLNF  
>116523\_2 500.0  
PQITLWQRPVVTIKIGGQLKEALLDTGADDTVLEEMDLPGRWPKPKMIVGIGGFSKVRQYDQVPIEICGYKVIGSVLIG  
PTPANIIGRNLLTQLGCTLNF  
>116523\_3 500.0  
PQITLWQRPVVTIKIGGQLKEALLDTGADDTVLEEMDLPGRWPKPKMIVGIGGYSKVRQYDQVPIEICGYKVIGSVLIG  
PTPANIIGRNLLTQLGCTLNF  
>116523\_4 500.0  
PQITLWQRPVVTIKIGGQLKEALLDTGADDTVLEEMDLPGRWPKPKIILGIGGFSKVRQYDQVPIEICGYKVIGSVLIG  
PTPANIIGRNLLTQLGCTLNF  
>116523\_5 500.0  
PQITLWQRPVVTIKIGGQLKEALLDTGADDTVLEEMDLPGRWPKPKIILGIGGYSKVRQYDQVPIEICGYKVIGSVLIG  
PTPANIIGRNLLTQLGCTLNF  
>116523\_6 500.0  
PQITLWQRPVVTIKIGGQLKEALLDTGADDTVLEEMDLPGRWPKPKIIVGIGGFSKVRQYDQVPIEICGYKVIGSVLIG  
PTPANIIGRNLLTQLGCTLNF  
>116523\_7 500.0  
PQITLWQRPVVTIKIGGQLKEALLDTGADDTVLEEMDLPGRWPKPKIIVGIGGYSKVRQYDQVPIEICGYKVIGSVLIG  
PTPANIIGRNLLTQLGCTLNF  
>116523\_8 500.0  
PQITLWQRPVVTIKIGGQLKEALLDTGADDTVLEEMDLPGRWTPKMILGIGGFSKVRQYDQVPIEICGYKVIGSVLIG  
PTPANIIGRNLLTQLGCTLNF  
>116523\_9 500.0  
PQITLWQRPVVTIKIGGQLKEALLDTGADDTVLEEMDLPGRWTPKMILGIGGYSKVRQYDQVPIEICGYKVIGSVLIG  
PTPANIIGRNLLTQLGCTLNF  
>116523\_10 500.0  
PQITLWQRPVVTIKIGGQLKEALLDTGADDTVLEEMDLPGRWTPKMIVGIGGFSKVRQYDQVPIEICGYKVIGSVLIG  
PTPANIIGRNLLTQLGCTLNF  
>116523\_11 500.0  
PQITLWQRPVVTIKIGGQLKEALLDTGADDTVLEEMDLPGRWTPKMIVGIGGYSKVRQYDQVPIEICGYKVIGSVLIG  
PTPANIIGRNLLTQLGCTLNF  
>116523\_12 500.0  
PQITLWQRPVVTIKIGGQLKEALLDTGADDTVLEEMDLPGRWTPKIILGIGGFSKVRQYDQVPIEICGYKVIGSVLIG  
PTPANIIGRNLLTQLGCTLNF  
>116523\_13 500.0  
PQITLWQRPVVTIKIGGQLKEALLDTGADDTVLEEMDLPGRWTPKIILGIGGYSKVRQYDQVPIEICGYKVIGSVLIG  
PTPANIIGRNLLTQLGCTLNF  
>116523\_14 500.0  
PQITLWQRPVVTIKIGGQLKEALLDTGADDTVLEEMDLPGRWTPKIIVGIGGFSKVRQYDQVPIEICGYKVIGSVLIG  
PTPANIIGRNLLTQLGCTLNF  
>116523\_15 500.0  
PQITLWQRPVVTIKIGGQLKEALLDTGADDTVLEEMDLPGRWTPKIIVGIGGYSKVRQYDQVPIEICGYKVIGSVLIG  
PTPANIIGRNLLTQLGCTLNF  
>81917\_0 500.0  
PQITLWQRPVVTIKIGGQLKEALLDTGADDTVLEEMNLPGRWTPKMIVGIGGFTKVRQYDQILVEICGHKVIGSVLIG  
PTPANIIGRNLLTQIGCTLNF  
>81917\_1 500.0  
PQITLWQRPVVTIKIGGQLKEALLDTGADDTVLEEMNLPGRWTPKMIVGIGGFTKVRQYDQVLEICGHKVIGSVLIG  
PTPANIIGRNLLTQIGCTLNF  
>54177\_0 400.0  
PQITLWQRPVVTIKIGGQLIEALLDTGADDTVLEEINLPGRWPKPKIIGGIGGFIKVRQYDQILIEICGHKVISTVVVG  
PTPVNAIGRNLLTQIGCTLNF  
>103057\_1 500.0  
PQITLWQRPVVTIKIGGQLREALLDTGADDTVLEELPGRWTPKIIGGIGGFVKVKQYEEVPIEICEHKTTTTVLVG  
PTPFNIIGRNLMTQLGCTLNF  
>103057\_3 500.0  
PQITLWQRPVVTIKIGGQLREALLDTGADDTVLEELPGRWTPKIIGGIGGFVKVKQYEEVPVEICEHKTTTTVLVG  
PTPFNIIGRNLMTQLGCTLNF  
>78924\_3 500.0

PQITLWQRPVVTIKIGGQIKEALLDTGADDTVLEEMNLPGRWPKLIVGIGGYAKVREYEEVPIEICGHKVVGSVLIG  
PTPTNIIGRNLMTQLGCTLNF  
>78924\_7 500.0  
PQITLWQRPVVKIKIGGQIKEALLDTGADDTVLEEMNLPGRWPKLIVGIGGYAKVREYEEVPIEICGHKVVGSVLIG  
PTPTNIIGRNLMTQLGCTLNF  
>81911\_4 500.0  
PQITLWQRPIVPVKIGGQQIEALLDTGADDTVLEDINLPGRWPKIIGGIGGFVKVRQYDQVPVEICGHKVVGTVVVG  
PTPFNIIGRNLMTQIGCTLNF  
>81911\_5 500.0  
PQITLWQRPIVPVKIGGQQIEALLDTGADDTVLEDINLPGRWPKIIGGIGGFVKVKQYDQVPVEICGHKVVGTVVVG  
PTPFNIIGRNLMTQIGCTLNF  
>81911\_6 500.0  
PQITLWQRPIVPVKVGGQQIEALLDTGADDTVLEDINLPGRWPKIIGGIGGFVKVRQYDQVPVEICGHKVVGTVVVG  
PTPFNIIGRNLMTQIGCTLNF  
>81911\_7 500.0  
PQITLWQRPIVPVKVGGQQIEALLDTGADDTVLEDINLPGRWPKIIGGIGGFVKVKQYDQVPVEICGHKVVGTVVVG  
PTPFNIIGRNLMTQIGCTLNF  
>61115\_0 400.0  
PQITLWQRPIITVKIGGQTREVLDDTADDTVIEDIDLPGRWKPKLIGGIGGFVKVREYNQVPIEICGHKVLSTVLVG  
PTPVNVIGRNLMTQIGCTLNF  
>61115\_1 400.0  
PQITLWQRPIITVKIGGQTREVLDDTADDTVIEDIDLPGRWKPKLIGGIGGFVKVREYNQVPIEICGHKVVSTVLVG  
PTPVNVIGRNLMTQIGCTLNF  
>61115\_2 400.0  
PQITLWQRPIITVKIGGQTREVLDDTADDTVIEDIDLPGRWKPKLIGGIGGFVKVREYNQVPIEICGRKVLSTVLVG  
PTPVNVIGRNLMTQIGCTLNF  
>61115\_3 400.0  
PQITLWQRPIITVKIGGQTREVLDDTADDTVIEDIDLPGRWKPKLIGGIGGFVKVREYNQVPIEICGRKVVSTVLVG  
PTPVNVIGRNLMTQIGCTLNF  
>78924\_2 500.0  
PQITLWQRPVVTIKIGGQIKEALLDTGADDTVLEEMNLPGRWPKLIVGIGGYAKVREYEEVPIEICGHKVVGSVLIG  
PTPANIIGRNLMTQLGCTLNF  
>78924\_6 500.0  
PQITLWQRPVVKIKIGGQIKEALLDTGADDTVLEEMNLPGRWPKLIVGIGGYAKVREYEEVPIEICGHKVVGSVLIG  
PTPANIIGRNLMTQLGCTLNF  
>117023\_0 500.0  
PQITLWQRPIVTIKIGGQLREALDGTADDTVLEDIELPGRWPKMIVGVGGFAKVRQYDQVPIEICGHKVVGTVLVG  
PTPANIIGRNLMTQLGCTLNF  
>117023\_1 500.0  
PQITLWQRPIVTIKIGGQLREALDGTADDTVLEDIELPGRWPKMIVGVGGFAKVKQYDQVPIEICGHKVVGTVLVG  
PTPANIIGRNLMTQLGCTLNF  
>86640\_0 500.0  
PQITLWQRPFVMTKIGGQLIEALLDTGADDTVLEEIDLPGRWKPKIIGGIGGFVKVRQYDQVPIEIFGHKTTTTVLVG  
PTPVNVIGRNLMTQLGCTLNF  
>86640\_1 500.0  
PQITLWQRPFVMTKIGGQLIEALLDTGADDTVLEEIDLPGRWKPKIIGGIGGFVKVRQYDQVPIEVFGHKTTTTVLVG  
PTPVNVIGRNLMTQLGCTLNF  
>86890\_0 500.0  
PQITLWQRPIVTIKVGGQLKEALLDTGADDTVFEQLDLPGRWPKLIVGIGGFTKVRQYDQVPIEICGHKVVGDILVG  
PTPANIIGRNLMTQLGCTLNF  
>86890\_1 500.0  
PQITLWQRPIVTIKVGGQLKEALLDTGADDTVFEQLDLPGRWPKLIVGIGGFTKVRQYDQVPIEICGHKVVGDILVG  
PTPANIIGRNLMTQLGCTLNF  
>86890\_2 500.0  
PQITLWQRPIVTVKVGGLKEALLDTGADDTVFEQLDLPGRWPKLIVGIGGFTKVRQYDQVPIEICGHKVVGDILVG  
PTPANIIGRNLMTQLGCTLNF  
>86890\_3 500.0  
PQITLWQRPIVTVKVGGLKEALLDTGADDTVFEQLDLPGRWPKLIVGIGGFTKVRQYDQVPIEICGHKVVGDILVG  
PTPANIIGRNLMTQLGCTLNF  
>86890\_4 500.0  
PQITLWQRPVVTIKVGGQLKEALLDTGADDTVFEQLDLPGRWPKLIVGIGGFTKVRQYDQVPIEICGHKVVGDILVG  
PTPANIIGRNLMTQLGCTLNF  
>86890\_5 500.0

PQITLWQRPVVTIKVGGQLKEALLDTGADDTVFQELDLP GKWKPKLIVGIGGFTKVRQYDQVPIEICGHKVVGDILVG  
PTPANIIGRNLM TQLGCTLNF  
>86890\_6 500.0  
PQITLWQRPVVTVKVGGLKEALLDTGADDTVFQELDLPGRWKPKLIVGIGGFTKVRQYDQVPIEICGHKVVGDILVG  
PTPANIIGRNLM TQLGCTLNF  
>86890\_7 500.0  
PQITLWQRPVVTVKVGGLKEALLDTGADDTVFQELDLP GKWKPKLIVGIGGFTKVRQYDQVPIEICGHKVVGDILVG  
PTPANIIGRNLM TQLGCTLNF  
>117033\_1 500.0  
PQITLWQRPIVTIKIGGQIREALLDTGADDTVLEDINLPGRWKPKLIVGIGGFSKVKEYDQVPIEICGHKVVGTVLVG  
PTPANIIGRNLL TQLGCTLNF  
>117033\_2 500.0  
PQITLWQRPIVTIKIGGQIREALLDTGADDTVLEDINLPGRWKPKLIVGIGGFTKVKEYDQVPIEICGHKVVGTVLVG  
PTPANIIGRNLL TQLGCTLNF  
>117033\_4 500.0  
PQITLWQRPIVTIKIGGQIREALLDTGADDTVLEDINLPGRWEPKLIVGIGGFSKVKEYDQVPIEICGHKVVGTVLVG  
PTPANIIGRNLL TQLGCTLNF  
>117033\_5 500.0  
PQITLWQRPIVTIKIGGQIREALLDTGADDTVLEDINLPGRWEPKLIVGIGGFTKVKEYDQVPIEICGHKVVGTVLVG  
PTPANIIGRNLL TQLGCTLNF  
>147553\_0 500.0  
PQITLWQRPIVTIKIGGQLREALLD T GADDTVFTDIDL PGRWTPKIIVGVGGFSKVQYDQVPIEICGHKVVGTVLIG  
PTPANIVGRNLL TQLGCTLNF  
>103057\_0 500.0  
PQITLWQRPIVTVKIGGQLREALLD T GADDTVFEDIELPGRWTPKIIGGIGGFVKVKQYEEVPIEICEHKT TATVLVG  
PTPFNIIGRNLM TQLGCTLNF  
>103057\_2 500.0  
PQITLWQRPIVTVKIGGQLREALLD T GADDTVFEDIELPGRWTPKIIGGIGGFVKVKQYEEVPVEICEHKT TATVLVG  
PTPFNIIGRNLM TQLGCTLNF  
>123049\_0 500.0  
PQITLWQRPIITIKIGGQLKDVLM D T GADDTVLEDIDL PGRWKPKLIGGIGGFVKVRQYDHPVEVCGHKV TTTVLVG  
PTPVDVIGRNLL TQIGCTLNF  
>123049\_1 500.0  
PQITLWQRPIITIKIGGQLKDVLM D T GADDTVLEDIDL PGRWKPKLIGGIGGFVKVRQYDNVPVEVCGHKV TTTVLVG  
PTPVDVIGRNLL TQIGCTLNF  
>123049\_2 500.0  
PQITLWQRPIITIKIGGQLKDVLM D T GADDTVLEDIDL PGRWKPKLIGGIGGFVKVKQYDHPVEVCGHKV TTTVLVG  
PTPVDVIGRNLL TQIGCTLNF  
>123049\_3 500.0  
PQITLWQRPIITIKIGGQLKDVLM D T GADDTVLEDIDL PGRWKPKLIGGIGGFVKVKQYDNVPVEVCGHKV TTTVLVG  
PTPVDVIGRNLL TQIGCTLNF  
>123049\_4 500.0  
PQITLWQRPIITIKIGGQLKDVLM D T GADDTVLEDIDL PGRWKPKLIGGIGGFVKVRQYDHPVEVCGHKV TTTVLVG  
PTPVDVIGRNLL TQIGCTLNF  
>123049\_5 500.0  
PQITLWQRPIITIKIGGQLKDVLM D T GADDTVLEDIDL PGRWKPKLIGGIGGFVKVRQYDNVPVEVCGHKV TTTVLVG  
PTPVDVIGRNLL TQIGCTLNF  
>123049\_6 500.0  
PQITLWQRPIITIKIGGQLKDVLM D T GADDTVLEDIDL PGRWKPKLIGGIGGFVKVKQYDHPVEVCGHKV TTTVLVG  
PTPVDVIGRNLL TQIGCTLNF  
>123049\_7 500.0  
PQITLWQRPIITIKIGGQLKDVLM D T GADDTVLEDIDL PGRWKPKLIGGIGGFVKVKQYDNVPVEVCGHKV TTTVLVG  
PTPVDVIGRNLL TQIGCTLNF  
>123049\_8 500.0  
PQITLWQRPIITIKIGGQLKDVLM D T GADDTVLENIDL PGRWKPKLIGGIGGFVKVRQYDHPVEVCGHKV TTTVLVG  
PTPVDVIGRNLL TQIGCTLNF  
>123049\_9 500.0  
PQITLWQRPIITIKIGGQLKDVLM D T GADDTVLENIDL PGRWKPKLIGGIGGFVKVRQYDNVPVEVCGHKV TTTVLVG  
PTPVDVIGRNLL TQIGCTLNF  
>123049\_10 500.0  
PQITLWQRPIITIKIGGQLKDVLM D T GADDTVLENIDL PGRWKPKLIGGIGGFVKVKQYDHPVEVCGHKV TTTVLVG  
PTPVDVIGRNLL TQIGCTLNF  
>123049\_11 500.0

PQITLWQRPIITIKIGGQLKDVLMGTGADDTVLENIDLPGRWKPKLIGGIGGFVKVKQYDNPVEVCGHKVTTTVLVG  
PTPVDVIGRNLLTQIGCTLNF  
>123049\_12 500.0  
PQITLWQRPIITIKIGGQLKDVLMGTGADDTVLENIDLPGKWKPKLIGGIGGFVKVRQYDHPVEVCGHKVTTTVLVG  
PTPVDVIGRNLLTQIGCTLNF  
>123049\_13 500.0  
PQITLWQRPIITIKIGGQLKDVLMGTGADDTVLENIDLPGKWKPKLIGGIGGFVKVRQYDNPVEVCGHKVTTTVLVG  
PTPVDVIGRNLLTQIGCTLNF  
>123049\_14 500.0  
PQITLWQRPIITIKIGGQLKDVLMGTGADDTVLENIDLPGKWKPKLIGGIGGFVKVKQYDHPVEVCGHKVTTTVLVG  
PTPVDVIGRNLLTQIGCTLNF  
>123049\_15 500.0  
PQITLWQRPIITIKIGGQLKDVLMGTGADDTVLENIDLPGKWKPKLIGGIGGFVKVKQYDNPVEVCGHKVTTTVLVG  
PTPVDVIGRNLLTQIGCTLNF  
>98601\_0 400.0  
PQITLWQRPVFTIKIGGQLIEALLDTGADDTVLEEMNLPGRWKPKIIGGIGGFVKVRQYDQPIEICGHKVITTVLIG  
PTPVNAIGRNLLTQIGCTLNF  
>113192\_1 500.0  
PQITLWQRPVFTMKIGGQLIEALLDTGADDTVLEEISLPGRWKPKIIGGIGGFVKVRQYDQVPIEVFGHKATTTVLVG  
PTPVNVIGRNLMTQLGCTLNF  
>113192\_3 500.0  
PQITLWQRPVFTMKIGGQLIEALLDTGADDTVLEEISLPGRWKPKIIGGIGGFVKVRQYDQVPIEVFGQKATTTVLVG  
PTPVNVIGRNLMTQLGCTLNF  
>113192\_5 500.0  
PQITLWQRPVFTMKIGGQLIEALLDTGADDTVLEEISLPGRWKPKIIGGIGGFVKVRQYDQVPVEVFGHKATTTVLVG  
PTPVNVIGRNLMTQLGCTLNF  
>113192\_7 500.0  
PQITLWQRPVFTMKIGGQLIEALLDTGADDTVLEEISLPGRWKPKIIGGIGGFVKVRQYDQVPVEVFGQKATTTVLVG  
PTPVNVIGRNLMTQLGCTLNF  
>113192\_9 500.0  
PQITLWQRPVFTMKIGGQIEALLDTGADDTVLEEISLPGRWKPKIIGGIGGFVKVRQYDQVPIEVFGHKATTTVLVG  
PTPVNVIGRNLMTQLGCTLNF  
>113192\_11 500.0  
PQITLWQRPVFTMKIGGQIEALLDTGADDTVLEEISLPGRWKPKIIGGIGGFVKVRQYDQVPIEVFGQKATTTVLVG  
PTPVNVIGRNLMTQLGCTLNF  
>113192\_13 500.0  
PQITLWQRPVFTMKIGGQIEALLDTGADDTVLEEISLPGRWKPKIIGGIGGFVKVRQYDQVPVEVFGHKATTTVLVG  
PTPVNVIGRNLMTQLGCTLNF  
>113192\_15 500.0  
PQITLWQRPVFTMKIGGQIEALLDTGADDTVLEEISLPGRWKPKIIGGIGGFVKVRQYDQVPVEVFGQKATTTVLVG  
PTPVNVIGRNLMTQLGCTLNF  
>56150\_0 400.0  
PQITLWRRPVVTIKVGGQLTEALLDTGADDTVLEDINLPGRWTPKMIMIGGGLVKVRQYDQVPIEFCGHKVLSTVLVG  
PTPANIIGRNLMTQIGCTLNF  
>56150\_1 400.0  
PQITLWRRPVVTIKVGGQLTEALLDTGADDTVLEDINLPGRWTPKMIMIGGGLVKVRQYDQVPIEFCGRKVLSTVLVG  
PTPANIIGRNLMTQIGCTLNF  
>56150\_2 400.0  
PQITLWRRPVVTIKVGGQLTEALLDTGADDTVLEDINLPGRWTPKMIMIGGGLVKVKQYDQVPIEFCGHKVLSTVLVG  
PTPANIIGRNLMTQIGCTLNF  
>73552\_0 400.0  
PQITLWQRPVITIKIGGQLREALLDTGADDTILEDLDLPGRWKPKIVGGIGGFVKVRQYDQIPMEIEGHKVVGTVLVG  
PTPTNIIGRNVMTQLGCTLNF  
>73552\_3 400.0  
PQITLWQRPVITIKIGGQLREALLDTGADDTILEDLDLPGRWKPKIVGGIGGFVKVKQYDQIPMEIEGHKVVGTVLVG  
PTPTNIVGRNVMTQLGCTLNF  
>81911\_0 500.0  
PQITLWQRPVITVKIGGQIEALLDTGADDTVLEDINLPGRWKPKIIGGIGGFVKVRQYDQVPVEICGHKVVGTVVVG  
PTPFNIIIGRNLMTQIGCTLNF  
>81911\_1 500.0  
PQITLWQRPVITVKIGGQIEALLDTGADDTVLEDINLPGRWKPKIIGGIGGFVKVKQYDQVPVEICGHKVVGTVVVG  
PTPFNIIIGRNLMTQIGCTLNF  
>81911\_2 500.0

PQITLWQRPIVTVKVGQIEALLDTGADDTVLEDINLPGRWPKIIGGIGGFVKVRQYDQVPVEICGHKVVGTVVVG  
 PTPFNIIGRNLMQTIGCTLNF  
 >81911\_3 500.0  
 PQITLWQRPIVTVKVGQIEALLDTGADDTVLEDINLPGRWPKIIGGIGGFVKVQYDQVPVEICGHKVVGTVVVG  
 PTPFNIIGRNLMQTIGCTLNF  
 >115081\_0 500.0  
 PQITLWQRPIVTIKIGGQLREALLDTGADDTVLEDIDLPGRWKPKLIVGIGGFVKVRQYEQVPIEICGHKVVGTVLIG  
 PTPSNIIGRNLMTQLGCTLNF  
 >117033\_0 500.0  
 PQITLWQRPIVTIKIGGQIREALLDTGADDTVLEDINLPGRWPKLIVGIGGFCKVKEYDQVPIEICGHKVVGTVLVG  
 PTPANIIGRNLLTQLGCTLNF  
 >117033\_3 500.0  
 PQITLWQRPIVTIKIGGQIREALLDTGADDTVLEDINLPGRWEPKLVIGIGGFCKVKEYDQVPIEICGHKVVGTVLVG  
 PTPANIIGRNLLTQLGCTLNF  
 >113192\_0 500.0  
 PQITLWQRPFVTMKIGGQLIEALLDTGADDTVLEEISLPGRWPKIIGGIGGFVKVRQYDQVPIEVFGHKAITTVLVG  
 PTPVNVIGRNLMTQLGCTLNF  
 >113192\_2 500.0  
 PQITLWQRPFVTMKIGGQLIEALLDTGADDTVLEEISLPGRWPKIIGGIGGFVKVRQYDQVPIEVFGQKAITTVLVG  
 PTPVNVIGRNLMTQLGCTLNF  
 >113192\_6 500.0  
 PQITLWQRPFVTMKIGGQLIEALLDTGADDTVLEEISLPGRWPKIIGGIGGFVKVRQYDQVPVEVFGQKAITTVLVG  
 PTPVNVIGRNLMTQLGCTLNF  
 >113192\_8 500.0  
 PQITLWQRPFVTMKIGGQIEALLDTGADDTVLEEISLPGRWPKIIGGIGGFVKVRQYDQVPIEVFGHKAITTVLVG  
 PTPVNVIGRNLMTQLGCTLNF  
 >113192\_10 500.0  
 PQITLWQRPFVTMKIGGQIEALLDTGADDTVLEEISLPGRWPKIIGGIGGFVKVRQYDQVPIEVFGQKAITTVLVG  
 PTPVNVIGRNLMTQLGCTLNF  
 >113192\_12 500.0  
 PQITLWQRPFVTMKIGGQIEALLDTGADDTVLEEISLPGRWPKIIGGIGGFVKVRQYDQVPVEVFGHKAITTVLVG  
 PTPVNVIGRNLMTQLGCTLNF  
 >113192\_14 500.0  
 PQITLWQRPFVTMKIGGQIEALLDTGADDTVLEEISLPGRWPKIIGGIGGFVKVRQYDQVPVEVFGQKAITTVLVG  
 PTPVNVIGRNLMTQLGCTLNF  
 >98603\_0 400.0  
 PQITLWQRPIVTIKIGGQLKEALLDTGADDTVFEEMNLPGRWPKIIGGIGGFVKVRQYDQIPIEICGHKVVIGTVVVVG  
 PTPVNAIGRNLLTQIGCTLNF

**Sequences for the IDV-susceptible ensemble**

>102782\_114 0.3  
 PQITLWQRPIVTIKVEGQLIEAPLDTGADDTVLEDINLPGRWPKMIGGLGGFIKVRQYDQIHIEICGHKAIGTVLIG  
 PTPVNIIGRNMLTQIGCTLNF  
 >102782\_115 0.3  
 PQITLWQRPIVTIKVEGQLIEAPLDTGADDTVLEDINLPGRWPKMIGGLGGFIKVRQYDQIHIEICGHKAIGTVLIG  
 PTPVNIIGRSMLTQIGCTLNF  
 >102782\_120 0.3  
 PQITLWQRPIVTIKVEGQLIEAPLDTGADDTVLEDVNLPGRWKPKMIGGLGGFIKVRQYDQIHIEICGHKAIGTVLVG  
 PTPVNIIGRNMLTQIGCTLNF  
 >102782\_121 0.3  
 PQITLWQRPIVTIKVEGQLIEAPLDTGADDTVLEDVNLPGRWKPKMIGGLGGFIKVRQYDQIHIEICGHKAIGTVLVG  
 PTPVNIIGRSMLTQIGCTLNF  
 >102782\_122 0.3  
 PQITLWQRPIVTIKVEGQLIEAPLDTGADDTVLEDVNLPGRWKPKMIGGLGGFIKVRQYDQIHIEICGHKAIGTVLIG  
 PTPVNIIGRNMLTQIGCTLNF  
 >102782\_123 0.3  
 PQITLWQRPIVTIKVEGQLIEAPLDTGADDTVLEDVNLPGRWKPKMIGGLGGFIKVRQYDQIHIEICGHKAIGTVLIG  
 PTPVNIIGRSMLTQIGCTLNF  
 >102782\_100 0.3  
 PQITLWQRPIVTIKVEGQLIEAPLDTGADDTVLEDINLPGRWPKMIGGLGGFIKVRQYDQIHIEICGHKVVIGTVLVG  
 PTPVNIIGRNMLTQIGCTLNF  
 >102782\_101 0.3  
 PQITLWQRPIVTIKVEGQLIEAPLDTGADDTVLEDINLPGRWPKMIGGLGGFIKVRQYDQIHIEICGHKVVIGTVLVG

PTPVNIIGRSMLTQIGCTLNF  
>102782\_102 0.3  
PQITLWQRPIVTIKVEGQLIEAPLDTGADDTVLEDMNLPGRWKPKMIGGLGGFIKVRQYDQIHIEICGHKVIGTVLIG  
PTPVNIIGRNMLTQIGCTLNF  
>102782\_103 0.3  
PQITLWQRPIVTIKVEGQLIEAPLDTGADDTVLEDMNLPGRWKPKMIGGLGGFIKVRQYDQIHIEICGHKVIGTVLIG  
PTPVNIIGRSMLTQIGCTLNF  
>102782\_108 0.3  
PQITLWQRPIVTIKVEGQLIEAPLDTGADDTVLEDVNLPGRWKPKMIGGLGGFIKVRQYDQIHIEICGHKVIGTVLVG  
PTPVNIIGRNMLTQIGCTLNF  
>102782\_109 0.3  
PQITLWQRPIVTIKVEGQLIEAPLDTGADDTVLEDVNLPGRWKPKMIGGLGGFIKVRQYDQIHIEICGHKVIGTVLVG  
PTPVNIIGRSMLTQIGCTLNF  
>102782\_110 0.3  
PQITLWQRPIVTIKVEGQLIEAPLDTGADDTVLEDVNLPGRWKPKMIGGLGGFIKVRQYDQIHIEICGHKVIGTVLIG  
PTPVNIIGRNMLTQIGCTLNF  
>102782\_111 0.3  
PQITLWQRPIVTIKVEGQLIEAPLDTGADDTVLEDVNLPGRWKPKMIGGLGGFIKVRQYDQIHIEICGHKVIGTVLIG  
PTPVNIIGRSMLTQIGCTLNF  
>102782\_116 0.3  
PQITLWQRPIVTIKVEGQLIEAPLDTGADDTVFEDMNLPGRWKPKMIGGLGGFIKVRQYDQIHIEICGHKVIGTVLVG  
PTPVNIIGRNMLTQIGCTLNF  
>102782\_117 0.3  
PQITLWQRPIVTIKVEGQLIEAPLDTGADDTVFEDMNLPGRWKPKMIGGLGGFIKVRQYDQIHIEICGHKVIGTVLVG  
PTPVNIIGRSMLTQIGCTLNF  
>102782\_118 0.3  
PQITLWQRPIVTIKVEGQLIEAPLDTGADDTVFEDMNLPGRWKPKMIGGLGGFIKVRQYDQIHIEICGHKVIGTVLIG  
PTPVNIIGRNMLTQIGCTLNF  
>102782\_119 0.3  
PQITLWQRPIVTIKVEGQLIEAPLDTGADDTVFEDMNLPGRWKPKMIGGLGGFIKVRQYDQIHIEICGHKVIGTVLIG  
PTPVNIIGRSMLTQIGCTLNF  
>102782\_124 0.3  
PQITLWQRPIVTIKVEGQLIEAPLDTGADDTVFEDVNLPGRWKPKMIGGLGGFIKVRQYDQIHIEICGHKVIGTVLVG  
PTPVNIIGRNMLTQIGCTLNF  
>102782\_125 0.3  
PQITLWQRPIVTIKVEGQLIEAPLDTGADDTVFEDVNLPGRWKPKMIGGLGGFIKVRQYDQIHIEICGHKVIGTVLVG  
PTPVNIIGRSMLTQIGCTLNF  
>102782\_126 0.3  
PQITLWQRPIVTIKVEGQLIEAPLDTGADDTVFEDVNLPGRWKPKMIGGLGGFIKVRQYDQIHIEICGHKVIGTVLIG  
PTPVNIIGRNMLTQIGCTLNF  
>102782\_127 0.3  
PQITLWQRPIVTIKVEGQLIEAPLDTGADDTVFEDVNLPGRWKPKMIGGLGGFIKVRQYDQIHIEICGHKVIGTVLIG  
PTPVNIIGRSMLTQIGCTLNF  
>102782\_42 0.3  
PQITLWQRPIVTIKVEGQLKEAPLDTGADDTVLEDVNLPGRWKPKMIGGLGGFIKVRQYDQIHIEICGHKAIGTVLIG  
PTPVNIIGRNMLTQIGCTLNF  
>102782\_43 0.3  
PQITLWQRPIVTIKVEGQLKEAPLDTGADDTVLEDVNLPGRWKPKMIGGLGGFIKVRQYDQIHIEICGHKAIGTVLIG  
PTPVNIIGRSMLTQIGCTLNF  
>102782\_48 0.3  
PQITLWQRPIVTIKVEGQLKEAPLDTGADDTVFEDMNLPGRWKPKMIGGLGGFIKVRQYDQIHIEICGHKAIGTVLVG  
PTPVNIIGRNMLTQIGCTLNF  
>102782\_49 0.3  
PQITLWQRPIVTIKVEGQLKEAPLDTGADDTVFEDMNLPGRWKPKMIGGLGGFIKVRQYDQIHIEICGHKAIGTVLVG  
PTPVNIIGRSMLTQIGCTLNF  
>102782\_50 0.3  
PQITLWQRPIVTIKVEGQLKEAPLDTGADDTVFEDMNLPGRWKPKMIGGLGGFIKVRQYDQIHIEICGHKAIGTVLIG  
PTPVNIIGRNMLTQIGCTLNF  
>102782\_51 0.3  
PQITLWQRPIVTIKVEGQLKEAPLDTGADDTVFEDMNLPGRWKPKMIGGLGGFIKVRQYDQIHIEICGHKAIGTVLIG  
PTPVNIIGRSMLTQIGCTLNF  
>102782\_56 0.3  
PQITLWQRPIVTIKVEGQLKEAPLDTGADDTVFEDVNLPGRWKPKMIGGLGGFIKVRQYDQIHIEICGHKAIGTVLVG

PTPVNIIGRNMLTQIGCTLNF  
>102782\_57 0.3  
PQITLWQRPIVTIKVEGQLKEAPLDTGADDTVFEDVNLPGRWKPKMIGGLGGFIKVRQYDQIHIEICGHKAIGTVLVG  
PTPVNIIGRSMLTQIGCTLNF  
>102782\_58 0.3  
PQITLWQRPIVTIKVEGQLKEAPLDTGADDTVFEDVNLPGRWKPKMIGGLGGFIKVRQYDQIHIEICGHKAIGTVLIG  
PTPVNIIGRNMLTQIGCTLNF  
>102782\_59 0.3  
PQITLWQRPIVTIKVEGQLKEAPLDTGADDTVFEDVNLPGRWKPKMIGGLGGFIKVRQYDQIHIEICGHKAIGTVLIG  
PTPVNIIGRSMLTQIGCTLNF  
>102782\_160 0.3  
PQITLWQRPIVTIKVEGQLTEAPLDTGADDTVLEDMNLPGRWKPKMIGGLGGFIKVRQYDQIHIEICGHKAIGTVLVG  
PTPVNIIGRNMLTQIGCTLNF  
>102782\_161 0.3  
PQITLWQRPIVTIKVEGQLTEAPLDTGADDTVLEDMNLPGRWKPKMIGGLGGFIKVRQYDQIHIEICGHKAIGTVLVG  
PTPVNIIGRSMLTQIGCTLNF  
>102782\_162 0.3  
PQITLWQRPIVTIKVEGQLTEAPLDTGADDTVLEDMNLPGRWKPKMIGGLGGFIKVRQYDQIHIEICGHKAIGTVLIG  
PTPVNIIGRNMLTQIGCTLNF  
>102782\_169 0.3  
PQITLWQRPIVTIKVEGQLTEAPLDTGADDTVLEDVNLPGRWKPKMIGGLGGFIKVRQYDQIHIEICGHKAIGTVLVG  
PTPVNIIGRSMLTQIGCTLNF  
>102782\_171 0.3  
PQITLWQRPIVTIKVEGQLTEAPLDTGADDTVLEDVNLPGRWKPKMIGGLGGFIKVRQYDQIHIEICGHKAIGTVLIG  
PTPVNIIGRSMLTQIGCTLNF  
>102782\_176 0.3  
PQITLWQRPIVTIKVEGQLTEAPLDTGADDTVFEDMNLPGRWKPKMIGGLGGFIKVRQYDQIHIEICGHKAIGTVLVG  
PTPVNIIGRNMLTQIGCTLNF  
>102782\_47 0.3  
PQITLWQRPIVTIKVEGQLKEAPLDTGADDTVLEDVNLPGRWKPKMIGGLGGFIKVRQYDQIHIEICGHKVIGTVLIG  
PTPVNIIGRSMLTQIGCTLNF  
>102782\_52 0.3  
PQITLWQRPIVTIKVEGQLKEAPLDTGADDTVFEDMNLPGRWKPKMIGGLGGFIKVRQYDQIHIEICGHKVIGTVLVG  
PTPVNIIGRNMLTQIGCTLNF  
>102782\_53 0.3  
PQITLWQRPIVTIKVEGQLKEAPLDTGADDTVFEDMNLPGRWKPKMIGGLGGFIKVRQYDQIHIEICGHKVIGTVLVG  
PTPVNIIGRSMLTQIGCTLNF  
>102782\_54 0.3  
PQITLWQRPIVTIKVEGQLKEAPLDTGADDTVFEDMNLPGRWKPKMIGGLGGFIKVRQYDQIHIEICGHKVIGTVLIG  
PTPVNIIGRNMLTQIGCTLNF  
>102782\_55 0.3  
PQITLWQRPIVTIKVEGQLKEAPLDTGADDTVFEDMNLPGRWKPKMIGGLGGFIKVRQYDQIHIEICGHKVIGTVLIG  
PTPVNIIGRSMLTQIGCTLNF  
>102782\_60 0.3  
PQITLWQRPIVTIKVEGQLKEAPLDTGADDTVFEDVNLPGRWKPKMIGGLGGFIKVRQYDQIHIEICGHKVIGTVLVG  
PTPVNIIGRNMLTQIGCTLNF  
>102782\_61 0.3  
PQITLWQRPIVTIKVEGQLKEAPLDTGADDTVFEDVNLPGRWKPKMIGGLGGFIKVRQYDQIHIEICGHKVIGTVLVG  
PTPVNIIGRSMLTQIGCTLNF  
>102782\_62 0.3  
PQITLWQRPIVTIKVEGQLKEAPLDTGADDTVFEDVNLPGRWKPKMIGGLGGFIKVRQYDQIHIEICGHKVIGTVLIG  
PTPVNIIGRNMLTQIGCTLNF  
>102782\_63 0.3  
PQITLWQRPIVTIKVEGQLKEAPLDTGADDTVFEDVNLPGRWKPKMIGGLGGFIKVRQYDQIHIEICGHKVIGTVLIG  
PTPVNIIGRSMLTQIGCTLNF  
>102782\_164 0.3  
PQITLWQRPIVTIKVEGQLTEAPLDTGADDTVLEDMNLPGRWKPKMIGGLGGFIKVRQYDQIHIEICGHKVIGTVLVG  
PTPVNIIGRNMLTQIGCTLNF  
>102782\_165 0.3  
PQITLWQRPIVTIKVEGQLTEAPLDTGADDTVLEDMNLPGRWKPKMIGGLGGFIKVRQYDQIHIEICGHKVIGTVLVG  
PTPVNIIGRSMLTQIGCTLNF  
>102782\_166 0.3  
PQITLWQRPIVTIKVEGQLTEAPLDTGADDTVLEDMNLPGRWKPKMIGGLGGFIKVRQYDQIHIEICGHKVIGTVLIG



PTPVNIIGRNMLTQIGCTLNF  
>102782\_167 0.3  
PQITLWQRPIVTIKVEGQLTEAPLDTGADDTVLEDMNLPGRWKPKMIGGLGGFIKVRQYDQIHIEICGHKVIGTVLIG  
PTPVNIIGRSMLTQIGCTLNF  
>102782\_172 0.3  
PQITLWQRPIVTIKVEGQLTEAPLDTGADDTVLEDVNLPGRWKPKMIGGLGGFIKVRQYDQIHIEICGHKVIGTVLVG  
PTPVNIIGRNMLTQIGCTLNF  
>102782\_173 0.3  
PQITLWQRPIVTIKVEGQLTEAPLDTGADDTVLEDVNLPGRWKPKMIGGLGGFIKVRQYDQIHIEICGHKVIGTVLVG  
PTPVNIIGRSMLTQIGCTLNF  
>102782\_174 0.3  
PQITLWQRPIVTIKVEGQLTEAPLDTGADDTVLEDVNLPGRWKPKMIGGLGGFIKVRQYDQIHIEICGHKVIGTVLIG  
PTPVNIIGRNMLTQIGCTLNF  
>102782\_175 0.3  
PQITLWQRPIVTIKVEGQLTEAPLDTGADDTVLEDVNLPGRWKPKMIGGLGGFIKVRQYDQIHIEICGHKVIGTVLIG  
PTPVNIIGRSMLTQIGCTLNF  
>102782\_180 0.3  
PQITLWQRPIVTIKVEGQLTEAPLDTGADDTVLEDVNLPGRWKPKMIGGLGGFIKVRQYDQIHIEICGHKVIGTVLVG  
PTPVNIIGRNMLTQIGCTLNF  
>102782\_181 0.3  
PQITLWQRPIVTIKVEGQLTEAPLDTGADDTVLEDVNLPGRWKPKMIGGLGGFIKVRQYDQIHIEICGHKVIGTVLVG  
PTPVNIIGRSMLTQIGCTLNF  
>102782\_182 0.3  
PQITLWQRPIVTIKVEGQLTEAPLDTGADDTVLEDVNLPGRWKPKMIGGLGGFIKVRQYDQIHIEICGHKVIGTVLIG  
PTPVNIIGRNMLTQIGCTLNF  
>102782\_183 0.3  
PQITLWQRPIVTIKVEGQLTEAPLDTGADDTVLEDVNLPGRWKPKMIGGLGGFIKVRQYDQIHIEICGHKVIGTVLIG  
PTPVNIIGRSMLTQIGCTLNF  
>102782\_188 0.3  
PQITLWQRPIVTIKVEGQLTEAPLDTGADDTVLEDVNLPGRWKPKMIGGLGGFIKVRQYDQIHIEICGHKVIGTVLVG  
PTPVNIIGRNMLTQIGCTLNF  
>102782\_189 0.3  
PQITLWQRPIVTIKVEGQLTEAPLDTGADDTVLEDVNLPGRWKPKMIGGLGGFIKVRQYDQIHIEICGHKVIGTVLVG  
PTPVNIIGRSMLTQIGCTLNF  
>102782\_190 0.3  
PQITLWQRPIVTIKVEGQLTEAPLDTGADDTVLEDVNLPGRWKPKMIGGLGGFIKVRQYDQIHIEICGHKVIGTVLIG  
PTPVNIIGRNMLTQIGCTLNF  
>102782\_191 0.3  
PQITLWQRPIVTIKVEGQLTEAPLDTGADDTVLEDVNLPGRWKPKMIGGLGGFIKVRQYDQIHIEICGHKVIGTVLIG  
PTPVNIIGRSMLTQIGCTLNF  
>102782\_76 0.3  
PQITLWQRPIVTIKVEGQLIEALLDTGADDTVLEDVNLPGRWKPKMIGGLGGFIKVRQYDQIHIEICGHKVIGTVLVG  
PTPVNIIGRNMLTQIGCTLNF  
>102782\_78 0.3  
PQITLWQRPIVTIKVEGQLIEALLDTGADDTVLEDVNLPGRWKPKMIGGLGGFIKVRQYDQIHIEICGHKVIGTVLIG  
PTPVNIIGRNMLTQIGCTLNF  
>102782\_79 0.3  
PQITLWQRPIVTIKVEGQLIEALLDTGADDTVLEDVNLPGRWKPKMIGGLGGFIKVRQYDQIHIEICGHKVIGTVLIG  
PTPVNIIGRSMLTQIGCTLNF  
>102782\_84 0.3  
PQITLWQRPIVTIKVEGQLIEALLDTGADDTVLEDVNLPGRWKPKMIGGLGGFIKVRQYDQIHIEICGHKVIGTVLVG  
PTPVNIIGRNMLTQIGCTLNF  
>102782\_85 0.3  
PQITLWQRPIVTIKVEGQLIEALLDTGADDTVLEDVNLPGRWKPKMIGGLGGFIKVRQYDQIHIEICGHKVIGTVLVG  
PTPVNIIGRSMLTQIGCTLNF  
>102782\_86 0.3  
PQITLWQRPIVTIKVEGQLIEALLDTGADDTVLEDVNLPGRWKPKMIGGLGGFIKVRQYDQIHIEICGHKVIGTVLIG  
PTPVNIIGRNMLTQIGCTLNF  
>102782\_87 0.3  
PQITLWQRPIVTIKVEGQLIEALLDTGADDTVLEDVNLPGRWKPKMIGGLGGFIKVRQYDQIHIEICGHKVIGTVLIG  
PTPVNIIGRSMLTQIGCTLNF  
>102782\_92 0.3  
PQITLWQRPIVTIKVEGQLIEALLDTGADDTVLEDVNLPGRWKPKMIGGLGGFIKVRQYDQIHIEICGHKVIGTVLVG

PTPVNIIGRNMLTQIGCTLNF  
>102782\_93 0.3  
PQITLWQRPIVTIKVEGQLIEALLDTGADDTVFEDVNLPRWPKMIGGLGGFIKVRQYDQIHIEICGHKVIKTVLVG  
PTPVNIIGRSMLTQIGCTLNF  
>102782\_94 0.3  
PQITLWQRPIVTIKVEGQLIEALLDTGADDTVFEDVNLPRWPKMIGGLGGFIKVRQYDQIHIEICGHKVIKTVLVG  
PTPVNIIGRNMLTQIGCTLNF  
>102782\_95 0.3  
PQITLWQRPIVTIKVEGQLIEALLDTGADDTVFEDVNLPRWPKMIGGLGGFIKVRQYDQIHIEICGHKVIKTVLVG  
PTPVNIIGRSMLTQIGCTLNF  
>102793\_0 0.2  
PQITLWQRPLVTIKIGGQLKEALLDTGADDTVFEDIDLPRWPKMIGGLGGFIKVRQYDQITIEICGHKAIGTVLVG  
PTPVNIIGRNLLTQIGCTLNF  
>102782\_19 0.3  
PQITLWQRPIVTIKVEGQLKEALLDTGADDTVFEDMNLPRWPKMIGGLGGFIKVRQYDQIHIEICGHKAIGTVLVG  
PTPVNIIGRSMLTQIGCTLNF  
>102782\_24 0.3  
PQITLWQRPIVTIKVEGQLKEALLDTGADDTVFEDVNLPRWPKMIGGLGGFIKVRQYDQIHIEICGHKAIGTVLVG  
PTPVNIIGRNMLTQIGCTLNF  
>102782\_25 0.3  
PQITLWQRPIVTIKVEGQLKEALLDTGADDTVFEDVNLPRWPKMIGGLGGFIKVRQYDQIHIEICGHKAIGTVLVG  
PTPVNIIGRSMLTQIGCTLNF  
>102782\_26 0.3  
PQITLWQRPIVTIKVEGQLKEALLDTGADDTVFEDVNLPRWPKMIGGLGGFIKVRQYDQIHIEICGHKAIGTVLVG  
PTPVNIIGRNMLTQIGCTLNF  
>102782\_27 0.3  
PQITLWQRPIVTIKVEGQLKEALLDTGADDTVFEDVNLPRWPKMIGGLGGFIKVRQYDQIHIEICGHKAIGTVLVG  
PTPVNIIGRSMLTQIGCTLNF  
>102782\_128 0.3  
PQITLWQRPIVTIKVEGQLTEALLDTGADDTVLEDMNLPRWPKMIGGLGGFIKVRQYDQIHIEICGHKAIGTVLVG  
PTPVNIIGRNMLTQIGCTLNF  
>102782\_129 0.3  
PQITLWQRPIVTIKVEGQLTEALLDTGADDTVLEDMNLPRWPKMIGGLGGFIKVRQYDQIHIEICGHKAIGTVLVG  
PTPVNIIGRSMLTQIGCTLNF  
>102782\_130 0.3  
PQITLWQRPIVTIKVEGQLTEALLDTGADDTVLEDMNLPRWPKMIGGLGGFIKVRQYDQIHIEICGHKAIGTVLVG  
PTPVNIIGRNMLTQIGCTLNF  
>102782\_131 0.3  
PQITLWQRPIVTIKVEGQLTEALLDTGADDTVLEDMNLPRWPKMIGGLGGFIKVRQYDQIHIEICGHKAIGTVLVG  
PTPVNIIGRSMLTQIGCTLNF  
>102782\_136 0.3  
PQITLWQRPIVTIKVEGQLTEALLDTGADDTVLEDVNLPRWPKMIGGLGGFIKVRQYDQIHIEICGHKAIGTVLVG  
PTPVNIIGRNMLTQIGCTLNF  
>102782\_137 0.3  
PQITLWQRPIVTIKVEGQLTEALLDTGADDTVLEDVNLPRWPKMIGGLGGFIKVRQYDQIHIEICGHKAIGTVLVG  
PTPVNIIGRSMLTQIGCTLNF  
>102782\_138 0.3  
PQITLWQRPIVTIKVEGQLTEALLDTGADDTVLEDVNLPRWPKMIGGLGGFIKVRQYDQIHIEICGHKAIGTVLVG  
PTPVNIIGRNMLTQIGCTLNF  
>102782\_139 0.3  
PQITLWQRPIVTIKVEGQLTEALLDTGADDTVLEDVNLPRWPKMIGGLGGFIKVRQYDQIHIEICGHKAIGTVLVG  
PTPVNIIGRSMLTQIGCTLNF  
>102782\_144 0.3  
PQITLWQRPIVTIKVEGQLTEALLDTGADDTVFEDMNLPRWPKMIGGLGGFIKVRQYDQIHIEICGHKAIGTVLVG  
PTPVNIIGRNMLTQIGCTLNF  
>102782\_145 0.3  
PQITLWQRPIVTIKVEGQLTEALLDTGADDTVFEDMNLPRWPKMIGGLGGFIKVRQYDQIHIEICGHKAIGTVLVG  
PTPVNIIGRSMLTQIGCTLNF  
>102782\_146 0.3  
PQITLWQRPIVTIKVEGQLTEALLDTGADDTVFEDMNLPRWPKMIGGLGGFIKVRQYDQIHIEICGHKAIGTVLVG  
PTPVNIIGRNMLTQIGCTLNF  
>102782\_147 0.3  
PQITLWQRPIVTIKVEGQLTEALLDTGADDTVFEDMNLPRWPKMIGGLGGFIKVRQYDQIHIEICGHKAIGTVLVG

PTPVNIIGRSMLTQIGCTLNF  
>102782\_152 0.3  
PQITLWQRPIVTIKVEGQLTEALLDTGADDTVFEDVNLPGRWPKPKMIGGLGGFIKVRQYDQIHIEICGHKAIGTVLVG  
PTPVNIIGRNMLTQIGCTLNF  
>102782\_153 0.3  
PQITLWQRPIVTIKVEGQLTEALLDTGADDTVFEDVNLPGRWPKPKMIGGLGGFIKVRQYDQIHIEICGHKAIGTVLVG  
PTPVNIIGRSMLTQIGCTLNF  
>102782\_154 0.3  
PQITLWQRPIVTIKVEGQLTEALLDTGADDTVFEDVNLPGRWPKPKMIGGLGGFIKVRQYDQIHIEICGHKAIGTVLIG  
PTPVNIIGRNMLTQIGCTLNF  
>102782\_155 0.3  
PQITLWQRPIVTIKVEGQLTEALLDTGADDTVFEDVNLPGRWPKPKMIGGLGGFIKVRQYDQIHIEICGHKAIGTVLIG  
PTPVNIIGRSMLTQIGCTLNF  
>102782\_7 0.3  
PQITLWQRPIVTIKVEGQLKEALLDTGADDTVLEDMNLPGRWPKPKMIGGLGGFIKVRQYDQIHIEICGHKVIGTVLIG  
PTPVNIIGRSMLTQIGCTLNF  
>102782\_158 0.3  
PQITLWQRPIVTIKVEGQLTEALLDTGADDTVFEDVNLPGRWPKPKMIGGLGGFIKVRQYDQIHIEICGHKVIGTVLIG  
PTPVNIIGRNMLTQIGCTLNF  
>102782\_159 0.3  
PQITLWQRPIVTIKVEGQLTEALLDTGADDTVFEDVNLPGRWPKPKMIGGLGGFIKVRQYDQIHIEICGHKVIGTVLIG  
PTPVNIIGRSMLTQIGCTLNF  
>257929\_0 0.3  
PQITLWQRPLVTVKVGGLKEALLDTGADDTVLEEMNLQGRWPKPKMIGGIGGGFIKVKQYDQIPVEICGHKAIGTVLVG  
PTPVNIIGRNLLTQIGCTLNF

**Sequences for the LPV-resistant ensemble**

>187119\_0 500.0  
PQITLWQRPIIPVRIGGQLKEALLDTGADDTIFEEMTLPGRWQPKIVGGIGGFLKVRQYDQIPIEFCEGYKVMCTVLIG  
STPINVIGRDTLTKIGCTLNF  
>154816\_0 500.0  
PQITLWQRPFITVKIGGQQMEALLDTGADDTIVEAINLPGRWPKPKIVGGIGGFMKVKQYDQVPVEICGHKAITAVLVG  
PTPVNVIGRNVMTQIGCTLNF  
>117033\_2 500.0  
PQITLWQRPIVTIKIGGQIREALLDTGADDTVLEDINLPGRWPKPKLIVGIGGFTKVKEYDQVPIEICGHKVVGTVLVG  
PTPANIIGRNLLTQLGCTLNF  
>117033\_4 500.0  
PQITLWQRPIVTIKIGGQIREALLDTGADDTVLEDINLPGRWEPKLVIGIGGFSKVKEYDQVPIEICGHKVVGTVLVG  
PTPANIIGRNLLTQLGCTLNF  
>117033\_5 500.0  
PQITLWQRPIVTIKIGGQIREALLDTGADDTVLEDINLPGRWEPKLVIGIGGFTKVKEYDQVPIEICGHKVVGTVLVG  
PTPANIIGRNLLTQLGCTLNF  
>147553\_0 500.0  
PQITLWQRPIVTIKIGGQLREALLDGADDTVFETDIDLPGRWTPKIIVGVGGFSKVKQYDQVPIEICGHKVVGTVLIG  
PTPANIVGRNLLTQLGCTLNF  
>81925\_0 500.0  
PQITLWQRPFVTVKIAGQIKEALLDTGADDTVFQEMDLPGRWPKPKLIGGIGGFVKVRQYDQVLIIEFCGHKTTCTVLV  
PTPVNVIGRNLMSQLGCTLNF  
>81925\_2 500.0  
PQITLWQRPFVTVKIAGQVKEALLDTGADDTVFQEMDLPGRWPKPKLIGGIGGFVKVRQYDQVLIIEFCGHKTTCTVLV  
PTPVNVIGRNLMSQLGCTLNF  
>50921\_0 500.0  
PQITLWQRPIVTIKIAGQQKEALLDTGADDTILEEMSLPGKWKPRIAGGIGGFIKVRQYDQIPIEICGHKVVGTVLVG  
PTPANIIGRNLMTKLGCTLNF  
>117063\_1 500.0  
PQITLWQRPVVTVKVAGQLREALLDGADDTIFEINLPGRWTPKIVGGIGGFMKVRQYDQIPIEICGHKVISTVLV  
PTPTNIIGGNLMTQIGCTLNF  
>103779\_0 500.0  
PQITLWQRPIIKVKIGGQLVEALLDTGADDTILEGINLPGRWPKPKIVGGIGGFMKVKKEYDQIPVEICGHKIISTVLV  
PTPVNIIGRNVMVTQIGCTLNF  
>103779\_1 500.0  
PQITLWQRPIIKVKIGGQLVEALLDTGADDTILEGINLPGRWPKPKIVGGIGGFMKVKKEYDQIPVEICGHKIISTVLV  
PTPVNVIGRNVMVTQIGCTLNF

>103779\_2 500.0  
PQITLWQRPIIKVKIGGQLVEALLDTGADDTILEGINLPGRWPKPKIVGGIGGFMKVKEYDQIPVEICGHKVISTVLVG  
PTPVNIIGRNVMTQIGCTLNF

>103779\_3 500.0  
PQITLWQRPIIKVKIGGQLVEALLDTGADDTILEGINLPGRWPKPKIVGGIGGFMKVKEYDQIPVEICGHKVISTVLVG  
PTPVNVIGRNVMTQIGCTLNF

>103779\_4 500.0  
PQITLWQRPIIKVKIGGQLVEALLDTGADDTILEGIDLPGRWPKPKIVGGIGGFMKVKEYDQIPVEICGHKIISTVLVG  
PTPVNIIGRNVMTQIGCTLNF

>103779\_5 500.0  
PQITLWQRPIIKVKIGGQLVEALLDTGADDTILEGIDLPGRWPKPKIVGGIGGFMKVKEYDQIPVEICGHKIISTVLVG  
PTPVNVIGRNVMTQIGCTLNF

>103779\_6 500.0  
PQITLWQRPIIKVKIGGQLVEALLDTGADDTILEGIDLPGRWPKPKIVGGIGGFMKVKEYDQIPVEICGHKVISTVLVG  
PTPVNIIGRNVMTQIGCTLNF

>103779\_7 500.0  
PQITLWQRPIIKVKIGGQLVEALLDTGADDTILEGIDLPGRWPKPKIVGGIGGFMKVKEYDQIPVEICGHKVISTVLVG  
PTPVNVIGRNVMTQIGCTLNF

>103779\_8 500.0  
PQITLWQRPIIKVKIGGQLVEALLDTGADDTIFEGINLPGRWPKPKIVGGIGGFMKVKEYDQIPVEICGHKIISTVLVG  
PTPVNIIGRNVMTQIGCTLNF

>103779\_9 500.0  
PQITLWQRPIIKVKIGGQLVEALLDTGADDTIFEGINLPGRWPKPKIVGGIGGFMKVKEYDQIPVEICGHKIISTVLVG  
PTPVNVIGRNVMTQIGCTLNF

>103779\_10 500.0  
PQITLWQRPIIKVKIGGQLVEALLDTGADDTIFEGINLPGRWPKPKIVGGIGGFMKVKEYDQIPVEICGHKVISTVLVG  
PTPVNIIGRNVMTQIGCTLNF

>103779\_11 500.0  
PQITLWQRPIIKVKIGGQLVEALLDTGADDTIFEGINLPGRWPKPKIVGGIGGFMKVKEYDQIPVEICGHKVISTVLVG  
PTPVNVIGRNVMTQIGCTLNF

>103779\_12 500.0  
PQITLWQRPIIKVKIGGQLVEALLDTGADDTIFEGIDLPGRWPKPKIVGGIGGFMKVKEYDQIPVEICGHKIISTVLVG  
PTPVNIIGRNVMTQIGCTLNF

>103779\_13 500.0  
PQITLWQRPIIKVKIGGQLVEALLDTGADDTIFEGIDLPGRWPKPKIVGGIGGFMKVKEYDQIPVEICGHKIISTVLVG  
PTPVNVIGRNVMTQIGCTLNF

>103779\_14 500.0  
PQITLWQRPIIKVKIGGQLVEALLDTGADDTIFEGIDLPGRWPKPKIVGGIGGFMKVKEYDQIPVEICGHKVISTVLVG  
PTPVNIIGRNVMTQIGCTLNF

>103779\_15 500.0  
PQITLWQRPIIKVKIGGQLVEALLDTGADDTIFEGIDLPGRWPKPKIVGGIGGFMKVKEYDQIPVEICGHKVISTVLVG  
PTPVNVIGRNVMTQIGCTLNF

>147550\_0 500.0  
PQITLWQRPIIKVKIGGQLVEALLDTGADDTIFEGIDLPGRWPKPKIVGGIGGFMKVKEYDQIPVEICGHKVISTVLVG  
PTPVNVIGRNVMTQIGCTLNF

>103057\_2 500.0  
PQITLWQRPIVTVKIGGQLREALLDTGADDTVFEDIELPGRWTPKIIGGIGGFVKVKQYEEVPVEICEHKTATVLVG  
PTPFNIIGRNLMTQLGCTLNF

>117027\_0 500.0  
PQITLWQRPFVTVKIGGQPKREALLDTGADNTVFEDINLPGRWTPKIIGGIGGFVRVKQYDQVPIEICGHKTIGTILVG  
PTPANIIGRDVLTQIGCTLNF

>117027\_1 500.0  
PQITLWQRPFVTVKIGGQPKREALLDTGADNTVFEDINLPGRWTPKIIGGIGGFVRVKQYDQVPIEICGHKTMGTILVG  
PTPANIIGRDVLTQIGCTLNF

>143473\_1 500.0  
PQITLWQRPIVTVKIGGQLREALLDTGADDTVFEDIDLPGRWTPKLIIGGIGGFVKVRQYDQVPIEICGHKITSTVLVG  
PTPANIIGRNLMTQLGCTLNF

>143473\_3 500.0  
PQITLWQRPIVTVKIGGQLREALLDTGADDTVFEDIDLPGRWTPKLIIGGIGGFVKVRQYDQVPIEICGHKVSTSTVLVG  
PTPANIIGRNLMTQLGCTLNF

>143473\_5 500.0  
PQITLWQRPIVTVKIGGQLREALLDTGADDTVFEDIDLPGRWTPKLIIGGIGGFVRVRQYDQVPIEICGHKITSTVLVG  
PTPANIIGRNLMTQLGCTLNF

>143473\_7 500.0  
PQITLWQRPIVTVKIGGQLREALLDTGADDTVFEDIDLPGRWTPKLIGGIGGFVVRVRYDQVPIEICGHKVTSTVLVG  
PTPANIIGRNLMTQLGCTLNF

>143473\_9 500.0  
PQITLWQRPIVTVKIGGQIREALLDTGADDTVFEDIDLPGRWTPKLIGGIGGFVKVRQYDQVPIEICGHKITSTVLVG  
PTPANIIGRNLMTQLGCTLNF

>143473\_11 500.0  
PQITLWQRPIVTVKIGGQIREALLDTGADDTVFEDIDLPGRWTPKLIGGIGGFVKVRQYDQVPIEICGHKVTSTVLVG  
PTPANIIGRNLMTQLGCTLNF

>143473\_13 500.0  
PQITLWQRPIVTVKIGGQIREALLDTGADDTVFEDIDLPGRWTPKLIGGIGGFVVRVRYDQVPIEICGHKITSTVLVG  
PTPANIIGRNLMTQLGCTLNF

>143473\_15 500.0  
PQITLWQRPIVTVKIGGQIREALLDTGADDTVFEDIDLPGRWTPKLIGGIGGFVVRVRYDQVPIEICGHKVTSTVLVG  
PTPANIIGRNLMTQLGCTLNF

>115081\_0 500.0  
PQITLWQRPIVTIKIGGQLREALLDTGADDTVLEDIDLPGRWKPKLIVGIGGFVKVRQYEQVPIEICGHKVVGTVLIG  
PTPSNIIGRNLMTQLGCTLNF

>86742\_0 500.0  
PQITLWQRPFITIKIGGQLREALLDTGADDTIFEDIQLPGRWPKKIVGGIGGFLKVKEYEQVPIEICGHKVISTVLTG  
PTPVNVIGRNVMTQLGCTLNF

>86742\_1 500.0  
PQITLWQRPFITVKIGGQLREALLDTGADDTIFEDIQLPGRWPKKIVGGIGGFLKVKEYEQVPIEICGHKVISTVLTG  
PTPVNVIGRNVMTQLGCTLNF

>82251\_0 500.0  
PQITLWQRPIVTVKIGGQLKEALLDTGADDTIFEEINLPGRWPKMAGGIGGFIKVRQYDQIPIEICGHEVIGTVLVG  
PTPANIIGRNLMTQLGCTLNF

>82251\_1 500.0  
PQITLWQRPIVTVKIGGQLKEALLDTGADDTIFEEINLPGRWPKIAGGIGGFIKVRQYDQIPIEICGHEVIGTVLVG  
PTPANIIGRNLMTQLGCTLNF

>82251\_3 500.0  
PQITLWQRPIVTVKIGGQLKEALLDTGADDTIFEEINLPKWKPKMAGGIGGFIKVRQYDQIPIEICGHEVIGTVLVG  
PTPANIIGRNLMTQLGCTLNF

>82251\_4 500.0  
PQITLWQRPIVTVKIGGQLKEALLDTGADDTIFEEINLPKWKPKIAGGIGGFIKVRQYDQIPIEICGHEVIGTVLVG  
PTPANIIGRNLMTQLGCTLNF

>82251\_5 500.0  
PQITLWQRPIVTVKIGGQLKEALLDTGADDTIFEEINLPKWKPKLAGGIGGFIKVRQYDQIPIEICGHEVIGTVLVG  
PTPANIIGRNLMTQLGCTLNF

>116999\_0 500.0  
PQITLWQRPVVTIKVGGQIKEALLDTGADDTILEEMNLPGRWPKIAGGIGGFIKVRQYDQIPIEICGHKVIGTVLIG  
PTPANIIGRNLMTQLGCTLNF

>116999\_1 500.0  
PQITLWQRPVVTIKVGGQIKEALLDTGADDTILEEMNLPGRWPKIAGGIGGFIKVRQYDQIPIEICGHEVIGTVLIG  
PTPANIIGRNLMTQLGCTLNF

>116999\_2 500.0  
PQITLWQRPVVTIKVGGQIKEALLDTGADDTILEEMNLPGRWPKIAGGIGGFIKVREYDQIPIEICGHKVIGTVLIG  
PTPANIIGRNLMTQLGCTLNF

>116999\_3 500.0  
PQITLWQRPVVTIKVGGQIKEALLDTGADDTILEEMNLPGRWPKIAGGIGGFIKVREYDQIPIEICGHEVIGTVLIG  
PTPANIIGRNLMTQLGCTLNF

>116999\_4 500.0  
PQITLWQRPVVTIKVGGQIKEALLDTGADDTILEEMNLPGRWPKIAGGIGGFINVRQYDQIPIEICGHKVIGTVLIG  
PTPANIIGRNLMTQLGCTLNF

>116999\_5 500.0  
PQITLWQRPVVTIKVGGQIKEALLDTGADDTILEEMNLPGRWPKIAGGIGGFINVRQYDQIPIEICGHEVIGTVLIG  
PTPANIIGRNLMTQLGCTLNF

>116999\_6 500.0  
PQITLWQRPVVTIKVGGQIKEALLDTGADDTILEEMNLPGRWPKIAGGIGGFINVRQYDQIPIEICGHKVIGTVLIG  
PTPANIIGRNLMTQLGCTLNF

>116999\_7 500.0  
PQITLWQRPVVTIKVGGQIKEALLDTGADDTILEEMNLPGRWPKIAGGIGGFINVRQYDQIPIEICGHEVIGTVLIG  
PTPANIIGRNLMTQLGCTLNF

>116999\_8 500.0  
PQITLWQRPVVTIKVGGQIKEALLDTGADDTIFEEMNLPGRWPKIAGGIGGFIKVRQYDQIPIEICGHKVIQTVLIG  
PTPANIIGRNLLTQLGCTLNF

>116999\_9 500.0  
PQITLWQRPVVTIKVGGQIKEALLDTGADDTIFEEMNLPGRWPKIAGGIGGFIKVRQYDQIPIEICGHEVIGTVLIG  
PTPANIIGRNLLTQLGCTLNF

>116999\_10 500.0  
PQITLWQRPVVTIKVGGQIKEALLDTGADDTIFEEMNLPGRWPKIAGGIGGFIKVRQYDQIPIEICGHKVIQTVLIG  
PTPANIIGRNLLTQLGCTLNF

>116999\_11 500.0  
PQITLWQRPVVTIKVGGQIKEALLDTGADDTIFEEMNLPGRWPKIAGGIGGFIKVRQYDQIPIEICGHEVIGTVLIG  
PTPANIIGRNLLTQLGCTLNF

>116999\_12 500.0  
PQITLWQRPVVTIKVGGQIKEALLDTGADDTIFEEMNLPGRWPKIAGGIGGFINVRQYDQIPIEICGHKVIQTVLIG  
PTPANIIGRNLLTQLGCTLNF

>116999\_13 500.0  
PQITLWQRPVVTIKVGGQIKEALLDTGADDTIFEEMNLPGRWPKIAGGIGGFINVRQYDQIPIEICGHEVIGTVLIG  
PTPANIIGRNLLTQLGCTLNF

>116999\_14 500.0  
PQITLWQRPVVTIKVGGQIKEALLDTGADDTIFEEMNLPGRWPKIAGGIGGFINVREYDQIPIEICGHKVIQTVLIG  
PTPANIIGRNLLTQLGCTLNF

>116999\_15 500.0  
PQITLWQRPVVTIKVGGQIKEALLDTGADDTIFEEMNLPGRWPKIAGGIGGFINVREYDQIPIEICGHEVIGTVLIG  
PTPANIIGRNLLTQLGCTLNF

>116999\_16 500.0  
PQITLWQRPVVTIKVGGQIKEALLDTGADDTIFEEMNLPGRWPKIAGGIGGFIKVRQYDQIPIEICGHKVIQTVLIG  
PTPANIIGRNLLTQLGCTLNF

>117063\_0 500.0  
PQITLWQRPVVTIKVAGQLREALLDTGADDTIFEEMNLPGRWTPKIVGGIGGFMKVRQYDQIPIEICGHKVISTVLVG  
PTPTNIIGRNLMTQIGCTLNF

>115739\_2 500.0  
PQITLWQRPVVTIKVGGQLREALLDTGADDTIFEDISLPGKWTPKIVGGIGGLIKVKQYDQIPIEICGHKVISTVLVG  
PTPANIIGRNLMTQLGCTLNF

>115739\_3 500.0  
PQITLWQRPVVTIKVGGQLREALLDTGADDTIFEDISLPGKWTPKIVGGIGGLIKVKQYDQIPIEICGHKVISTVLVG  
PTPANIIGRNLMTQLGFTLNF

>143473\_0 500.0  
PQITLWQRPVVTIKVGGQLREALLDTGADDTVFEDIDLPGRWTPKLIIGGIGGFVKVRQYDQVPIEICGHKIISTVLVG  
PTPANIIGRNLMTQLGCTLNF

>143473\_2 500.0  
PQITLWQRPVVTIKVGGQLREALLDTGADDTVFEDIDLPGRWTPKLIIGGIGGFVKVRQYDQVPIEICGHKVISTVLVG  
PTPANIIGRNLMTQLGCTLNF

>143473\_4 500.0  
PQITLWQRPVVTIKVGGQLREALLDTGADDTVFEDIDLPGRWTPKLIIGGIGGFVVRQYDQVPIEICGHKIISTVLVG  
PTPANIIGRNLMTQLGCTLNF

>143473\_6 500.0  
PQITLWQRPVVTIKVGGQLREALLDTGADDTVFEDIDLPGRWTPKLIIGGIGGFVVRQYDQVPIEICGHKVISTVLVG  
PTPANIIGRNLMTQLGCTLNF

>143473\_8 500.0  
PQITLWQRPVVTIKVGGQIREALLDTGADDTVFEDIDLPGRWTPKLIIGGIGGFVKVRQYDQVPIEICGHKIISTVLVG  
PTPANIIGRNLMTQLGCTLNF

>143473\_10 500.0  
PQITLWQRPVVTIKVGGQIREALLDTGADDTVFEDIDLPGRWTPKLIIGGIGGFVKVRQYDQVPIEICGHKVISTVLVG  
PTPANIIGRNLMTQLGCTLNF

>143473\_12 500.0  
PQITLWQRPVVTIKVGGQIREALLDTGADDTVFEDIDLPGRWTPKLIIGGIGGFVVRQYDQVPIEICGHKIISTVLVG  
PTPANIIGRNLMTQLGCTLNF

>143473\_14 500.0  
PQITLWQRPVVTIKVGGQIREALLDTGADDTVFEDIDLPGRWTPKLIIGGIGGFVVRQYDQVPIEICGHKVISTVLVG  
PTPANIIGRNLMTQLGCTLNF

>103067\_0 500.0  
PQITLWQRPFITVKIAGQLKEALLDTGADDTVFQEMNLPGRWIPKLIIGGIAGFMKVRQYDQIPMEIYGHKVMATVLVG  
PTPVNVIGRNLMTQIGCTLNF

>103067\_1 500.0  
PQITLWQRPFITVKIAGQVKEALLDTGADDTVFQEMNLPGRWIPKLIGGIAGFMKVRQYDQIPMEIYGHKVMATVLVG  
PTPVNVIGRNLMTQIGCTLNF

>145212\_0 500.0  
PQITLWQRPIVTVKIAGQLKEALLDTGADDTIFEEMNLPGRWTPKLIIGGIGGFLKVRQYDQVPIEICGHKVIQVPLVG  
PTPVNVIGRNLMSQIGCTLNF

>107977\_0 500.0  
PQITLWQRPIVTIKIGGQLREALIDTGADDTVLEDMDLPGRWPKIIGGIGGFVKVRQYDHPVEICGHKVVGSVVVG  
PTPTNIIGRNLTLQIGCTLNF

>107977\_1 500.0  
PQITLWQRPIVTIKIGGQLREALIDTGADDTVLEDMDLPGRWPKIIGGIGGFVKVKQYDHPVEICGHKVVGSVVVG  
PTPTNIIGRNLTLQIGCTLNF

>107977\_2 500.0  
PQITLWQRPIVTIKIGGQLREALIDTGADDTVLEDMDLPGRWPKIIGGIGGFVKVRQYDHPVEICGHKVVGSVVVG  
PTPTNIIGRNLTLQIGCTLNF

>107977\_3 500.0  
PQITLWQRPIVTIKIGGQLREALIDTGADDTVLEDMDLPGRWPKIIGGIGGFVKVKQYDHPVEICGHKVVGSVVVG  
PTPTNIIGRNLTLQIGCTLNF

>117069\_0 500.0  
PQITLWQRPIVTVKIAGQLTEALLDTGADDTIFQDINLPGRWTPKIVGGIGGLLRVRQYEQVPIEVCGHKIITTVLIG  
PTPVNVLGRNLMTQIGCTLNF

>117069\_1 500.0  
PQITLWQRPIVTVKVAGQLTEALLDTGADDTIFQDINLPGRWTPKIVGGIGGLLRVRQYEQVPIEVCGHKIITTVLIG  
PTPVNVLGRNLMTQIGCTLNF

>117053\_0 500.0  
PQITLWQRPIVTIKIGGQLREALLDTGADDTVLEDINLPGRWPKLIIGGIGGFVKVREYEEIPVEICGHKVIQTVLVG  
PTPFNVVGRNLLTLQIGCTLNF

>117053\_1 500.0  
PQITLWQRPIVTIKIGGQLREALLDTGADDTVLEDINLPGRWPKLIIGGIGGFVKVREYEEIPVEVCGHKVIQTVLVG  
PTPFNVVGRNLLTLQIGCTLNF

>117053\_2 500.0  
PQITLWQRPIVTIKIGGQLREALLDTGADDTVLEDINLPGRWPKLIIGGIGGFVKVREYEEIPVDICGHKVIQTVLVG  
PTPFNVVGRNLLTLQIGCTLNF

>117053\_3 500.0  
PQITLWQRPIVTIKIGGQLREALLDTGADDTVLEDINLPGRWPKLIIGGIGGFVKVREYEEIPVDVCGHKVIQTVLVG  
PTPFNVVGRNLLTLQIGCTLNF

>117053\_4 500.0  
PQITLWQRPIVTIKIGGQLREALLDTGADDTVLEDINLPGRWPKLIIGGIGGFVKVREYEEVPVEICGHKVIQTVLVG  
PTPFNVVGRNLLTLQIGCTLNF

>117053\_5 500.0  
PQITLWQRPIVTIKIGGQLREALLDTGADDTVLEDINLPGRWPKLIIGGIGGFVKVREYEEVPVEVCGHKVIQTVLVG  
PTPFNVVGRNLLTLQIGCTLNF

>117053\_6 500.0  
PQITLWQRPIVTIKIGGQLREALLDTGADDTVLEDINLPGRWPKLIIGGIGGFVKVREYEEVPVDICGHKVIQTVLVG  
PTPFNVVGRNLLTLQIGCTLNF

>117053\_7 500.0  
PQITLWQRPIVTIKIGGQLREALLDTGADDTVLEDINLPGRWPKLIIGGIGGFVKVREYEEVPVDVCGHKVIQTVLVG  
PTPFNVVGRNLLTLQIGCTLNF

>117053\_8 500.0  
PQITLWQRPIVTIKVGGQLREALLDTGADDTVLEDINLPGRWPKLIIGGIGGFVKVREYEEIPVEICGHKVIQTVLVG  
PTPFNVVGRNLLTLQIGCTLNF

>117053\_9 500.0  
PQITLWQRPIVTIKVGGQLREALLDTGADDTVLEDINLPGRWPKLIIGGIGGFVKVREYEEIPVEVCGHKVIQTVLVG  
PTPFNVVGRNLLTLQIGCTLNF

>117053\_10 500.0  
PQITLWQRPIVTIKVGGQLREALLDTGADDTVLEDINLPGRWPKLIIGGIGGFVKVREYEEIPVDICGHKVIQTVLVG  
PTPFNVVGRNLLTLQIGCTLNF

>117053\_11 500.0  
PQITLWQRPIVTIKVGGQLREALLDTGADDTVLEDINLPGRWPKLIIGGIGGFVKVREYEEIPVDVCGHKVIQTVLVG  
PTPFNVVGRNLLTLQIGCTLNF

>117053\_12 500.0  
PQITLWQRPIVTIKVGGQLREALLDTGADDTVLEDINLPGRWPKLIIGGIGGFVKVREYEEVPVEICGHKVIQTVLVG  
PTPFNVVGRNLLTLQIGCTLNF

>117053\_13 500.0  
PQITLWQRPIVTIKVGGQLREALDGTGADDTVLEDINLPGRWKPKLIGGIGGFVKVREYEEVPVEVCGHKVIGTVLVG  
PTPFNVVGRNLLTQLGCTLNF  
>117053\_14 500.0  
PQITLWQRPIVTIKVGGQLREALDGTGADDTVLEDINLPGRWKPKLIGGIGGFVKVREYEEVPVDICGHKVIGTVLVG  
PTPFNVVGRNLLTQLGCTLNF  
>117053\_15 500.0  
PQITLWQRPIVTIKVGGQLREALDGTGADDTVLEDINLPGRWKPKLIGGIGGFVKVREYEEVPVDVCGHKVIGTVLVG  
PTPFNVVGRNLLTQLGCTLNF

**Sequences for the LPV-susceptible ensemble**

>81851\_0 0.3  
PQITLWQRPLVPIRIEQLKEALLDGTGADDTVIEEMSLSGRWKPKMIGGIGGFVKVREYEEVPIEICGHKAIGTVLVG  
PTPVNIIGRNLLTQLGCTLNF  
>102783\_3 0.3  
PQITLWQRPIVTIKVGGQLKEALLDGTGADDTVLEDMNLPGRWKPKMIGGIGGFVKVREYEEVPLEICGHKVTGTVLIG  
STPVNIIGRNLLTQLGCTLNF  
>102783\_2 0.3  
PQITLWQRPIVTIKVGGQLKEALLDGTGADDTVLEDMNLPGRWKPKMIGGIGGFVKVREYEEVPLEICGHKVTGTVLIG  
ATPVNIIGRNLLTQLGCTLNF  
>102782\_36 0.3  
PQITLWQRPIVTIKVEGQLKEAPLDTGADDTVLEDMNLPGRWKPKMIGGLGGFIKVRQYDQIHIEICGHKVIGTVLVG  
PTPVNIIGRNMLTQIGCTLNF  
>102782\_173 0.3  
PQITLWQRPIVTIKVEGQLTEAPLDTGADDTVLEDVNLPGRWKPKMIGGLGGFIKVRQYDQIHIEICGHKVIGTVLVG  
PTPVNIIGRSMLTQIGCTLNF  
>102782\_174 0.3  
PQITLWQRPIVTIKVEGQLTEAPLDTGADDTVLEDVNLPGRWKPKMIGGLGGFIKVRQYDQIHIEICGHKVIGTVLIG  
PTPVNIIGRNMLTQIGCTLNF  
>102782\_175 0.3  
PQITLWQRPIVTIKVEGQLTEAPLDTGADDTVLEDVNLPGRWKPKMIGGLGGFIKVRQYDQIHIEICGHKVIGTVLIG  
PTPVNIIGRSMLTQIGCTLNF  
>102782\_180 0.3  
PQITLWQRPIVTIKVEGQLTEAPLDTGADDTVFEDMNLPGRWKPKMIGGLGGFIKVRQYDQIHIEICGHKVIGTVLVG  
PTPVNIIGRNMLTQIGCTLNF  
>102782\_181 0.3  
PQITLWQRPIVTIKVEGQLTEAPLDTGADDTVFEDMNLPGRWKPKMIGGLGGFIKVRQYDQIHIEICGHKVIGTVLVG  
PTPVNIIGRSMLTQIGCTLNF  
>102782\_182 0.3  
PQITLWQRPIVTIKVEGQLTEAPLDTGADDTVFEDMNLPGRWKPKMIGGLGGFIKVRQYDQIHIEICGHKVIGTVLIG  
PTPVNIIGRNMLTQIGCTLNF  
>102782\_183 0.3  
PQITLWQRPIVTIKVEGQLTEAPLDTGADDTVFEDMNLPGRWKPKMIGGLGGFIKVRQYDQIHIEICGHKVIGTVLIG  
PTPVNIIGRSMLTQIGCTLNF  
>102782\_188 0.3  
PQITLWQRPIVTIKVEGQLTEAPLDTGADDTVFEDVNLPGRWKPKMIGGLGGFIKVRQYDQIHIEICGHKVIGTVLVG  
PTPVNIIGRNMLTQIGCTLNF  
>102782\_189 0.3  
PQITLWQRPIVTIKVEGQLTEAPLDTGADDTVFEDVNLPGRWKPKMIGGLGGFIKVRQYDQIHIEICGHKVIGTVLVG  
PTPVNIIGRSMLTQIGCTLNF  
>102782\_190 0.3  
PQITLWQRPIVTIKVEGQLTEAPLDTGADDTVFEDVNLPGRWKPKMIGGLGGFIKVRQYDQIHIEICGHKVIGTVLIG  
PTPVNIIGRNMLTQIGCTLNF  
>102782\_191 0.3  
PQITLWQRPIVTIKVEGQLTEAPLDTGADDTVFEDVNLPGRWKPKMIGGLGGFIKVRQYDQIHIEICGHKVIGTVLIG  
PTPVNIIGRSMLTQIGCTLNF  
>102782\_32 0.3  
PQITLWQRPIVTIKVEGQLKEAPLDTGADDTVLEDMNLPGRWKPKMIGGLGGFIKVRQYDQIHIEICGHKAIGTVLVG  
PTPVNIIGRNMLTQIGCTLNF  
>102782\_33 0.3  
PQITLWQRPIVTIKVEGQLKEAPLDTGADDTVLEDMNLPGRWKPKMIGGLGGFIKVRQYDQIHIEICGHKAIGTVLVG  
PTPVNIIGRSMLTQIGCTLNF  
>102782\_34 0.3



PQITLWQRPIVTIKVEGQLKEAPLDTGADDTVLED MNLPGRWKPKMIGGLGGFIKVRQYDQIHIEICGHKAIGTVLIG  
PTPVNIIGRNMLTQIGCTLNF  
>102782\_35 0.3  
PQITLWQRPIVTIKVEGQLKEAPLDTGADDTVLED MNLPGRWKPKMIGGLGGFIKVRQYDQIHIEICGHKAIGTVLIG  
PTPVNIIGRSMLTQIGCTLNF  
>102782\_40 0.3  
PQITLWQRPIVTIKVEGQLKEAPLDTGADDTVLEDVNL PGRWKPKMIGGLGGFIKVRQYDQIHIEICGHKAIGTVLVG  
PTPVNIIGRNMLTQIGCTLNF  
>102782\_41 0.3  
PQITLWQRPIVTIKVEGQLKEAPLDTGADDTVLEDVNL PGRWKPKMIGGLGGFIKVRQYDQIHIEICGHKAIGTVLVG  
PTPVNIIGRSMLTQIGCTLNF  
>102782\_59 0.3  
PQITLWQRPIVTIKVEGQLKEAPLDTGADDTVLEDVNL PGRWKPKMIGGLGGFIKVRQYDQIHIEICGHKAIGTVLIG  
PTPVNIIGRSMLTQIGCTLNF  
>102782\_160 0.3  
PQITLWQRPIVTIKVEGQLTEAPLDTGADDTVLED MNLPGRWKPKMIGGLGGFIKVRQYDQIHIEICGHKAIGTVLVG  
PTPVNIIGRNMLTQIGCTLNF  
>102782\_161 0.3  
PQITLWQRPIVTIKVEGQLTEAPLDTGADDTVLED MNLPGRWKPKMIGGLGGFIKVRQYDQIHIEICGHKAIGTVLVG  
PTPVNIIGRSMLTQIGCTLNF  
>102782\_162 0.3  
PQITLWQRPIVTIKVEGQLTEAPLDTGADDTVLED MNLPGRWKPKMIGGLGGFIKVRQYDQIHIEICGHKAIGTVLIG  
PTPVNIIGRNMLTQIGCTLNF  
>102782\_163 0.3  
PQITLWQRPIVTIKVEGQLTEAPLDTGADDTVLED MNLPGRWKPKMIGGLGGFIKVRQYDQIHIEICGHKAIGTVLIG  
PTPVNIIGRSMLTQIGCTLNF  
>102783\_1 0.3  
PQITLWQRPIITIKIGGQLKEALLDTGADDTVLED MNLPGRWKPKMIGGIGGFIKVRQYDEVPLEICGHKVTGTVLIG  
STPVNIIGRNLLTQLGCTLNF  
>102782\_4 0.3  
PQITLWQRPIVTIKVEGQLKEALLDTGADDTVLED MNLPGRWKPKMIGGLGGFIKVRQYDQIHIEICGHKVIGTVLVG  
PTPVNIIGRNMLTQIGCTLNF  
>102782\_5 0.3  
PQITLWQRPIVTIKVEGQLKEALLDTGADDTVLED MNLPGRWKPKMIGGLGGFIKVRQYDQIHIEICGHKVIGTVLVG  
PTPVNIIGRSMLTQIGCTLNF  
>102782\_6 0.3  
PQITLWQRPIVTIKVEGQLKEALLDTGADDTVLED MNLPGRWKPKMIGGLGGFIKVRQYDQIHIEICGHKVIGTVLIG  
PTPVNIIGRNMLTQIGCTLNF  
>102782\_0 0.3  
PQITLWQRPIVTIKVEGQLKEALLDTGADDTVLED MNLPGRWKPKMIGGLGGFIKVRQYDQIHIEICGHKAIGTVLVG  
PTPVNIIGRNMLTQIGCTLNF  
>102782\_10 0.3  
PQITLWQRPIVTIKVEGQLKEALLDTGADDTVLEDVNL PGRWKPKMIGGLGGFIKVRQYDQIHIEICGHKAIGTVLIG  
PTPVNIIGRNMLTQIGCTLNF  
>102782\_11 0.3  
PQITLWQRPIVTIKVEGQLKEALLDTGADDTVLEDVNL PGRWKPKMIGGLGGFIKVRQYDQIHIEICGHKAIGTVLIG  
PTPVNIIGRSMLTQIGCTLNF  
>102782\_16 0.3  
PQITLWQRPIVTIKVEGQLKEALLDTGADDTVLED MNLPGRWKPKMIGGLGGFIKVRQYDQIHIEICGHKAIGTVLVG  
PTPVNIIGRNMLTQIGCTLNF  
>102782\_17 0.3  
PQITLWQRPIVTIKVEGQLKEALLDTGADDTVLED MNLPGRWKPKMIGGLGGFIKVRQYDQIHIEICGHKAIGTVLVG  
PTPVNIIGRSMLTQIGCTLNF  
>102782\_129 0.3  
PQITLWQRPIVTIKVEGQLTEALLDTGADDTVLED MNLPGRWKPKMIGGLGGFIKVRQYDQIHIEICGHKAIGTVLVG  
PTPVNIIGRSMLTQIGCTLNF  
>10574\_1 0.3  
PQITLLQRPLVTIKIGGQIKEALLDTGADDTVLEGI ELPGRWKPKMIGGIGGFIKVRQYEQVPVEICGHKAIGTVLVG  
PTPVDIIGRNLM TQLGCTLNF  
>105308\_14 0.3  
PQITLWQRPIVTVKVGQLKEALIDTGADDTVLE EIELPGRWKPKIIGGIGGFVKVRQYDQIPIEICGHKIIGTVLVG  
PTPTNIIGRNLLTQIGCTLNF  
>105308\_27 0.3

PQITLWQRPIVTVRVGGQLKEALIDTGADDTVLEEEIELPGRWPKIIGGIGGFVKVRQYDQIPIEICGHKVIIGTVLVG  
PTPTNIIGRNLLTQLGCTLNF  
>105308\_30 0.3  
PQITLWQRPIVTVRVGGQLKEALIDTGADDTVLEEEIELPGRWPKIIGGIGGFVKVRQYDQIPIEICGHKIIIGTVLVG  
PTPTNIIGRNLLTQIGCTLNF  
>105308\_31 0.3  
PQITLWQRPIVTVRVGGQLKEALIDTGADDTVLEEEIELPGRWPKIIGGIGGFVKVRQYDQIPIEICGHKIIIGTVLVG  
PTPTNIIGRNLLTQLGCTLNF  
>105308\_34 0.3  
PQITLWQRPVVTVKVGGQLKEALIDTGADDTVLEEMELPGRWPKIIGGIGGFVKVRQYDQIPIEICGHKVIIGTVLVG  
PTPTNIIGRNLLTQIGCTLNF  
>105308\_35 0.3  
PQITLWQRPVVTVKVGGQLKEALIDTGADDTVLEEMELPGRWPKIIGGIGGFVKVRQYDQIPIEICGHKVIIGTVLVG  
PTPTNIIGRNLLTQLGCTLNF  
>105308\_38 0.3  
PQITLWQRPVVTVKVGGQLKEALIDTGADDTVLEEMELPGRWPKIIGGIGGFVKVRQYDQIPIEICGHKIIIGTVLVG  
PTPTNIIGRNLLTQIGCTLNF  
>105308\_39 0.3  
PQITLWQRPVVTVKVGGQLKEALIDTGADDTVLEEMELPGRWPKIIGGIGGFVKVRQYDQIPIEICGHKIIIGTVLVG  
PTPTNIIGRNLLTQLGCTLNF  
>105308\_42 0.3  
PQITLWQRPVVTVKVGGQLKEALIDTGADDTVLEEEIELPGRWPKIIGGIGGFVKVRQYDQIPIEICGHKVIIGTVLVG  
PTPTNIIGRNLLTQIGCTLNF  
>105308\_43 0.3  
PQITLWQRPVVTVKVGGQLKEALIDTGADDTVLEEEIELPGRWPKIIGGIGGFVKVRQYDQIPIEICGHKVIIGTVLVG  
PTPTNIIGRNLLTQLGCTLNF  
>105308\_46 0.3  
PQITLWQRPVVTVKVGGQLKEALIDTGADDTVLEEEIELPGRWPKIIGGIGGFVKVRQYDQIPIEICGHKIIIGTVLVG  
PTPTNIIGRNLLTQIGCTLNF  
>105308\_47 0.3  
PQITLWQRPVVTVKVGGQLKEALIDTGADDTVLEEEIELPGRWPKIIGGIGGFVKVRQYDQIPIEICGHKIIIGTVLVG  
PTPTNIIGRNLLTQLGCTLNF  
>105308\_50 0.3  
PQITLWQRPVVTVRVGGQLKEALIDTGADDTVLEEMELPGRWPKIIGGIGGFVKVRQYDQIPIEICGHKVIIGTVLVG  
PTPTNIIGRNLLTQIGCTLNF  
>105308\_51 0.3  
PQITLWQRPVVTVRVGGQLKEALIDTGADDTVLEEMELPGRWPKIIGGIGGFVKVRQYDQIPIEICGHKVIIGTVLVG  
PTPTNIIGRNLLTQLGCTLNF  
>105308\_54 0.3  
PQITLWQRPVVTVRVGGQLKEALIDTGADDTVLEEMELPGRWPKIIGGIGGFVKVRQYDQIPIEICGHKIIIGTVLVG  
PTPTNIIGRNLLTQIGCTLNF  
>105308\_55 0.3  
PQITLWQRPVVTVRVGGQLKEALIDTGADDTVLEEMELPGRWPKIIGGIGGFVKVRQYDQIPIEICGHKIIIGTVLVG  
PTPTNIIGRNLLTQLGCTLNF  
>105308\_58 0.3  
PQITLWQRPVVTVRVGGQLKEALIDTGADDTVLEEEIELPGRWPKIIGGIGGFVKVRQYDQIPIEICGHKVIIGTVLVG  
PTPTNIIGRNLLTQIGCTLNF  
>105308\_59 0.3  
PQITLWQRPVVTVRVGGQLKEALIDTGADDTVLEEEIELPGRWPKIIGGIGGFVKVRQYDQIPIEICGHKVIIGTVLVG  
PTPTNIIGRNLLTQLGCTLNF  
>105308\_62 0.3  
PQITLWQRPVVTVRVGGQLKEALIDTGADDTVLEEEIELPGRWPKIIGGIGGFVKVRQYDQIPIEICGHKIIIGTVLVG  
PTPTNIIGRNLLTQIGCTLNF  
>105308\_63 0.3  
PQITLWQRPVVTVRVGGQLKEALIDTGADDTVLEEEIELPGRWPKIIGGIGGFVKVRQYDQIPIEICGHKIIIGTVLVG  
PTPTNIIGRNLLTQLGCTLNF  
>75054\_0 0.3  
PQITLWQRPLVTIKIGGQLKEALLDTGADDTVLEEMNLPGRWPKMIGGIGGFVKVRQYDQITIEICGHKAIGTVLVG  
PTPVNIIGRNLLTQIGCTLNF  
>75054\_2 0.3  
PQITLWQRPLVTIKIGGQLKEALLDTGADDTVLEEMNLPGRWPKMIGGIGGFVKVRQYDQITIDICGHKAIGTVLVG  
PTPVNIIGRNLLTQIGCTLNF  
>75054\_4 0.3

PQITLWQRPLVTIKIGGQLKEALLDTGADDTVLEEINLPGRWKPKMIGGIGGFIKVRQYDQITIEICGHKAIGTVLVG  
PTPVNIIGRNLLTQIGCTLNF  
>75054\_6 0.3  
PQITLWQRPLVTIKIGGQLKEALLDTGADDTVLEEINLPGRWKPKMIGGIGGFIKVRQYDQITIDICGHKAIGTVLVG  
PTPVNIIGRNLLTQIGCTLNF  
>75054\_8 0.3  
PQITLWQRPIVTIKIGGQLKEALLDTGADDTVLEEMNLPGRWKPKMIGGIGGFIKVRQYDQITIEICGHKAIGTVLVG  
PTPVNIIGRNLLTQIGCTLNF  
>75054\_10 0.3  
PQITLWQRPIVTIKIGGQLKEALLDTGADDTVLEEMNLPGRWKPKMIGGIGGFIKVRQYDQITIDICGHKAIGTVLVG  
PTPVNIIGRNLLTQIGCTLNF  
>75054\_12 0.3  
PQITLWQRPIVTIKIGGQLKEALLDTGADDTVLEEINLPGRWKPKMIGGIGGFIKVRQYDQITIEICGHKAIGTVLVG  
PTPVNIIGRNLLTQIGCTLNF  
>75054\_14 0.3  
PQITLWQRPIVTIKIGGQLKEALLDTGADDTVLEEINLPGRWKPKMIGGIGGFIKVRQYDQITIDICGHKAIGTVLVG  
PTPVNIIGRNLLTQIGCTLNF  
>75114\_0 0.3  
PQITLWQRPLVTIKIGGQLKEALLDTGADDTVLEEDMDLPGRWKPKMIGGIGGFIKVRQYDQISIEICGHKAIGTVLVG  
PTPNIIGRNLLTQIGCTLNF  
>148111\_0 0.2  
PQITLWQRPLVTVKIGGQLKEALLDTGADDTVLEEMNLPGRWKPRMIGGIGGFIKVRQYDQISMEICGHKAIGTVLIG  
PTPVNIIGRNLLTQIGCTLNF  
>148111\_1 0.2  
PQITLWQRPLVTVKIGGQLKEALLDTGADDTVLEEMNLPGRWKPRMIGGIGGFIKVRQYDQVSMEICGHKAIGTVLIG  
PTPVNIIGRNLLTQIGCTLNF  
>9706\_0 0.3  
PQITLWQRPLVTIKIGGQLKEALLDTGADDTVLEEDMDLPGRWKPKMIGGIGGFIKVRQYDQILIEICGHKAIGTVLVG  
PTPVNIIGRNLLTQIGCTLNF  
>187173\_0 0.2  
PQITLWQRPLVTVKIGGQLKEALLDTGADDTVLEDINLPGKWKPKMIGGIGGFIKVRQYDQILIEICGKKAIGTVLVG  
PTPVNIIGRNMLTQIGCTLNF  
>187173\_1 0.2  
PQITLWQRPLVTVKIGGQLKEALLDTGADDTVLEDINLPGKWKPKMIGGIGGFIKVRQYDQILIEICGKKAIGTVLIG  
PTPVNIIGRNMLTQIGCTLNF  
>187173\_2 0.2  
PQITLWQRPLVTVKIGGQLKEALLDTGADDTVLEDINLPGNWKPKMIGGIGGFIKVRQYDQILIEICGKKAIGTVLVG  
PTPVNIIGRNMLTQIGCTLNF  
>187173\_3 0.2  
PQITLWQRPLVTVKIGGQLKEALLDTGADDTVLEDINLPGNWKPKMIGGIGGFIKVRQYDQILIEICGKKAIGTVLIG  
PTPVNIIGRNMLTQIGCTLNF  
>187173\_4 0.2  
PQITLWQRPLVTVKIGGQLTEALLDTGADDTVLEDINLPGKWKPKMIGGIGGFIKVRQYDQILIEICGKKAIGTVLVG  
PTPVNIIGRNMLTQIGCTLNF  
>187173\_5 0.2  
PQITLWQRPLVTVKIGGQLTEALLDTGADDTVLEDINLPGKWKPKMIGGIGGFIKVRQYDQILIEICGKKAIGTVLIG  
PTPVNIIGRNMLTQIGCTLNF  
>187173\_6 0.2  
PQITLWQRPLVTVKIGGQLTEALLDTGADDTVLEDINLPGNWKPKMIGGIGGFIKVRQYDQILIEICGKKAIGTVLVG  
PTPVNIIGRNMLTQIGCTLNF  
>187173\_7 0.2  
PQITLWQRPLVTVKIGGQLTEALLDTGADDTVLEDINLPGNWKPKMIGGIGGFIKVRQYDQILIEICGKKAIGTVLIG  
PTPVNIIGRNMLTQIGCTLNF  
>187173\_8 0.2  
PQITLWQRPLVTVRIGGQLKEALLDTGADDTVLEDINLPGKWKPKMIGGIGGFIKVRQYDQILIEICGKKAIGTVLVG  
PTPVNIIGRNMLTQIGCTLNF  
>187173\_9 0.2  
PQITLWQRPLVTVRIGGQLKEALLDTGADDTVLEDINLPGNWKPKMIGGIGGFIKVRQYDQILIEICGKKAIGTVLIG  
PTPVNIIGRNMLTQIGCTLNF  
>187173\_10 0.2  
PQITLWQRPLVTVRIGGQLKEALLDTGADDTVLEDINLPGNWKPKMIGGIGGFIKVRQYDQILIEICGKKAIGTVLVG  
PTPVNIIGRNMLTQIGCTLNF  
>187173\_11 0.2

PQITLWQRPLVTVRIGGQLKEALLDTGADDTVLEDINLPGNWKPKMIGGIGGFIKVRQYDQILIEICGKKAIGTVLIG  
PTPVNIIGRNMLTQIGCTLNF  
>187173\_12 0.2  
PQITLWQRPLVTVRIGGQLTEALLDTGADDTVLEDINLPGKWKPKMIGGIGGFIKVRQYDQILIEICGKKAIGTVLVG  
PTPVNIIGRNMLTQIGCTLNF  
>187173\_13 0.2  
PQITLWQRPLVTVRIGGQLTEALLDTGADDTVLEDINLPGKWKPKMIGGIGGFIKVRQYDQILIEICGKKAIGTVLIG  
PTPVNIIGRNMLTQIGCTLNF  
>187173\_14 0.2  
PQITLWQRPLVTVRIGGQLTEALLDTGADDTVLEDINLPGNWKPKMIGGIGGFIKVRQYDQILIEICGKKAIGTVLVG  
PTPVNIIGRNMLTQIGCTLNF  
>187173\_15 0.2  
PQITLWQRPLVTVRIGGQLTEALLDTGADDTVLEDINLPGNWKPKMIGGIGGFIKVRQYDQILIEICGKKAIGTVLIG  
PTPVNIIGRNMLTQIGCTLNF  
>187173\_16 0.2  
PQITLWQRPIVTVKIGGQLKEALLDTGADDTVLEDINLPGKWKPKMIGGIGGFIKVRQYDQILIEICGKKAIGTVLVG  
PTPVNIIGRNMLTQIGCTLNF  
>187173\_17 0.2  
PQITLWQRPIVTVKIGGQLKEALLDTGADDTVLEDINLPGKWKPKMIGGIGGFIKVRQYDQILIEICGKKAIGTVLIG  
PTPVNIIGRNMLTQIGCTLNF  
>187173\_18 0.2  
PQITLWQRPIVTVKIGGQLKEALLDTGADDTVLEDINLPGNWKPKMIGGIGGFIKVRQYDQILIEICGKKAIGTVLVG  
PTPVNIIGRNMLTQIGCTLNF  
>187173\_19 0.2  
PQITLWQRPIVTVKIGGQLKEALLDTGADDTVLEDINLPGNWKPKMIGGIGGFIKVRQYDQILIEICGKKAIGTVLIG  
PTPVNIIGRNMLTQIGCTLNF  
>187173\_20 0.2  
PQITLWQRPIVTVKIGGQLTEALLDTGADDTVLEDINLPGKWKPKMIGGIGGFIKVRQYDQILIEICGKKAIGTVLVG  
PTPVNIIGRNMLTQIGCTLNF  
>187173\_21 0.2  
PQITLWQRPIVTVKIGGQLTEALLDTGADDTVLEDINLPGKWKPKMIGGIGGFIKVRQYDQILIEICGKKAIGTVLIG  
PTPVNIIGRNMLTQIGCTLNF  
>187173\_22 0.2  
PQITLWQRPIVTVKIGGQLTEALLDTGADDTVLEDINLPGNWKPKMIGGIGGFIKVRQYDQILIEICGKKAIGTVLVG  
PTPVNIIGRNMLTQIGCTLNF  
>187173\_23 0.2  
PQITLWQRPIVTVKIGGQLTEALLDTGADDTVLEDINLPGNWKPKMIGGIGGFIKVRQYDQILIEICGKKAIGTVLIG  
PTPVNIIGRNMLTQIGCTLNF  
>187173\_24 0.2  
PQITLWQRPIVTVRIGGQLKEALLDTGADDTVLEDINLPGKWKPKMIGGIGGFIKVRQYDQILIEICGKKAIGTVLVG  
PTPVNIIGRNMLTQIGCTLNF  
>187173\_25 0.2  
PQITLWQRPIVTVRIGGQLKEALLDTGADDTVLEDINLPGKWKPKMIGGIGGFIKVRQYDQILIEICGKKAIGTVLIG  
PTPVNIIGRNMLTQIGCTLNF  
>187173\_26 0.2  
PQITLWQRPIVTVRIGGQLKEALLDTGADDTVLEDINLPGNWKPKMIGGIGGFIKVRQYDQILIEICGKKAIGTVLVG  
PTPVNIIGRNMLTQIGCTLNF  
>187173\_27 0.2  
PQITLWQRPIVTVRIGGQLKEALLDTGADDTVLEDINLPGNWKPKMIGGIGGFIKVRQYDQILIEICGKKAIGTVLIG  
PTPVNIIGRNMLTQIGCTLNF  
>187173\_28 0.2  
PQITLWQRPIVTVRIGGQLTEALLDTGADDTVLEDINLPGKWKPKMIGGIGGFIKVRQYDQILIEICGKKAIGTVLVG  
PTPVNIIGRNMLTQIGCTLNF  
>187173\_29 0.2  
PQITLWQRPIVTVRIGGQLTEALLDTGADDTVLEDINLPGKWKPKMIGGIGGFIKVRQYDQILIEICGKKAIGTVLIG  
PTPVNIIGRNMLTQIGCTLNF  
>187173\_30 0.2  
PQITLWQRPIVTVRIGGQLTEALLDTGADDTVLEDINLPGNWKPKMIGGIGGFIKVRQYDQILIEICGKKAIGTVLVG  
PTPVNIIGRNMLTQIGCTLNF  
>187173\_31 0.2  
PQITLWQRPIVTVRIGGQLTEALLDTGADDTVLEDINLPGNWKPKMIGGIGGFIKVRQYDQILIEICGKKAIGTVLIG  
PTPVNIIGRNMLTQIGCTLNF

## Sequences for the NFV-resistant ensemble

>107985\_112 600.0  
PQITLWQRPLVAVKIGGQIIEALLDTGADNTVLENIELPGRWKPKMIGGIGGFIKVRQYEEIPIEICGHKVTGTVLVG  
PTPVNIIGRDLMTQIGCTLNF

>107985\_217 600.0  
PQITLWQRPLIAIKIGGQIIEALLDTGADNTVLENIELPGRWKPKMIGGIGGLIKVRQYEEIPIEICGHKVTGTVLVG  
PTPVDIIGRDLMTQIGCTLNF

>107985\_219 600.0  
PQITLWQRPLIAIKIGGQIIEALLDTGADNTVLENIELPGRWKPKMIGGIGGLIKVREYEEIPIEICGHKVTGTVLVG  
PTPVDIIGRDLMTQIGCTLNF

>107985\_220 600.0  
PQITLWQRPLIAIKIGGQIIEALLDTGADNTVLENIELPGRWKPKMIGGIGGLVKVRQYEEIPIEICGHKVTGTVLVG  
PTPVNIIGRDLMTQIGCTLNF

>107985\_221 600.0  
PQITLWQRPLIAIKIGGQIIEALLDTGADNTVLENIELPGRWKPKMIGGIGGLVKVRQYEEIPIEICGHKVTGTVLVG  
PTPVDIIGRDLMTQIGCTLNF

>107985\_222 600.0  
PQITLWQRPLIAIKIGGQIIEALLDTGADNTVLENIELPGRWKPKMIGGIGGLVKVREYEEIPIEICGHKVTGTVLVG  
PTPVNIIGRDLMTQIGCTLNF

>107985\_223 600.0  
PQITLWQRPLIAIKIGGQIIEALLDTGADNTVLENIELPGRWKPKMIGGIGGLVKVREYEEIPIEICGHKVTGTVLVG  
PTPVDIIGRDLMTQIGCTLNF

>107985\_224 600.0  
PQITLWQRPLIAIKIGGQIIEALLDTGADNTVLENIELPGRWKPKMIGGIGGFIKVRQYEEIPIEICGHKVTGTVLVG  
PTPVNIIGRDLMTQIGCTLNF

>107985\_225 600.0  
PQITLWQRPLIAIKIGGQIIEALLDTGADNTVLENIELPGRWKPKMIGGIGGFIKVRQYEEIPIEICGHKVTGTVLVG  
PTPVDIIGRDLMTQIGCTLNF

>107985\_226 600.0  
PQITLWQRPLIAIKIGGQIIEALLDTGADNTVLENIELPGRWKPKMIGGIGGFIKVRQYEEIPIEICGHKVTGTVLVG  
PTPVNIIGRDLMTQIGCTLNF

>107985\_227 600.0  
PQITLWQRPLIAIKIGGQIIEALLDTGADNTVLENIELPGRWKPKMIGGIGGFIKVRQYEEIPIEICGHKVTGTVLVG  
PTPVDIIGRDLMTQIGCTLNF

>107985\_228 600.0  
PQITLWQRPLIAIKIGGQIIEALLDTGADNTVLENIELPGRWKPKMIGGIGGFVKVRQYEEIPIEICGHKVTGTVLVG  
PTPVNIIGRDLMTQIGCTLNF

>107985\_229 600.0  
PQITLWQRPLIAIKIGGQIIEALLDTGADNTVLENIELPGRWKPKMIGGIGGFVKVRQYEEIPIEICGHKVTGTVLVG  
PTPVDIIGRDLMTQIGCTLNF

>107985\_230 600.0  
PQITLWQRPLIAIKIGGQIIEALLDTGADNTVLENIELPGRWKPKMIGGIGGFVKVREYEEIPIEICGHKVTGTVLVG  
PTPVNIIGRDLMTQIGCTLNF

>107985\_231 600.0  
PQITLWQRPLIAIKIGGQIIEALLDTGADNTVLENIELPGRWKPKMIGGIGGFVKVREYEEIPIEICGHKVTGTVLVG  
PTPVDIIGRDLMTQIGCTLNF

>107985\_232 600.0  
PQITLWQRPLIAIKIGGQIIEALLDTGADNTVLENIELPGRWKPKMIGGIGGLIKVRQYEEIPIEICGHKVTGTVLVG  
PTPVNIIGRDLMTQIGCTLNF

>107985\_233 600.0  
PQITLWQRPLIAIKIGGQIIEALLDTGADNTVLENIELPGRWKPKMIGGIGGLIKVRQYEEIPIEICGHKVTGTVLVG  
PTPVDIIGRDLMTQIGCTLNF

>107985\_234 600.0  
PQITLWQRPLIAIKIGGQIIEALLDTGADNTVLENIELPGRWKPKMIGGIGGLIKVREYEEIPIEICGHKVTGTVLVG  
PTPVNIIGRDLMTQIGCTLNF

>107985\_235 600.0  
PQITLWQRPLIAIKIGGQIIEALLDTGADNTVLENIELPGRWKPKMIGGIGGLIKVREYEEIPIEICGHKVTGTVLVG  
PTPVDIIGRDLMTQIGCTLNF

>107985\_236 600.0  
PQITLWQRPLIAIKIGGQIIEALLDTGADNTVLENIELPGRWKPKMIGGIGGLVKVRQYEEIPIEICGHKVTGTVLVG  
PTPVNIIGRDLMTQIGCTLNF

>107985\_237 600.0  
PQITLWQRPLIAIKIGGQIIEALLDTGADNTVLENIELPGRWKPKMIGGIGGLVKVRQYEEIPIEICGHKVTGTVLVG

PTPVDIIGRDLMTQIGCTLNF  
>107985\_238 600.0  
PQITLWQRPLIAVKIGGQIEALLDTGADNTVLENIDLPGRWKPKMIGGIGGLVKVREYEEIPIEICGHKVTGTVLVG  
PTPVNIIIGRDLMTQIGCTLNF  
>107985\_239 600.0  
PQITLWQRPLIAVKIGGQIEALLDTGADNTVLENIDLPGRWKPKMIGGIGGLVKVREYEEIPIEICGHKVTGTVLVG  
PTPVDIIGRDLMTQIGCTLNF  
>107985\_240 600.0  
PQITLWQRPLIAVKIGGQIEALLDTGADNTVLENIELPGRWKPKMIGGIGGFVKVRQYEEIPIEICGHKVTGTVLVG  
PTPVNIIIGRDLMTQIGCTLNF  
>107985\_241 600.0  
PQITLWQRPLIAVKIGGQIEALLDTGADNTVLENIELPGRWKPKMIGGIGGFVKVRQYEEIPIEICGHKVTGTVLVG  
PTPVDIIGRDLMTQIGCTLNF  
>107985\_242 600.0  
PQITLWQRPLIAVKIGGQIEALLDTGADNTVLENIELPGRWKPKMIGGIGGFVKVRQYEEIPIEICGHKVTGTVLVG  
PTPVNIIIGRDLMTQIGCTLNF  
>107985\_243 600.0  
PQITLWQRPLIAVKIGGQIEALLDTGADNTVLENIELPGRWKPKMIGGIGGFVKVRQYEEIPIEICGHKVTGTVLVG  
PTPVDIIGRDLMTQIGCTLNF  
>107985\_244 600.0  
PQITLWQRPLIAVKIGGQIEALLDTGADNTVLENIELPGRWKPKMIGGIGGFVKVRQYEEIPIEICGHKVTGTVLVG  
PTPVNIIIGRDLMTQIGCTLNF  
>107985\_245 600.0  
PQITLWQRPLIAVKIGGQIEALLDTGADNTVLENIELPGRWKPKMIGGIGGFVKVRQYEEIPIEICGHKVTGTVLVG  
PTPVDIIGRDLMTQIGCTLNF  
>107985\_246 600.0  
PQITLWQRPLIAVKIGGQIEALLDTGADNTVLENIELPGRWKPKMIGGIGGFVKVRQYEEIPIEICGHKVTGTVLVG  
PTPVNIIIGRDLMTQIGCTLNF  
>107985\_247 600.0  
PQITLWQRPLIAVKIGGQIEALLDTGADNTVLENIELPGRWKPKMIGGIGGFVKVRQYEEIPIEICGHKVTGTVLVG  
PTPVDIIGRDLMTQIGCTLNF  
>107985\_248 600.0  
PQITLWQRPLIAVKIGGQIEALLDTGADNTVLENIELPGRWKPKMIGGIGGLIKVRQYEEIPIEICGHKVTGTVLVG  
PTPVNIIIGRDLMTQIGCTLNF  
>107985\_249 600.0  
PQITLWQRPLIAVKIGGQIEALLDTGADNTVLENIELPGRWKPKMIGGIGGLIKVRQYEEIPIEICGHKVTGTVLVG  
PTPVDIIGRDLMTQIGCTLNF  
>107985\_250 600.0  
PQITLWQRPLIAVKIGGQIEALLDTGADNTVLENIELPGRWKPKMIGGIGGLIKVRQYEEIPIEICGHKVTGTVLVG  
PTPVNIIIGRDLMTQIGCTLNF  
>107985\_251 600.0  
PQITLWQRPLIAVKIGGQIEALLDTGADNTVLENIELPGRWKPKMIGGIGGLIKVRQYEEIPIEICGHKVTGTVLVG  
PTPVDIIGRDLMTQIGCTLNF  
>107985\_252 600.0  
PQITLWQRPLIAVKIGGQIEALLDTGADNTVLENIELPGRWKPKMIGGIGGLVKVRQYEEIPIEICGHKVTGTVLVG  
PTPVNIIIGRDLMTQIGCTLNF  
>107985\_253 600.0  
PQITLWQRPLIAVKIGGQIEALLDTGADNTVLENIELPGRWKPKMIGGIGGLVKVRQYEEIPIEICGHKVTGTVLVG  
PTPVDIIGRDLMTQIGCTLNF  
>107985\_254 600.0  
PQITLWQRPLIAVKIGGQIEALLDTGADNTVLENIELPGRWKPKMIGGIGGLVKVREYEEIPIEICGHKVTGTVLVG  
PTPVNIIIGRDLMTQIGCTLNF  
>107985\_255 600.0  
PQITLWQRPLIAVKIGGQIEALLDTGADNTVLENIELPGRWKPKMIGGIGGLVKVREYEEIPIEICGHKVTGTVLVG  
PTPVDIIGRDLMTQIGCTLNF  
>123049\_0 600.0  
PQITLWQRPIITIKIGGQLKDVLMMDTGADDTVLEDIDLPGRWPKLIGGIGGFVKVRQYDHPVVEVCCHKVTTTTVLVG  
PTPVDVIGRNLLTQIGCTLNF  
>123049\_1 600.0  
PQITLWQRPIITIKIGGQLKDVLMMDTGADDTVLEDIDLPGRWPKLIGGIGGFVKVRQYDNPVVEVCCHKVTTTTVLVG  
PTPVDVIGRNLLTQIGCTLNF  
>123049\_2 600.0  
PQITLWQRPIITIKIGGQLKDVLMMDTGADDTVLEDIDLPGRWPKLIGGIGGFVKVRQYDHPVVEVCCHKVTTTTVLVG

PTPVDVIGRNLLTQIGCTLNF  
>123049\_3 600.0  
PQITLWQRPIITIKIGGQLKDVLMMDTGADDTVLEDIDLPGRWKPKLIGGIGGFVKVKQYDNPVEVCGHKVTTTVLVG  
PTPVDVIGRNLLTQIGCTLNF  
>123049\_4 600.0  
PQITLWQRPIITIKIGGQLKDVLMMDTGADDTVLEDIDLPGKWKPKLIGGIGGFVKVRQYDHPVEVCGHKVTTTVLVG  
PTPVDVIGRNLLTQIGCTLNF  
>123049\_5 600.0  
PQITLWQRPIITIKIGGQLKDVLMMDTGADDTVLEDIDLPGKWKPKLIGGIGGFVKVRQYDNPVEVCGHKVTTTVLVG  
PTPVDVIGRNLLTQIGCTLNF  
>123049\_6 600.0  
PQITLWQRPIITIKIGGQLKDVLMMDTGADDTVLEDIDLPGKWKPKLIGGIGGFVKVKQYDHPVEVCGHKVTTTVLVG  
PTPVDVIGRNLLTQIGCTLNF  
>123049\_7 600.0  
PQITLWQRPIITIKIGGQLKDVLMMDTGADDTVLEDIDLPGKWKPKLIGGIGGFVKVKQYDNPVEVCGHKVTTTVLVG  
PTPVDVIGRNLLTQIGCTLNF  
>123049\_8 600.0  
PQITLWQRPIITIKIGGQLKDVLMMDTGADDTVLENIDLPGRWKPKLIGGIGGFVKVRQYDHPVEVCGHKVTTTVLVG  
PTPVDVIGRNLLTQIGCTLNF  
>123049\_9 600.0  
PQITLWQRPIITIKIGGQLKDVLMMDTGADDTVLENIDLPGRWKPKLIGGIGGFVKVRQYDNPVEVCGHKVTTTVLVG  
PTPVDVIGRNLLTQIGCTLNF  
>123049\_10 600.0  
PQITLWQRPIITIKIGGQLKDVLMMDTGADDTVLENIDLPGRWKPKLIGGIGGFVKVKQYDHPVEVCGHKVTTTVLVG  
PTPVDVIGRNLLTQIGCTLNF  
>123049\_11 600.0  
PQITLWQRPIITIKIGGQLKDVLMMDTGADDTVLENIDLPGRWKPKLIGGIGGFVKVKQYDNPVEVCGHKVTTTVLVG  
PTPVDVIGRNLLTQIGCTLNF  
>123049\_12 600.0  
PQITLWQRPIITIKIGGQLKDVLMMDTGADDTVLENIDLPGKWKPKLIGGIGGFVKVRQYDHPVEVCGHKVTTTVLVG  
PTPVDVIGRNLLTQIGCTLNF  
>123049\_13 600.0  
PQITLWQRPIITIKIGGQLKDVLMMDTGADDTVLENIDLPGKWKPKLIGGIGGFVKVRQYDNPVEVCGHKVTTTVLVG  
PTPVDVIGRNLLTQIGCTLNF  
>123049\_14 600.0  
PQITLWQRPIITIKIGGQLKDVLMMDTGADDTVLENIDLPGKWKPKLIGGIGGFVKVKQYDHPVEVCGHKVTTTVLVG  
PTPVDVIGRNLLTQIGCTLNF  
>123049\_15 600.0  
PQITLWQRPIITIKIGGQLKDVLMMDTGADDTVLENIDLPGKWKPKLIGGIGGFVKVKQYDNPVEVCGHKVTTTVLVG  
PTPVDVIGRNLLTQIGCTLNF  
>98601\_0 600.0  
PQITLWQRPFVTIKIGGQLIEALLDTGADDTVLEEMNLPGRWKPKIIGGIGGFVKVRQYDQPIEICGHKVITTVLIG  
PTPVNAIGRNLLTQIGCTLNF  
>147975\_1 600.0  
PQITLWQRPIITIKIGGQLKDVLMMDTGADDTVLEGIDLPGRWKPKMIGGIGGFVKVRQYDQPIEICGHKVLSTVLV  
PTPVNVIGRNLMTQIGCTLNF  
>143332\_24 600.0  
PQITLWQRPIVTVKIGGHLVEVLLDTGADDTVLEEINLPGRWKPKMIGGIGGFVKVKQYDQVPIEIWGHKVLSTVLV  
PTPVNVIGRNLMTQIGCTLNF  
>143332\_25 600.0  
PQITLWQRPIVTVKIGGHLVEVLLDTGADDTVLEEINLPGRWKPKMIGGIGGFVKVKQYDQVPIEIWGHKVLSTVLV  
PTPVNVVGRNLMTQIGCTLNF  
>143332\_81 600.0  
PQITLWQRPIVTVKIGGHLVEVLLDTGADDTVIEEINLPGRWKPKMIGGIGGFVKVKQYDQVPIEIWGHKVLSTVLV  
PTPVNVVGRNLMTQIGCTLNF  
>143332\_82 600.0  
PQITLWQRPIVTVKIGGHLVEVLLDTGADDTVIEEINLPGRWKPKMIGGIGGFVVRVKQYDQVPIEIWGHKVLSTVLV  
PTPVNVIGRNLMTQIGCTLNF  
>143332\_83 600.0  
PQITLWQRPIVTVKIGGHLVEVLLDTGADDTVIEEINLPGRWKPKMIGGIGGFVVRVKQYDQVPIEIWGHKVLSTVLV  
PTPVNVVGRNLMTQIGCTLNF  
>143332\_84 600.0  
PQITLWQRPIVTVKIGGHLVEVLLDTGADDTVIEEINLPGRWKPKIIGGIGGFVKVKQYDQVPIEIWGHKVLSTVLV

PTPVNVIGRNLMTQIGCTLNF  
>143332\_85 600.0  
PQITLWQRPIVTVKVGHLVEVLLDTGADDTVIEEINLPGRWPKKIIGGIGGFVKVKQYDQVPIEIWGHKVLSTVLVG  
PTPVNVVGRNLMTQIGCTLNF  
>143332\_86 600.0  
PQITLWQRPIVTVKVGHLVEVLLDTGADDTVIEEINLPGRWPKKIIGGIGGFVRVKQYDQVPIEIWGHKVLSTVLVG  
PTPVNVIGRNLMTQIGCTLNF  
>143332\_87 600.0  
PQITLWQRPIVTVKVGHLVEVLLDTGADDTVIEEINLPGRWPKKIIGGIGGFVRVKQYDQVPIEIWGHKVLSTVLVG  
PTPVNVVGRNLMTQIGCTLNF  
>143332\_88 600.0  
PQITLWQRPIVTVKVGHLVEVLLDTGADDTVVEEINLPGRWPKMIGGIGGFVKVKQYDQVPIEIWGHKVLSTVLVG  
PTPVNVIGRNLMTQIGCTLNF  
>143332\_89 600.0  
PQITLWQRPIVTVKVGHLVEVLLDTGADDTVVEEINLPGRWPKMIGGIGGFVKVKQYDQVPIEIWGHKVLSTVLVG  
PTPVNVVGRNLMTQIGCTLNF  
>143332\_90 600.0  
PQITLWQRPIVTVKVGHLVEVLLDTGADDTVVEEINLPGRWPKMIGGIGGFVRVKQYDQVPIEIWGHKVLSTVLVG  
PTPVNVIGRNLMTQIGCTLNF  
>143332\_91 600.0  
PQITLWQRPIVTVKVGHLVEVLLDTGADDTVVEEINLPGRWPKMIGGIGGFVRVKQYDQVPIEIWGHKVLSTVLVG  
PTPVNVVGRNLMTQIGCTLNF  
>143332\_92 600.0  
PQITLWQRPIVTVKVGHLVEVLLDTGADDTVVEEINLPGRWPKKIIGGIGGFVKVKQYDQVPIEIWGHKVLSTVLVG  
PTPVNVIGRNLMTQIGCTLNF  
>143332\_93 600.0  
PQITLWQRPIVTVKVGHLVEVLLDTGADDTVVEEINLPGRWPKKIIGGIGGFVKVKQYDQVPIEIWGHKVLSTVLVG  
PTPVNVVGRNLMTQIGCTLNF  
>143332\_94 600.0  
PQITLWQRPIVTVKVGHLVEVLLDTGADDTVVEEINLPGRWPKKIIGGIGGFVRVKQYDQVPIEIWGHKVLSTVLVG  
PTPVNVIGRNLMTQIGCTLNF  
>143332\_95 600.0  
PQITLWQRPIVTVKVGHLVEVLLDTGADDTVVEEINLPGRWPKKIIGGIGGFVRVKQYDQVPIEIWGHKVLSTVLVG  
PTPVNVVGRNLMTQIGCTLNF  
>103057\_0 600.0  
PQITLWQRPIVTVKIGGQLREALLDTGADDTVFEDELGRWTPKIIGGIGGFVKVKQYEEVPIEICEHKTATVLVG  
PTPFNIIGRNLMTQLGCTLNF  
>103057\_2 600.0  
PQITLWQRPIVTVKIGGQLREALLDTGADDTVFEDELGRWTPKIIGGIGGFVKVKQYEEVPVEICEHKTATVLVG  
PTPFNIIGRNLMTQLGCTLNF  
>56150\_0 600.0  
PQITLWRRPVVTIKVGGQLTEALLDTGADDTVFEDELGRWTPKMIMIGGLVKVRQYDQVPIEFCGHKVLSTVLVG  
PTPANIIGRNLMTQIGCTLNF  
>56150\_1 600.0  
PQITLWRRPVVTIKVGGQLTEALLDTGADDTVFEDELGRWTPKMIMIGGLVKVRQYDQVPIEFCGRKVLSTVLVG  
PTPANIIGRNLMTQIGCTLNF  
>56150\_2 600.0  
PQITLWRRPVVTIKVGGQLTEALLDTGADDTVFEDELGRWTPKMIMIGGLVKVKQYDQVPIEFCGHKVLSTVLVG  
PTPANIIGRNLMTQIGCTLNF  
>56150\_3 600.0  
PQITLWRRPVVTIKVGGQLTEALLDTGADDTVFEDELGRWTPKMIMIGGLVKVKQYDQVPIEFCGRKVLSTVLVG  
PTPANIIGRNLMTQIGCTLNF  
>143473\_16 600.0  
PQITLWQRPIVIVKIGGQLREALLDTGADDTVFEDELGRWTPKLIGGIGGFVKVRQYDQVPIEICGHKIISTVLVG  
PTPANIIGRNLMTQLGCTLNF  
>143473\_18 600.0  
PQITLWQRPIVIVKIGGQLREALLDTGADDTVFEDELGRWTPKLIGGIGGFVKVRQYDQVPIEICGHKVISTVLVG  
PTPANIIGRNLMTQLGCTLNF  
>143473\_20 600.0  
PQITLWQRPIVIVKIGGQLREALLDTGADDTVFEDELGRWTPKLIGGIGGFVRVRQYDQVPIEICGHKIISTVLVG  
PTPANIIGRNLMTQLGCTLNF  
>143473\_22 600.0  
PQITLWQRPIVIVKIGGQLREALLDTGADDTVFEDELGRWTPKLIGGIGGFVRVRQYDQVPIEICGHKVISTVLVG



PTPANIIGRNLMTQLGCTLNF  
>143473\_24 600.0  
PQITLWQRPIVIVKIGGQIREALLDTGADDTVFEDIDLPGRWTPKLIGGIGGFVKVRQYDQVPIEICGHKIISTVLVG  
PTPANIIGRNLMTQLGCTLNF  
>143473\_26 600.0  
PQITLWQRPIVIVKIGGQIREALLDTGADDTVFEDIDLPGRWTPKLIGGIGGFVKVRQYDQVPIEICGHKVISTVLVG  
PTPANIIGRNLMTQLGCTLNF  
>143473\_28 600.0  
PQITLWQRPIVIVKIGGQIREALLDTGADDTVFEDIDLPGRWTPKLIGGIGGFVVRQYDQVPIEICGHKIISTVLVG  
PTPANIIGRNLMTQLGCTLNF  
>143473\_30 600.0  
PQITLWQRPIVIVKIGGQIREALLDTGADDTVFEDIDLPGRWTPKLIGGIGGFVVRQYDQVPIEICGHKVISTVLVG  
PTPANIIGRNLMTQLGCTLNF  
>148053\_0 600.0  
PQITLWQRPIVTVKIEGQLREALLDTGADNTVFEDITLPGRWKPRMIGGIGGFVKVKEYDQITIDICGHKAVGTVLVG  
PTPANIIGRDLLTQIGCTLNF  
>148053\_1 600.0  
PQITLWQRPIVTVKIEGQLREALLDTGADNTVFEDITLPGRWKPRMIGGIGGFVKVKEYDQVTIDICGHKAVGTVLVG  
PTPANIIGRDLLTQIGCTLNF  
>148053\_2 600.0  
PQITLWQRPVTVKIEGQLREALLDTGADNTVFEDITLPGRWKPRMIGGIGGFVKVKEYDQITIDICGHKAVGTVLVG  
PTPANIIGRDLLTQIGCTLNF  
>5279\_0 600.0  
PQITLWQRPLVTVKIGGQLREALLDTGADNTVLEDISLPGRWKPKMIGGIGGFVKVKEYDQVPIEICGHKTIGTVLVG  
PTPVNIIGRDLMTQIGCTLNF  
>41212\_0 600.0  
PQITLWQRPLVTVKIGGQLKEALLDTGADNTVIEDINLPGRWKPKLIGGIGGFVKVKQYDQIPIEICGHKTIGTVLVG  
PTPVNIIGRDLMTQIGCTLNF  
>41212\_1 600.0  
PQITLWQRPLVTVKIGGQLKEALLDTGADNTVIEDINLPGRWNPKLIGGIGGFVKVKQYDQIPIEICGHKTIGTVLVG  
PTPVNIIGRDLMTQIGCTLNF  
>41212\_2 600.0  
PQITLWQRPLVTVKIGGQLKEALLDTGADNTVIEDINFPGRWKPKLIGGIGGFVKVKQYDQIPIEICGHKTIGTVLVG  
PTPVNIIGRDLMTQIGCTLNF  
>41212\_3 600.0  
PQITLWQRPLVTVKIGGQLKEALLDTGADNTVIEDINFPGRWNPKLIGGIGGFVKVKQYDQIPIEICGHKTIGTVLVG  
PTPVNIIGRDLMTQIGCTLNF  
>41212\_8 600.0  
PQITLWQRPLVTVKIGGQLKEALLDTGADNTVMEDINLPGRWKPKLIGGIGGFVKVKQYDQIPIEICGHKTIGTVLVG  
PTPVNIIGRDLMTQIGCTLNF  
>41212\_9 600.0  
PQITLWQRPLVTVKIGGQLKEALLDTGADNTVMEDINLPGRWNPKLIGGIGGFVKVKQYDQIPIEICGHKTIGTVLVG  
PTPVNIIGRDLMTQIGCTLNF  
>41212\_10 600.0  
PQITLWQRPLVTVKIGGQLKEALLDTGADNTVMEDINFPGRWKPKLIGGIGGFVKVKQYDQIPIEICGHKTIGTVLVG  
PTPVNIIGRDLMTQIGCTLNF  
>41212\_11 600.0  
PQITLWQRPLVTVKIGGQLKEALLDTGADNTVMEDINFPGRWNPKLIGGIGGFVKVKQYDQIPIEICGHKTIGTVLVG  
PTPVNIIGRDLMTQIGCTLNF

**Sequences for the NFV-susceptible ensemble**

>81921\_0 0.4  
PQITLWQRPLVAIKIEGQLKEALLDTGADDTVLEEMNLPGRWKPKMIGGIGGFVKVRQYDQILIEICGHKAIGTVLVG  
PTPVNIIGRNLLTQIGCTLNF  
>81921\_1 0.4  
PQITLWQRPLVAIKIEGQLKEALLDTGADDTVLEEMNLPGRWKPKMIGGIGGFVKVRQYDQILIEICGHKAIGTVLVG  
PTPVNIIGRNLLTQIGCTLNF  
>81921\_2 0.4  
PQITLWQRPLVAIKVEGQLKEALLDTGADDTVLEEMNLPGRWKPKMIGGIGGFVKVRQYDQILIEICGHKAIGTVLVG  
PTPVNIIGRNLLTQIGCTLNF  
>81921\_3 0.4  
PQITLWQRPLVAIKVEGQLKEALLDTGADDTVLEEMNLPGRWKPKMIGGIGGFVKVRQYDQILIEICGHKAIGTVLVG  
PTPVNIIGRNLLTQIGCTLNF

>81921\_4 0.4  
PQITLWQRPLVAIRIEGQLKEALLDTGADDTVLEEMNLPGRWKPKMIGGIGGFIVRQYDQILIEICGHKAIGTVLVG  
PTPVNIIGRNLLTQIGCTLNF

>81921\_5 0.4  
PQITLWQRPLVAIRIEGQLKEALLDTGADDTVLEEMNLPGRWKPKMIGGIGGFIVRQYDQILIEICGHKAIGTVLIG  
PTPVNIIGRNLLTQIGCTLNF

>81921\_6 0.4  
PQITLWQRPLVAIRVEGQLKEALLDTGADDTVLEEMNLPGRWKPKMIGGIGGFIVRQYDQILIEICGHKAIGTVLVG  
PTPVNIIGRNLLTQIGCTLNF

>81921\_7 0.4  
PQITLWQRPLVAIRVEGQLKEALLDTGADDTVLEEMNLPGRWKPKMIGGIGGFIVRQYDQILIEICGHKAIGTVLIG  
PTPVNIIGRNLLTQIGCTLNF

>81921\_8 0.4  
PQITLWQRPLVPIKIEGQLKEALLDTGADDTVLEEMNLPGRWKPKMIGGIGGFIVRQYDQILIEICGHKAIGTVLVG  
PTPVNIIGRNLLTQIGCTLNF

>81921\_9 0.4  
PQITLWQRPLVPIKIEGQLKEALLDTGADDTVLEEMNLPGRWKPKMIGGIGGFIVRQYDQILIEICGHKAIGTVLIG  
PTPVNIIGRNLLTQIGCTLNF

>81921\_10 0.4  
PQITLWQRPLVPIKIEGQLKEALLDTGADDTVLEEMNLPGRWKPKMIGGIGGFIVRQYDQILIEICGHKAIGTVLVG  
PTPVNIIGRNLLTQIGCTLNF

>81921\_11 0.4  
PQITLWQRPLVPIKVEGQLKEALLDTGADDTVLEEMNLPGRWKPKMIGGIGGFIVRQYDQILIEICGHKAIGTVLIG  
PTPVNIIGRNLLTQIGCTLNF

>81921\_12 0.4  
PQITLWQRPLVPIRIEGQLKEALLDTGADDTVLEEMNLPGRWKPKMIGGIGGFIVRQYDQILIEICGHKAIGTVLVG  
PTPVNIIGRNLLTQIGCTLNF

>81921\_13 0.4  
PQITLWQRPLVPIRIEGQLKEALLDTGADDTVLEEMNLPGRWKPKMIGGIGGFIVRQYDQILIEICGHKAIGTVLIG  
PTPVNIIGRNLLTQIGCTLNF

>81921\_14 0.4  
PQITLWQRPLVPIRVEGQLKEALLDTGADDTVLEEMNLPGRWKPKMIGGIGGFIVRQYDQILIEICGHKAIGTVLVG  
PTPVNIIGRNLLTQIGCTLNF

>81921\_15 0.4  
PQITLWQRPLVPIRVEGQLKEALLDTGADDTVLEEMNLPGRWKPKMIGGIGGFIVRQYDQILIEICGHKAIGTVLIG  
PTPVNIIGRNLLTQIGCTLNF

>206433\_10 0.5  
PQITLWQRPLVTAKIGGQLKEALLDTGADDTVLEEMSLPGRWKPKMIGGIGGFIVRQYDQILIEICGHKAIGTVLVG  
PTPVNIIGRNLLTQIGCTLNF

>61111\_0 0.4  
PQITLWQRPLVTIKIGGQTKEALLDTGADDTVLEEMNLPGRWKPKMIGGIGGFIVRQYDQIPIEICGHKATGTVLVG  
PTPVNIIGRNLLTQIGCTLNF

>61111\_1 0.4  
PQITLWQRPLVTIKIGGQTKEALLDTGADDTVLEEMNLPGRWKPKMIGGIGGFIVRQYDQIPIEICGHKATGTVLVG  
PTPVNIIGRNLLTQIGCTLNF

>44058\_2 0.2  
PQITLWQRPLVAIKIGGQLKEALLDTGADDTVLEEMNLPGRWKPKMIGGIGGFIVRQYDQITIEICGHKAIGTVLVG  
PTPVNIIGRNLLTQIGCTLNF

>44058\_3 0.2  
PQITLWQRPLVAIRIGGQLKEALLDTGADDTVLEEMNLPGRWKPKMIGGIGGFIVRQYDQITIEICGHKAIGTVLVG  
PTPVNIIGRNLLTQIGCTLNF

>45063\_0 0.5  
PQITLWQRPLVTIKIEGQLKEALLDTGADDTVLEEDMNLPGRWKPKMIGGIGGFIVRQYDQVSIIEICGHRAIGTVLVG  
PTPVNIIGRNLLTQIGCTLNF

>216605\_0 0.5  
PQITLWQRPLVSIKIGGQIKEALLDTGADDTVLEEMSLPGRWKPKMIGGIGGFIVRQYDQIAIEICGHKAIGTVLIG  
PTPVNIIGRNLLTQIGCTLNF

>109458\_0 0.4  
PQITLWQRPLVTIKIGGQLKEALLDTGADDTVLEEDIDLPGRWKPKMIGGIGGFIVRQYDQILVEICGYKAIGTVLVG  
PTPVNIIGRNLLTQIGCTLNF

>109458\_1 0.4  
PQITLWQRPLVTIKIGGQLKEALLDTGADDTVLEEDIDLPGKWKPKMIGGIGGFIVRQYDQILVEICGYKAIGTVLVG  
PTPVNIIGRNLLTQIGCTLNF

>148081\_0 0.4  
PQITLWQRPLVTIKIGGQTKEALLDTGADDTVLEEMNLP GKWKPKMIGGIGGFIKVRQYDQILIEICGHKAIGTVLVG  
PTPVNIIGRNLLTQIGCTLNF

>148081\_1 0.4  
PQITLWQRPLVTIKIGGQTKEALLDTGADDTVLEEMNLP GKWKPKMIGGIGGFIKVRQYDQILVEICGHKAIGTVLVG  
PTPVNIIGRNLLTQIGCTLNF

>148081\_2 0.4  
PQITLWQRPLVTIKVGGQTKEALLDTGADDTVLEEMNLP GKWKPKMIGGIGGFIKVRQYDQILIEICGHKAIGTVLVG  
PTPVNIIGRNLLTQIGCTLNF

>148081\_3 0.4  
PQITLWQRPLVTIKVGGQTKEALLDTGADDTVLEEMNLP GKWKPKMIGGIGGFIKVRQYDQILVEICGHKAIGTVLVG  
PTPVNIIGRNLLTQIGCTLNF

>148081\_4 0.4  
PQITLWQRPLVTIRIGGQTKEALLDTGADDTVLEEMNLP GKWKPKMIGGIGGFIKVRQYDQILIEICGHKAIGTVLVG  
PTPVNIIGRNLLTQIGCTLNF

>148081\_5 0.4  
PQITLWQRPLVTIRIGGQTKEALLDTGADDTVLEEMNLP GKWKPKMIGGIGGFIKVRQYDQILVEICGHKAIGTVLVG  
PTPVNIIGRNLLTQIGCTLNF

>148081\_6 0.4  
PQITLWQRPLVTIRVGGQTKEALLDTGADDTVLEEMNLP GKWKPKMIGGIGGFIKVRQYDQILIEICGHKAIGTVLVG  
PTPVNIIGRNLLTQIGCTLNF

>148081\_7 0.4  
PQITLWQRPLVTIRVGGQTKEALLDTGADDTVLEEMNLP GKWKPKMIGGIGGFIKVRQYDQILVEICGHKAIGTVLVG  
PTPVNIIGRNLLTQIGCTLNF

>75054\_1 0.4  
PQITLWQRPLVTIKIGGQLKEALLDTGADDTVLEEMNLP GRWKPKMIGGIGGFIKVRQYDQITIEICGHKATGTVLVG  
PTPVNIIGRNLLTQIGCTLNF

>75054\_3 0.4  
PQITLWQRPLVTIKIGGQLKEALLDTGADDTVLEEMNLP GRWKPKMIGGIGGFIKVRQYDQITIDICGHKATGTVLVG  
PTPVNIIGRNLLTQIGCTLNF

>75054\_5 0.4  
PQITLWQRPLVTIKIGGQLKEALLDTGADDTVLEEINLP GRWKPKMIGGIGGFIKVRQYDQITIEICGHKATGTVLVG  
PTPVNIIGRNLLTQIGCTLNF

>75054\_7 0.4  
PQITLWQRPLVTIKIGGQLKEALLDTGADDTVLEEINLP GRWKPKMIGGIGGFIKVRQYDQITIDICGHKATGTVLVG  
PTPVNIIGRNLLTQIGCTLNF

>75054\_9 0.4  
PQITLWQRPIVTIKIGGQLKEALLDTGADDTVLEEMNLP GRWKPKMIGGIGGFIKVRQYDQITIEICGHKATGTVLVG  
PTPVNIIGRNLLTQIGCTLNF

>75054\_11 0.4  
PQITLWQRPIVTIKIGGQLKEALLDTGADDTVLEEMNLP GRWKPKMIGGIGGFIKVRQYDQITIDICGHKATGTVLVG  
PTPVNIIGRNLLTQIGCTLNF

>75054\_13 0.4  
PQITLWQRPIVTIKIGGQLKEALLDTGADDTVLEEINLP GRWKPKMIGGIGGFIKVRQYDQITIEICGHKATGTVLVG  
PTPVNIIGRNLLTQIGCTLNF

>75054\_15 0.4  
PQITLWQRPIVTIKIGGQLKEALLDTGADDTVLEEINLP GRWKPKMIGGIGGFIKVRQYDQITIDICGHKATGTVLVG  
PTPVNIIGRNLLTQIGCTLNF

>13260\_0 0.4  
PQITLWQRPLVTIKIGGQLTEALLDTGADDTVLEEMNLP GRWKPKMIGGIGGFIKVGQYDQILIEICGHKAIGTVLVG  
PTPVNIIGRNLLTQIGCTLNF

>206433\_2 0.5  
PQITLWQRPLVTIKIGGQLKEALLDTGADDTVLEEMSLP GRWKPKMIGGIGGFIKVGQYDQILIEICGHKAIGTVLVG  
PTPVNIIGRNLLTQIGCTLNF

>206433\_3 0.5  
PQITLWQRPLVTIKIGGQLKEALLDTGADDTVLEEMSLP GRWKPKMIGGIGGFIKVGQYDQILIEICGHKAVGTVLVG  
PTPVNIIGRNLLTQIGCTLNF

>206433\_6 0.5  
PQITLWQRPLVTIKVGGQLKEALLDTGADDTVLEEMSLP GRWKPKMIGGIGGFIKVGQYDQILIEICGHKAIGTVLVG  
PTPVNIIGRNLLTQIGCTLNF

>206433\_7 0.5  
PQITLWQRPLVTIKVGGQLKEALLDTGADDTVLEEMSLP GRWKPKMIGGIGGFIKVGQYDQILIEICGHKAVGTVLVG  
PTPVNIIGRNLLTQIGCTLNF

>148029\_0 0.4  
PQITLWQRPLVTVKIGGQVKEALLDTGADDTVLEEMNLP GKWKPKMIGGIGGFIKVRQYDNILVDICGHKAEGTVLVG  
PTPVNIIGRNLLTQIGCTLNF

>148029\_1 0.4  
PQITLWQRPLVTVKIGGQVKEALLDTGADDTVLEEINLP GKWKPKMIGGIGGFIKVRQYDNILVDICGHKAEGTVLVG  
PTPVNIIGRNLLTQIGCTLNF

>81788\_0 0.5  
PQITLWQRPLVTIKIGGQLKEALLDTGADDTVLEEMELPGRWKPKMIGGIGGFVKVRQYEQILVEICGHKAIGTVLVG  
PTPANIIGRNLLTQIGCTLNF

>102774\_3 0.4  
PQITLWQRPLVTIKIGGQLKEALLDTGADDTVLEEMNLSGRWKPKMIGGLGGFIKVRQYDQIPIEICGHKAIGTVLIG  
PTPVNIIGRNLLTQLGCTLNF

>102774\_6 0.4  
PQITLWQRPLVTIKIGGQLKEALLDTGADDTVLEEMNLSGRWKPKMIGGIGGFIKVRQYDQIPIEICGHKAIGTVLIG  
PTPVNIIGRNLLTQLGCTLNF

>102774\_7 0.4  
PQITLWQRPLVTIKIGGQLKEALLDTGADDTVLEEMNLSGRWKPKMIGGLGGFIKVRQYDQIPIEICGHKAIGTVLIG  
PTPVNIIGRNLLTQLGCTLNF

>102774\_11 0.4  
PQITLWQRPIVTIKIGGQLKEALLDTGADDTVLEEMNLSGRWKPKMIGGLGGFIKVRQYDQIPIEICGHKAIGTVLIG  
PTPVNIIGRNLLTQLGCTLNF

>102774\_14 0.4  
PQITLWQRPIVTIKIGGQLKEALLDTGADDTVLEEMNLSGRWKPKMIGGIGGFIKVRQYDQIPIEICGHKAIGTVLIG  
PTPVNIIGRNLLTQLGCTLNF

>102774\_15 0.4  
PQITLWQRPIVTIKIGGQLKEALLDTGADDTVLEEMNLSGRWKPKMIGGLGGFIKVRQYDQIPIEICGHKAIGTVLIG  
PTPVNIIGRNLLTQLGCTLNF

>257929\_0 0.3  
PQITLWQRPLVTVKVGQQLKEALLDTGADDTVLEEMNLQGRWKPKMIGGIGGFIKVKQYDQIPVEICGHKAIGTVLVG  
PTPVNIIGRNLLTQIGCTLNF

>206451\_0 0.4  
PQMTLWQRPLVTIRIGGQLKEALLDTGADDTVLEEMNLP GKWKPKMIGGIGGFIKVGQYDQIPIEICGHKAIGTVLIG  
PTPVNIIGRNLLTQIGCTLNF

>45116\_0 0.3  
PQITLWQRPLVTIKIGGQLKEALLDTGADDTVLEEMNLPGRWKPKMIGGLGGFIKVRQYDQILIEICGHKVIIGTVLVG  
PTPVNIIGRNLLTQIGCTLNF

>75046\_0 0.5  
PQITLWQRPLVTIKIGGQLKEALLDTGADDTVLEEMNLPGRWKPKMIGGIGGFIKVRQYDQIAIEICGHKAIGTVLVG  
PTPVNIIGRNLLTQIGCTLNF

>13251\_0 0.4  
PQITLWQRPLVTIRVGGQLKEALLDTGADDTVLEEMSLPGKWKPKMIGGIGGFIKVRQYDQVQIEICGHKAIGTVLVG  
PTPVNIIGRNLLTQIGCTLNF

>13251\_1 0.4  
PQITLWQRPLVTIRVGGQLKEALLDTGADDTVLEEMSLPGKWKPKMIGGIGGFIKVRQYDQVQIEICGHKAIGTVLVG  
PTPVNIIGRSLLTQIGCTLNF

>13251\_2 0.4  
PQITLWQRPLVTIRVGGQLKEALLDTGADDTVLEEMSLPGKWKPKMIGGIGGFIKVRQYDQVQIEICGHKAIGTVLIG  
PTPVNIIGRNLLTQIGCTLNF

>13251\_3 0.4  
PQITLWQRPLVTIRVGGQLKEALLDTGADDTVLEEMSLPGKWKPKMIGGIGGFIKVRQYDQVQIEICGHKAIGTVLIG  
PTPVNIIGRSLLTQIGCTLNF

>13251\_4 0.4  
PQITLWQRPLVTIRVGGQLKEALLDTGADDTVLEEISLPGKWKPKMIGGIGGFIKVRQYDQVQIEICGHKAIGTVLVG  
PTPVNIIGRNLLTQIGCTLNF

>13251\_5 0.4  
PQITLWQRPLVTIRVGGQLKEALLDTGADDTVLEEISLPGKWKPKMIGGIGGFIKVRQYDQVQIEICGHKAIGTVLVG  
PTPVNIIGRSLLTQIGCTLNF

>13251\_6 0.4  
PQITLWQRPLVTIRVGGQLKEALLDTGADDTVLEEISLPGKWKPKMIGGIGGFIKVRQYDQVQIEICGHKAIGTVLIG  
PTPVNIIGRNLLTQIGCTLNF

>13251\_7 0.4  
PQITLWQRPLVTIRVGGQLKEALLDTGADDTVLEEISLPGKWKPKMIGGIGGFIKVRQYDQVQIEICGHKAIGTVLIG  
PTPVNIIGRSLLTQIGCTLNF

>44058\_0 0.2  
PQITLWQRPLVTIKIGGQLKEALLDTGADDTVLEEMNLP GKWKPKMIGGIGGFIKVRQYDQITIEICGHKAIGTVLVG  
PTPVNIIGRNLLTQIGCTLNF

>44058\_1 0.2  
PQITLWQRPLVTIRIGGQLKEALLDTGADDTVLEEMNLP GKWKPKMIGGIGGFIKVRQYDQITIEICGHKAIGTVLVG  
PTPVNIIGRNLLTQIGCTLNF

>60639\_0 0.4  
PQITLWQRPLVNIKIGGQLKEALLDTGADDTVLEDMSLPGRWKPKMIGGIGGFIKVRQYDQIQVEICGHKAIGTVLVG  
PTPVNIIGRNLLTQIGCTLNF

>75054\_0 0.4  
PQITLWQRPLVTIKIGGQLKEALLDTGADDTVLEEMNLPGRWKPKMIGGIGGFIKVRQYDQITIEICGHKAIGTVLVG  
PTPVNIIGRNLLTQIGCTLNF

>75054\_2 0.4  
PQITLWQRPLVTIKIGGQLKEALLDTGADDTVLEEMNLPGRWKPKMIGGIGGFIKVRQYDQITIDICGHKAIGTVLVG  
PTPVNIIGRNLLTQIGCTLNF

>75054\_4 0.4  
PQITLWQRPLVTIKIGGQLKEALLDTGADDTVLEEINLPGRWKPKMIGGIGGFIKVRQYDQITIEICGHKAIGTVLVG  
PTPVNIIGRNLLTQIGCTLNF

>75054\_6 0.4  
PQITLWQRPLVTIKIGGQLKEALLDTGADDTVLEEINLPGRWKPKMIGGIGGFIKVRQYDQITIDICGHKAIGTVLVG  
PTPVNIIGRNLLTQIGCTLNF

>75054\_8 0.4  
PQITLWQRPIVTIKIGGQLKEALLDTGADDTVLEEMNLPGRWKPKMIGGIGGFIKVRQYDQITIEICGHKAIGTVLVG  
PTPVNIIGRNLLTQIGCTLNF

>75054\_10 0.4  
PQITLWQRPIVTIKIGGQLKEALLDTGADDTVLEEMNLPGRWKPKMIGGIGGFIKVRQYDQITIDICGHKAIGTVLVG  
PTPVNIIGRNLLTQIGCTLNF

>75054\_12 0.4  
PQITLWQRPIVTIKIGGQLKEALLDTGADDTVLEEINLPGRWKPKMIGGIGGFIKVRQYDQITIEICGHKAIGTVLVG  
PTPVNIIGRNLLTQIGCTLNF

>75054\_14 0.4  
PQITLWQRPIVTIKIGGQLKEALLDTGADDTVLEEINLPGRWKPKMIGGIGGFIKVRQYDQITIDICGHKAIGTVLVG  
PTPVNIIGRNLLTQIGCTLNF

>75114\_0 0.4  
PQITLWQRPLVTIKIGGQLKEALLDTGADDTVLEDMDLPGRWKPKMIGGIGGFIKVRQYDQISIEICGHKAIGTVLVG  
PTPINIGRNLLTQIGCTLNF

>148059\_0 0.5  
PQITLWQRPLVTIKIGGQLKEALLDTGADDTVLEEMNLPGRWKPKMIGGIGGFIKVKQYDQIQIEICGHKAIGTVLVG  
PTPVNIIGRNLLTQIGCTLNF

>148111\_0 0.5  
PQITLWQRPLVTVKIGGQLKEALLDTGADDTVLEEMNLPGRWKPRMIGGIGGFIKVRQYDQISMEICGHKAIGTVLIG  
PTPVNIIGRNLLTQIGCTLNF

>148111\_1 0.5  
PQITLWQRPLVTVKIGGQLKEALLDTGADDTVLEEMNLPGRWKPRMIGGIGGFIKVRQYDQVSMEICGHKAIGTVLIG  
PTPVNIIGRNLLTQIGCTLNF

>9706\_0 0.4  
PQITLWQRPLVTIKIGGQLKEALLDTGADDTVLEDMDLPGRWKPKMIGGIGGFIKVRQYDQILIEICGHKAIGTVLVG  
PTPVNIIGRNLLTQIGCTLNF

>28226\_0 0.4  
PQITLWQRPLVTIKIGGQLKEALLDTGADDTVLEEMNLPGRWKPKMIGGIGGFIKVRQYDQILVEICGHKAIGTVLVG  
PTPVNIIGRNLLTQMGCTLNF

>28226\_1 0.4  
PQITLWQRPLVTIKIGGQLKEALLDTGADDTVLEEMNLPGRWKPKMIGGIGGFIKVRQYDQILVEICGHKAIGTVLVG  
PTPVNIIGRNLWTQMGCTLNF

>28226\_2 0.4  
PQITLWQRPLVTIKIGGQLKEALLDTGADDTVLEEMNLP GKWKPKMIGGIGGFIKVRQYDQILVEICGHKAIGTVLVG  
PTPVNIIGRNLLTQMGCTLNF

>28226\_3 0.4  
PQITLWQRPLVTIKIGGQLKEALLDTGADDTVLEEMNLP GKWKPKMIGGIGGFIKVRQYDQILVEICGHKAIGTVLVG  
PTPVNIIGRNLWTQMGCTLNF

>28226\_4 0.4  
PQITLWQRPLVTIKIGGQLKEALLDTGADDTVLEEMDLPGRWKPKMIGGIGGFIKVRQYDQILVEICGHKAIGTVLVG  
PTPVNIIGRNLLTQMGCTLNF

>28226\_5 0.4  
PQITLWQRPLVTIKIGGQLKEALLDTGADDTVLEEMDLPGRWKPKMIGGIGGFIKVRQYDQILVEICGHKAIGTVLVG  
PTPVNIIGRNLLTQMGCTLNF

>28226\_6 0.4  
PQITLWQRPLVTIKIGGQLKEALLDTGADDTVLEEMDLPGKWKPKMIGGIGGFIKVRQYDQILVEICGHKAIGTVLVG  
PTPVNIIGRNLLTQMGCTLNF

>28226\_7 0.4  
PQITLWQRPLVTIKIGGQLKEALLDTGADDTVLEEMDLPGKWKPKMIGGIGGFIKVRQYDQILVEICGHKAIGTVLVG  
PTPVNIIGRNLLTQMGCTLNF

>44074\_0 0.4  
PQITLWQRPLVTVKIGGQLKEALLDTGADDTVLEEMDLPGRWKPKMIGGIGGFIKVRQYDQILIEICGHRAIGTVLVG  
PTPVNIIGRNLLTQIGCTLNF

>44074\_1 0.4  
PQITLWQRPLVTVRIGGQLKEALLDTGADDTVLEEMDLPGRWKPKMIGGIGGFIKVRQYDQILIEICGHRAIGTVLVG  
PTPVNIIGRNLLTQIGCTLNF

>45114\_0 0.2  
PQITLWQRPLVTIKIGGQLKEALLDTGADDTVLEEMNLPGRWKPKMIGGLGGFIKVRQYDQILIEICGHKAIGTVLVG  
PTPVNIIGRNLLTQIGCTLNF

>54452\_0 0.4  
PQITLWQRPLVTIKIGGQLTEALLDTGADDTVLEEMNLPGRWKPKMIGGIGGFIKVRQYDQILIEICGHKAIGTVLVG  
PTPVNIIGRNLLTQIGCTLNF

>75126\_0 0.5  
PQITLWQRPLVTVRIGGQLKEALLDTGADDTVLEEMNLPGKWKPKMIGGIGGFIKVRQYDQILVEICGHKAIGTVLVG  
PTPVNIIGRNLLTQIGCTLNF

>102796\_0 0.2  
PQITLWQRPLVTIKIGGQLKEALLDTGADDTVLEEIDLPGKWKPKMIGGLGGFIKVRQYDQILVEICGHKAIGTVLVG  
PTPVNIIGRNLLTQIGCTLNF

>102796\_1 0.2  
PQITLWQRPLVTIKIGGQLKEALLDTGADDTVLEKEIDLPGKWKPKMIGGLGGFIKVRQYDQILVEICGHKAIGTVLVG  
PTPVNIIGRNLLTQIGCTLNF

>109438\_0 0.5  
PQITLWQRPLVTIKVGGQLKEALLDTGADDTVLEEMSLPGKWKPKMIGGIGGFIKVRQYDQILIEICGHKAIGTVLVG  
PTPVNIIGRNLLTQIGCTLNF

>109438\_1 0.5  
PQITLWQRPLVTIKVGGQLKEALLDTGADDTVLEEMSLPGKWKPKMIGGIGGFIKVRQYDQILVEICGHKAIGTVLVG  
PTPVNIIGRNLLTQIGCTLNF

**Sequences for the SQV-resistant ensemble**

>117051\_0 1000.0  
PQITLWQRPFIPVKIGGQLIEALMDTGADDTVLEDINLPGRWKPKIIGGIGGFIKVRQYDQVEIEICGHKITSPLVVG  
ATPVNAIGRNVMTKLGCTLNF

>98601\_0 1000.0  
PQITLWQRPFVVTIKIGGQLIEALLDTGADDTVLEEMNLPGRWKPKIIGGIGGFVKVRQYDQIPIEICGHKVITTVLIG  
PTPVNAIGRNLLTQIGCTLNF

>98604\_0 1000.0  
PQITLWQRPFVVTIKIGGQLIEALLDTGADDTVLEEMNLPGRWKPKIIGGIGGFVKVRQYDQIPIEICGHKVISTVLVG  
PTPVNAIGRNLLTQIGCTLNF

>98604\_1 1000.0  
PQITLWQRPFVVTIKIGGQLIEALLDTGADDTVLEEINLPGRWKPKIIGGIGGFVKVRQYDQIPIEICGHKVISTVLVG  
PTPVNAIGRNLLTQIGCTLNF

>123049\_0 1000.0  
PQITLWQRPIITIKIGGQLKDVLMMDTGADDTVLEDIDLPGRWKPKLIGGIGGFVKVRQYDHPVVEVCGHKVTTTVLVG  
PTPVDVIGRNLLTQIGCTLNF

>123049\_1 1000.0  
PQITLWQRPIITIKIGGQLKDVLMMDTGADDTVLEDIDLPGRWKPKLIGGIGGFVKVRQYDNPVVEVCGHKVTTTVLVG  
PTPVDVIGRNLLTQIGCTLNF

>123049\_2 1000.0  
PQITLWQRPIITIKIGGQLKDVLMMDTGADDTVLEDIDLPGRWKPKLIGGIGGFVKVQYDHPVVEVCGHKVTTTVLVG  
PTPVDVIGRNLLTQIGCTLNF

>123049\_3 1000.0  
PQITLWQRPIITIKIGGQLKDVLMMDTGADDTVLEDIDLPGRWKPKLIGGIGGFVKVQYDNPVVEVCGHKVTTTVLVG  
PTPVDVIGRNLLTQIGCTLNF

>123049\_4 1000.0

PQITLWQRPIITIKIGGQLKDVLMMDTGADDTVLEDIDLPGKWKPKLIGGIGGFVKVRQYDHPVEVCGHKVTTTVLVG  
PTPVDVIGRNLLTQIGCTLNF  
>123049\_5 1000.0  
PQITLWQRPIITIKIGGQLKDVLMMDTGADDTVLEDIDLPGKWKPKLIGGIGGFVKVRQYDNPVEVCGHKVTTTVLVG  
PTPVDVIGRNLLTQIGCTLNF  
>123049\_6 1000.0  
PQITLWQRPIITIKIGGQLKDVLMMDTGADDTVLEDIDLPGKWKPKLIGGIGGFVKVKQYDHPVEVCGHKVTTTVLVG  
PTPVDVIGRNLLTQIGCTLNF  
>123049\_7 1000.0  
PQITLWQRPIITIKIGGQLKDVLMMDTGADDTVLEDIDLPGKWKPKLIGGIGGFVKVKQYDNPVEVCGHKVTTTVLVG  
PTPVDVIGRNLLTQIGCTLNF  
>123049\_8 1000.0  
PQITLWQRPIITIKIGGQLKDVLMMDTGADDTVLENIDLPGRWKPKLIGGIGGFVKVRQYDHPVEVCGHKVTTTVLVG  
PTPVDVIGRNLLTQIGCTLNF  
>123049\_9 1000.0  
PQITLWQRPIITIKIGGQLKDVLMMDTGADDTVLENIDLPGRWKPKLIGGIGGFVKVRQYDNPVEVCGHKVTTTVLVG  
PTPVDVIGRNLLTQIGCTLNF  
>123049\_10 1000.0  
PQITLWQRPIITIKIGGQLKDVLMMDTGADDTVLENIDLPGRWKPKLIGGIGGFVKVKQYDHPVEVCGHKVTTTVLVG  
PTPVDVIGRNLLTQIGCTLNF  
>123049\_11 1000.0  
PQITLWQRPIITIKIGGQLKDVLMMDTGADDTVLENIDLPGRWKPKLIGGIGGFVKVKQYDNPVEVCGHKVTTTVLVG  
PTPVDVIGRNLLTQIGCTLNF  
>123049\_12 1000.0  
PQITLWQRPIITIKIGGQLKDVLMMDTGADDTVLENIDLPGKWKPKLIGGIGGFVKVRQYDHPVEVCGHKVTTTVLVG  
PTPVDVIGRNLLTQIGCTLNF  
>123049\_13 1000.0  
PQITLWQRPIITIKIGGQLKDVLMMDTGADDTVLENIDLPGKWKPKLIGGIGGFVKVRQYDNPVEVCGHKVTTTVLVG  
PTPVDVIGRNLLTQIGCTLNF  
>123049\_14 1000.0  
PQITLWQRPIITIKIGGQLKDVLMMDTGADDTVLENIDLPGKWKPKLIGGIGGFVKVKQYDHPVEVCGHKVTTTVLVG  
PTPVDVIGRNLLTQIGCTLNF  
>123049\_15 1000.0  
PQITLWQRPIITIKIGGQLKDVLMMDTGADDTVLENIDLPGKWKPKLIGGIGGFVKVKQYDNPVEVCGHKVTTTVLVG  
PTPVDVIGRNLLTQIGCTLNF  
>147975\_1 1000.0  
PQITLWQRPILTVKVGGLHIEALLDTGADDTVLEGIDLPGRWKPKMIGGIGGFVKVRQYDQPIEICGHKVLSTVLV  
PTPVNVIGRNLMTQIGCTLNF  
>143332\_24 1000.0  
PQITLWQRPIVTVKIGGHLVEVLLDTGADDTVLEEINLPGRWKPKMIGGIGGFVKVKQYDQVPIEIWGHKVLSTVLV  
PTPVNVIGRNLMTQIGCTLNF  
>143332\_25 1000.0  
PQITLWQRPIVTVKIGGHLVEVLLDTGADDTVLEEINLPGRWKPKMIGGIGGFVKVKQYDQVPIEIWGHKVLSTVLV  
PTPVNVVGRNLMTQIGCTLNF  
>143332\_26 1000.0  
PQITLWQRPIVTVKIGGHLVEVLLDTGADDTVLEEINLPGRWKPKMIGGIGGFVVRVKQYDQVPIEIWGHKVLSTVLV  
PTPVNVIGRNLMTQIGCTLNF  
>143332\_27 1000.0  
PQITLWQRPIVTVKIGGHLVEVLLDTGADDTVLEEINLPGRWKPKMIGGIGGFVVRVKQYDQVPIEIWGHKVLSTVLV  
PTPVNVVGRNLMTQIGCTLNF  
>143332\_28 1000.0  
PQITLWQRPIVTVKIGGHLVEVLLDTGADDTVLEEINLPGRWKPKIIGGIGGFVKVKQYDQVPIEIWGHKVLSTVLV  
PTPVNVIGRNLMTQIGCTLNF  
>143332\_29 1000.0  
PQITLWQRPIVTVKIGGHLVEVLLDTGADDTVLEEINLPGRWKPKIIGGIGGFVKVKQYDQVPIEIWGHKVLSTVLV  
PTPVNVVGRNLMTQIGCTLNF  
>143332\_30 1000.0  
PQITLWQRPIVTVKIGGHLVEVLLDTGADDTVLEEINLPGRWKPKIIGGIGGFVVRVKQYDQVPIEIWGHKVLSTVLV  
PTPVNVIGRNLMTQIGCTLNF  
>143332\_31 1000.0  
PQITLWQRPIVTVKIGGHLVEVLLDTGADDTVLEEINLPGRWKPKIIGGIGGFVVRVKQYDQVPIEIWGHKVLSTVLV  
PTPVNVVGRNLMTQIGCTLNF  
>143332\_32 1000.0

PQITLWQRPIVTVKIGGHLVEVLLDTGADDTVIEEINLPGRWPKMIGGIGGFVKVKQYDQVPIEIWGHKVLSTVLVG  
PTPVNVIGRNLMTQIGCTLNF  
>143332\_33 1000.0  
PQITLWQRPIVTVKIGGHLVEVLLDTGADDTVIEEINLPGRWPKMIGGIGGFVKVKQYDQVPIEIWGHKVLSTVLVG  
PTPVNVVGRNLMTQIGCTLNF  
>143332\_34 1000.0  
PQITLWQRPIVTVKIGGHLVEVLLDTGADDTVIEEINLPGRWPKMIGGIGGFVVRVKQYDQVPIEIWGHKVLSTVLVG  
PTPVNVIGRNLMTQIGCTLNF  
>143332\_35 1000.0  
PQITLWQRPIVTVKIGGHLVEVLLDTGADDTVIEEINLPGRWPKMIGGIGGFVVRVKQYDQVPIEIWGHKVLSTVLVG  
PTPVNVVGRNLMTQIGCTLNF  
>143332\_36 1000.0  
PQITLWQRPIVTVKIGGHLVEVLLDTGADDTVIEEINLPGRWPKMIGGIGGFVVRVKQYDQVPIEIWGHKVLSTVLVG  
PTPVNVIGRNLMTQIGCTLNF  
>143332\_37 1000.0  
PQITLWQRPIVTVKIGGHLVEVLLDTGADDTVIEEINLPGRWPKMIGGIGGFVVRVKQYDQVPIEIWGHKVLSTVLVG  
PTPVNVVGRNLMTQIGCTLNF  
>143332\_38 1000.0  
PQITLWQRPIVTVKIGGHLVEVLLDTGADDTVIEEINLPGRWPKMIGGIGGFVVRVKQYDQVPIEIWGHKVLSTVLVG  
PTPVNVIGRNLMTQIGCTLNF  
>143332\_39 1000.0  
PQITLWQRPIVTVKIGGHLVEVLLDTGADDTVIEEINLPGRWPKMIGGIGGFVVRVKQYDQVPIEIWGHKVLSTVLVG  
PTPVNVVGRNLMTQIGCTLNF  
>143332\_40 1000.0  
PQITLWQRPIVTVKIGGHLVEVLLDTGADDTVVEEINLPGRWPKMIGGIGGFVKVKQYDQVPIEIWGHKVLSTVLVG  
PTPVNVIGRNLMTQIGCTLNF  
>143332\_41 1000.0  
PQITLWQRPIVTVKIGGHLVEVLLDTGADDTVVEEINLPGRWPKMIGGIGGFVKVKQYDQVPIEIWGHKVLSTVLVG  
PTPVNVVGRNLMTQIGCTLNF  
>143332\_42 1000.0  
PQITLWQRPIVTVKIGGHLVEVLLDTGADDTVVEEINLPGRWPKMIGGIGGFVVRVKQYDQVPIEIWGHKVLSTVLVG  
PTPVNVIGRNLMTQIGCTLNF  
>143332\_43 1000.0  
PQITLWQRPIVTVKIGGHLVEVLLDTGADDTVVEEINLPGRWPKMIGGIGGFVVRVKQYDQVPIEIWGHKVLSTVLVG  
PTPVNVVGRNLMTQIGCTLNF  
>143332\_44 1000.0  
PQITLWQRPIVTVKIGGHLVEVLLDTGADDTVVEEINLPGRWPKMIGGIGGFVVRVKQYDQVPIEIWGHKVLSTVLVG  
PTPVNVIGRNLMTQIGCTLNF  
>143332\_45 1000.0  
PQITLWQRPIVTVKIGGHLVEVLLDTGADDTVVEEINLPGRWPKMIGGIGGFVVRVKQYDQVPIEIWGHKVLSTVLVG  
PTPVNVVGRNLMTQIGCTLNF  
>143332\_46 1000.0  
PQITLWQRPIVTVKIGGHLVEVLLDTGADDTVVEEINLPGRWPKMIGGIGGFVVRVKQYDQVPIEIWGHKVLSTVLVG  
PTPVNVIGRNLMTQIGCTLNF  
>143332\_47 1000.0  
PQITLWQRPIVTVKIGGHLVEVLLDTGADDTVVEEINLPGRWPKMIGGIGGFVVRVKQYDQVPIEIWGHKVLSTVLVG  
PTPVNVVGRNLMTQIGCTLNF  
>143332\_72 1000.0  
PQITLWQRPIVTVKVGHLVEVLLDTGADDTVLEEINLPGRWPKMIGGIGGFVKVKQYDQVPIEIWGHKVLSTVLVG  
PTPVNVIGRNLMTQIGCTLNF  
>143473\_26 1000.0  
PQITLWQRPIVIVKIGGQIREALLDTGADDTVFEEDIDLPGRWTPKLIIGGIGGFVKVRQYDQVPIEICGHKVISTVLVG  
PTPANIIGRNLMTQLGCTLNF  
>143473\_30 1000.0  
PQITLWQRPIVIVKIGGQIREALLDTGADDTVFEEDIDLPGRWTPKLIIGGIGGFVVRVQYDQVPIEICGHKVISTVLVG  
PTPANIIGRNLMTQLGCTLNF  
>113050\_0 1000.0  
PQITLWQRPFVTVKIGGQITEALLDTGADDTILENINLPGRWPKMIIQGIGGFLKVRQYDQIPIEIEGHKVIGSVVVG  
PTPVNVIGRNVMSQLGCTLNF  
>117139\_0 1000.0  
PQITLWQRPIVTIKIGGQLKEALLDTGADDTVLEEMDLPGRWPKMIVGIGGLVKVRQYDQIPIEICGHKTIGTVLIG  
PTPANIIGRNLMTQLGCTLNF  
>113192\_1 1000.0



PQITLWQRPFVMTMKIGGQLIEALLDTGADDTVLEEISLPGRWPKIIGGIGGFVKVRQYDQVPIEVFGHKATTTVLVG  
PTPVNVIGRNLMTQLGCTLNF  
>113192\_3 1000.0  
PQITLWQRPFVMTMKIGGQLIEALLDTGADDTVLEEISLPGRWPKIIGGIGGFVKVRQYDQVPIEVFGQKATTTVLVG  
PTPVNVIGRNLMTQLGCTLNF  
>113192\_5 1000.0  
PQITLWQRPFVMTMKIGGQLIEALLDTGADDTVLEEISLPGRWPKIIGGIGGFVKVRQYDQVPVEVFGHKATTTVLVG  
PTPVNVIGRNLMTQLGCTLNF  
>113192\_7 1000.0  
PQITLWQRPFVMTMKIGGQLIEALLDTGADDTVLEEISLPGRWPKIIGGIGGFVKVRQYDQVPVEVFGQKATTTVLVG  
PTPVNVIGRNLMTQLGCTLNF  
>113192\_9 1000.0  
PQITLWQRPFVMTMKIGGQIIEALLDTGADDTVLEEISLPGRWPKIIGGIGGFVKVRQYDQVPIEVFGHKATTTVLVG  
PTPVNVIGRNLMTQLGCTLNF  
>113192\_11 1000.0  
PQITLWQRPFVMTMKIGGQIIEALLDTGADDTVLEEISLPGRWPKIIGGIGGFVKVRQYDQVPIEVFGQKATTTVLVG  
PTPVNVIGRNLMTQLGCTLNF  
>113192\_13 1000.0  
PQITLWQRPFVMTMKIGGQIIEALLDTGADDTVLEEISLPGRWPKIIGGIGGFVKVRQYDQVPVEVFGHKATTTVLVG  
PTPVNVIGRNLMTQLGCTLNF  
>113192\_15 1000.0  
PQITLWQRPFVMTMKIGGQIIEALLDTGADDTVLEEISLPGRWPKIIGGIGGFVKVRQYDQVPVEVFGQKATTTVLVG  
PTPVNVIGRNLMTQLGCTLNF  
>147991\_0 1000.0  
PQITLWQRPVIVTKIGGQLKEALLDTGADDTVIEGINLPKWKPKMIGGIGGFVKVREYEQIPIEICGHKTISTVLVG  
PTPVNVIGRNLMTQLGCTLNF  
>147991\_1 1000.0  
PQITLWQRPVIVTKIGGQLKEALLDTGADDTVIEGINLPKWKPKMIGGIGGFVKVREYEQIPIEICGHKTISTVLVG  
PTPVNVIGRNLMTQLGCTLNF  
>147991\_2 1000.0  
PQITLWQRPVIVTKIGGQLKEALLDTGADDTVIEGINLPKWKPKMIGGIGGFVKVKEYEQIPIEICGHKTISTVLVG  
PTPVNVIGRNLMTQLGCTLNF  
>147991\_3 1000.0  
PQITLWQRPVIVTKIGGQLKEALLDTGADDTVIEGINLPKWKPKMIGGIGGFVKVKEYEQIPIEICGHKTISTVLVG  
PTPVNVIGRNLMTQLGCTLNF  
>147991\_4 1000.0  
PQITLWQRPVIVTKIGGQLKEALLDTGADDTVIEGINLPKWKPKMIGGIGGFVVRVREYEQIPIEICGHKTISTVLVG  
PTPVNVIGRNLMTQLGCTLNF  
>147991\_5 1000.0  
PQITLWQRPVIVTKIGGQLKEALLDTGADDTVIEGINLPKWKPKMIGGIGGFVVRVREYEQIPIEICGHKTISTVLVG  
PTPVNVIGRNLMTQLGCTLNF  
>147991\_6 1000.0  
PQITLWQRPVIVTKIGGQLKEALLDTGADDTVIEGINLPKWKPKMIGGIGGFVVRVKEYEQIPIEICGHKTISTVLVG  
PTPVNVIGRNLMTQLGCTLNF  
>147991\_7 1000.0  
PQITLWQRPVIVTKIGGQLKEALLDTGADDTVIEGINLPKWKPKMIGGIGGFVVRVKEYEQIPIEICGHKTISTVLVG  
PTPVNVIGRNLMTQLGCTLNF  
>147991\_8 1000.0  
PQITLWQRPVIVTKIGGQLKEALLDTGADDTVIEGINLPKWKPKIIGGIGGFVKVREYEQIPIEICGHKTISTVLVG  
PTPVNVIGRNLMTQLGCTLNF  
>147991\_9 1000.0  
PQITLWQRPVIVTKIGGQLKEALLDTGADDTVIEGINLPKWKPKIIGGIGGFVKVREYEQIPIEICGHKTISTVLVG  
PTPVNVIGRNLMTQLGCTLNF  
>147991\_10 1000.0  
PQITLWQRPVIVTKIGGQLKEALLDTGADDTVIEGINLPKWKPKIIGGIGGFVKVKEYEQIPIEICGHKTISTVLVG  
PTPVNVIGRNLMTQLGCTLNF  
>147991\_11 1000.0  
PQITLWQRPVIVTKIGGQLKEALLDTGADDTVIEGINLPKWKPKIIGGIGGFVKVKEYEQIPIEICGHKTISTVLVG  
PTPVNVIGRNLMTQLGCTLNF  
>147991\_12 1000.0  
PQITLWQRPVIVTKIGGQLKEALLDTGADDTVIEGINLPKWKPKIIGGIGGFVVRVREYEQIPIEICGHKTISTVLVG  
PTPVNVIGRNLMTQLGCTLNF  
>147991\_13 1000.0

PQITLWQRPIVTVKIGGQLKEALLDTGADDTVIEGINLPGKWKPKIIGGIGGFVRVREYEQIPIEICGHKTVSTVLVG  
PTPVNVIGRNLMTQLGCTLNF  
>147991\_14 1000.0  
PQITLWQRPIVTVKIGGQLKEALLDTGADDTVIEGINLPGKWKPKIIGGIGGFVRVKEYEQIPIEICGHKTISTVLVG  
PTPVNVIGRNLMTQLGCTLNF  
>147991\_15 1000.0  
PQITLWQRPIVTVKIGGQLKEALLDTGADDTVIEGINLPGKWKPKIIGGIGGFVRVKEYEQIPIEICGHKTVSTVLVG  
PTPVNVIGRNLMTQLGCTLNF  
>143473\_1 1000.0  
PQITLWQRPIVTVKIGGQLREALLDTGADDTVFEEDLPGRWTPKLIIGGIGGFVKVRQYDQVPIEICGHKITSTVLVG  
PTPANIIGRNLMTQLGCTLNF  
>187151\_2 1000.0  
PQITLWQRPIITVKIGGHLIEALLDTGADDTVLEEMNLPGRWKPKIIGGIGGFVKVRQYDQIPIEICGHKVMGTVLVG  
PTPVNVIGRNLMTQIGCTLNF  
>117041\_0 1000.0  
PQITLWQRPIVTIKVGGQLKEALLDTGADDTVFEEMNLPGRWKPKIIGGIGGFMKVRQYDQVPIEFFGHKALTTLVG  
PTPVNVIGRNLMTQIGVTLNF  
>117041\_1 1000.0  
PQITLWQRPIVTIKVGGQLKEALLDTGADDTVFEEMNLPGRWKPKIIGGIGGFMKVRQYDQVPIEFFGHKALTTLVG  
PTPVNVIGRNLMTQMGVTLNF  
>117041\_2 1000.0  
PQITLWQRPIVTIKVGGQLKEALLDTGADDTVFEEMNLPGRWKPKIIGGIGGFVKVRQYDQVPIEFFGHKALTTLVG  
PTPVNVIGRNLMTQIGVTLNF  
>117041\_3 1000.0  
PQITLWQRPIVTIKVGGQLKEALLDTGADDTVFEEMNLPGRWKPKIIGGIGGFVKVRQYDQVPIEFFGHKALTTLVG  
PTPVNVIGRNLMTQMGVTLNF  
>117041\_4 1000.0  
PQITLWQRPIVTIKVGGQLKEALLDTGADDTVFEEMDLPGRWKPKIIGGIGGFVKVRQYDQVPIEFFGHKALTTLVG  
PTPVNVIGRNLMTQIGVTLNF  
>117041\_5 1000.0  
PQITLWQRPIVTIKVGGQLKEALLDTGADDTVFEEMDLPGRWKPKIIGGIGGFVKVRQYDQVPIEFFGHKALTTLVG  
PTPVNVIGRNLMTQMGVTLNF  
>117041\_6 1000.0  
PQITLWQRPIVTIKVGGQLKEALLDTGADDTVFEEMDLPGRWKPKIIGGIGGFVKVRQYDQVPIEFFGHKALTTLVG  
PTPVNVIGRNLMTQIGVTLNF  
>117041\_7 1000.0  
PQITLWQRPIVTIKVGGQLKEALLDTGADDTVFEEMDLPGRWKPKIIGGIGGFVKVRQYDQVPIEFFGHKALTTLVG  
PTPVNVIGRNLMTQMGVTLNF  
>117041\_8 1000.0  
PQITLWQRPIVTIKVGGQLKEALLDTGADDTVFEENVNLPGRWKPKIIGGIGGFVKVRQYDQVPIEFFGHKALTTLVG  
PTPVNVIGRNLMTQIGVTLNF  
>117041\_9 1000.0  
PQITLWQRPIVTIKVGGQLKEALLDTGADDTVFEENVNLPGRWKPKIIGGIGGFVKVRQYDQVPIEFFGHKALTTLVG  
PTPVNVIGRNLMTQMGVTLNF  
>117041\_10 1000.0  
PQITLWQRPIVTIKVGGQLKEALLDTGADDTVFEENVNLPGRWKPKIIGGIGGFVKVRQYDQVPIEFFGHKALTTLVG  
PTPVNVIGRNLMTQIGVTLNF  
>117041\_11 1000.0  
PQITLWQRPIVTIKVGGQLKEALLDTGADDTVFEENVNLPGRWKPKIIGGIGGFVKVRQYDQVPIEFFGHKALTTLVG  
PTPVNVIGRNLMTQMGVTLNF  
>117041\_12 1000.0  
PQITLWQRPIVTIKVGGQLKEALLDTGADDTVFEVDLPGRWKPKIIGGIGGFVKVRQYDQVPIEFFGHKALTTLVG  
PTPVNVIGRNLMTQIGVTLNF  
>117041\_13 1000.0  
PQITLWQRPIVTIKVGGQLKEALLDTGADDTVFEVDLPGRWKPKIIGGIGGFVKVRQYDQVPIEFFGHKALTTLVG  
PTPVNVIGRNLMTQMGVTLNF  
>117041\_14 1000.0  
PQITLWQRPIVTIKVGGQLKEALLDTGADDTVFEVDLPGRWKPKIIGGIGGFVKVRQYDQVPIEFFGHKALTTLVG  
PTPVNVIGRNLMTQIGVTLNF  
>117041\_15 1000.0  
PQITLWQRPIVTIKVGGQLKEALLDTGADDTVFEVDLPGRWKPKIIGGIGGFVKVRQYDQVPIEFFGHKALTTLVG  
PTPVNVIGRNLMTQMGVTLNF  
>117041\_16 1000.0

PQITLWQRPIVTIKVGGQLKEALLDTGADDTVFDEMNLPGRWKPKIIGGIGGFMKVRQYDQVPIEFFGHKALTTLVGV  
 PTPVNVIGRNLMTQIGVTLNF  
 >117041\_17 1000.0  
 PQITLWQRPIVTIKVGGQLKEALLDTGADDTVFDEMNLPGRWKPKIIGGIGGFMKVRQYDQVPIEFFGHKALTTLVGV  
 PTPVNVIGRNLMTQMGVTLNF  
 >117041\_18 1000.0  
 PQITLWQRPIVTIKVGGQLKEALLDTGADDTVFDEMNLPGRWKPKIIGGIGGFVKVRQYDQVPIEFFGHKALTTLVGV  
 PTPVNVIGRNLMTQIGVTLNF  
 >117041\_19 1000.0  
 PQITLWQRPIVTIKVGGQLKEALLDTGADDTVFDEMNLPGRWKPKIIGGIGGFVKVRQYDQVPIEFFGHKALTTLVGV  
 PTPVNVIGRNLMTQMGVTLNF  
 >117041\_20 1000.0  
 PQITLWQRPIVTIKVGGQLKEALLDTGADDTVFDEMDLPGRWKPKIIGGIGGFMKVRQYDQVPIEFFGHKALTTLVGV  
 PTPVNVIGRNLMTQIGVTLNF  
 >117041\_21 1000.0  
 PQITLWQRPIVTIKVGGQLKEALLDTGADDTVFDEMDLPGRWKPKIIGGIGGFMKVRQYDQVPIEFFGHKALTTLVGV  
 PTPVNVIGRNLMTQMGVTLNF  
 >117041\_22 1000.0  
 PQITLWQRPIVTIKVGGQLKEALLDTGADDTVFDEMDLPGRWKPKIIGGIGGFVKVRQYDQVPIEFFGHKALTTLVGV  
 PTPVNVIGRNLMTQIGVTLNF  
 >117041\_23 1000.0  
 PQITLWQRPIVTIKVGGQLKEALLDTGADDTVFDEMDLPGRWKPKIIGGIGGFVKVRQYDQVPIEFFGHKALTTLVGV  
 PTPVNVIGRNLMTQMGVTLNF

**Sequences for the SQV-susceptible ensemble**

>102782\_40 0.3  
 PQITLWQRPIVTIKVEGQLKEAPLDTGADDTVLEDVNLPGRWKPKMIGGLGGFIKVRQYDQIHIEICGHKAIGTVLVGV  
 PTPVNIIGRNMLTQIGCTLNF  
 >102782\_41 0.3  
 PQITLWQRPIVTIKVEGQLKEAPLDTGADDTVLEDVNLPGRWKPKMIGGLGGFIKVRQYDQIHIEICGHKAIGTVLVGV  
 PTPVNIIGRSMLTQIGCTLNF  
 >102782\_42 0.3  
 PQITLWQRPIVTIKVEGQLKEAPLDTGADDTVLEDVNLPGRWKPKMIGGLGGFIKVRQYDQIHIEICGHKAIGTVLVGV  
 PTPVNIIGRNMLTQIGCTLNF  
 >102782\_43 0.3  
 PQITLWQRPIVTIKVEGQLKEAPLDTGADDTVLEDVNLPGRWKPKMIGGLGGFIKVRQYDQIHIEICGHKAIGTVLVGV  
 PTPVNIIGRSMLTQIGCTLNF  
 >13246\_1 0.1  
 PQITLWQRPLVTIKIGGQLKEALLDTGADDTVLEEMNLPGRWKPKMIGGIGGFVKVRQYDQISVEICGHKATGTVLVGV  
 PTPTNIIIGRNLLTQIGCTLNF  
 >13246\_3 0.1  
 PQITLWQRPLVTIKIGGQLKEALLDTGADDTVLEEMNLPGRWKPKIIGGIGGFVKVRQYDQISVEICGHKATGTVLVGV  
 PTPTNIIIGRNLLTQIGCTLNF  
 >13246\_5 0.1  
 PQITLWQRPLVTIKIGGQLKEALLDTGADDTVLEELNLPGRWKPKMIGGIGGFVKVRQYDQISVEICGHKATGTVLVGV  
 PTPTNIIIGRNLLTQIGCTLNF  
 >13246\_7 0.1  
 PQITLWQRPLVTIKIGGQLKEALLDTGADDTVLEELNLPGRWKPKIIGGIGGFVKVRQYDQISVEICGHKATGTVLVGV  
 PTPTNIIIGRNLLTQIGCTLNF  
 >13246\_9 0.1  
 PQITLWQRPFVTIKIGGQLKEALLDTGADDTVLEEMNLPGRWKPKMIGGIGGFVKVRQYDQISVEICGHKATGTVLVGV  
 PTPTNIIIGRNLLTQIGCTLNF  
 >13246\_11 0.1  
 PQITLWQRPFVTIKIGGQLKEALLDTGADDTVLEEMNLPGRWKPKIIGGIGGFVKVRQYDQISVEICGHKATGTVLVGV  
 PTPTNIIIGRNLLTQIGCTLNF  
 >13246\_13 0.1  
 PQITLWQRPFVTIKIGGQLKEALLDTGADDTVLEELNLPGRWKPKMIGGIGGFVKVRQYDQISVEICGHKATGTVLVGV  
 PTPTNIIIGRNLLTQIGCTLNF  
 >13246\_15 0.1  
 PQITLWQRPFVTIKIGGQLKEALLDTGADDTVLEELNLPGRWKPKIIGGIGGFVKVRQYDQISVEICGHKATGTVLVGV  
 PTPTNIIIGRNLLTQIGCTLNF  
 >13246\_0 0.1  
 PQITLWQRPLVTIKIGGQLKEALLDTGADDTVLEEMNLPGRWKPKMIGGIGGFVKVRQYDQISVEICGHKATGTVLVGV

PTPANIIGRNLLTQIGCTLNF  
>13246\_2 0.1  
PQITLWQRPLVTIKIGGQLKEALLDTGADDTVLEEMNLPGRWKPKIIGGIGGFIKVRQYDQISVEICGHKATGTVLIG  
PTPANIIGRNLLTQIGCTLNF  
>13246\_4 0.1  
PQITLWQRPLVTIKIGGQLKEALLDTGADDTVLEELNLPGRWKPKMIGGIGGFIKVRQYDQISVEICGHKATGTVLIG  
PTPANIIGRNLLTQIGCTLNF  
>13246\_6 0.1  
PQITLWQRPLVTIKIGGQLKEALLDTGADDTVLEELNLPGRWKPKIIGGIGGFIKVRQYDQISVEICGHKATGTVLIG  
PTPANIIGRNLLTQIGCTLNF  
>13246\_8 0.1  
PQITLWQRPFVTIKIGGQLKEALLDTGADDTVLEEMNLPGRWKPKMIGGIGGFIKVRQYDQISVEICGHKATGTVLIG  
PTPANIIGRNLLTQIGCTLNF  
>13246\_10 0.1  
PQITLWQRPFVTIKIGGQLKEALLDTGADDTVLEEMNLPGRWKPKIIGGIGGFIKVRQYDQISVEICGHKATGTVLIG  
PTPANIIGRNLLTQIGCTLNF  
>13246\_12 0.1  
PQITLWQRPFVTIKIGGQLKEALLDTGADDTVLEELNLPGRWKPKMIGGIGGFIKVRQYDQISVEICGHKATGTVLIG  
PTPANIIGRNLLTQIGCTLNF  
>13246\_14 0.1  
PQITLWQRPFVTIKIGGQLKEALLDTGADDTVLEELNLPGRWKPKIIGGIGGFIKVRQYDQISVEICGHKATGTVLIG  
PTPANIIGRNLLTQIGCTLNF  
>55835\_1 0.2  
PQITLWQRPLVPIKIGGQIKEALLDTGADDTILEDINLPGRWKPKMAGGIGGFIKVRQYDQIPVEICGHKVIGTVLVG  
PTPVNIIGRNLLTQLGCTLNF  
>55835\_3 0.2  
PQITLWQRPLVPIKIGGQIKEALLDTGADDTILEDINLPGRWKPKMAGGIGGFIKVRQYDQIPVEICGHKVIGTVLVG  
PTPVNIIGRNLLTQLGCTLNF  
>55835\_5 0.2  
PQITLWQRPLVPIKIGGQIKEALLDTGADDTILEDINLPGRWKPKLAGGIGGFIKVRQYDQIPVEICGHKVIGTVLVG  
PTPVNIIGRNLLTQLGCTLNF  
>55835\_7 0.2  
PQITLWQRPLVPIKIGGQIKEALLDTGADDTILEDINLPGRWKPKLAGGIGGFIKVRQYDQIPVEICGHKVIGTVLVG  
PTPVNIIGRNLLTQLGCTLNF  
>55835\_9 0.2  
PQITLWQRPLVPIKIGGQIKEALLDTGADDTILEDINLPGRWKPKMAGGIGGFIKVRQYDQIPVEICGHKVIGTVLVG  
PTPVNIIGRNLLTQLGCTLNF  
>55835\_11 0.2  
PQITLWQRPLVPIKIGGQIKEALLDTGADDTILEDINLPGRWKPKMAGGIGGFIKVRQYDQIPVEICGHKVIGTVLVG  
PTPVNIIGRNLLTQLGCTLNF  
>55835\_13 0.2  
PQITLWQRPLVPIKIGGQIKEALLDTGADDTILEDINLPGRWKPKLAGGIGGFIKVRQYDQIPVEICGHKVIGTVLVG  
PTPVNIIGRNLLTQLGCTLNF  
>55835\_15 0.2  
PQITLWQRPLVPIKIGGQIKEALLDTGADDTILEDINLPGRWKPKLAGGIGGFIKVRQYDQIPVEICGHKVIGTVLVG  
PTPVNIIGRNLLTQLGCTLNF  
>55835\_33 0.2  
PQITLWQRPIVPIKIGGQIKEALLDTGADDTILEDINLPGRWKPKMAGGIGGFIKVRQYDQIPVEICGHKVIGTVLVG  
PTPVNIIGRNLLTQLGCTLNF  
>55835\_35 0.2  
PQITLWQRPIVPIKIGGQIKEALLDTGADDTILEDINLPGRWKPKMAGGIGGFIKVRQYDQIPVEICGHKVIGTVLVG  
PTPVNIIGRNLLTQLGCTLNF  
>55835\_37 0.2  
PQITLWQRPIVPIKIGGQIKEALLDTGADDTILEDINLPGRWKPKLAGGIGGFIKVRQYDQIPVEICGHKVIGTVLVG  
PTPVNIIGRNLLTQLGCTLNF  
>55835\_39 0.2  
PQITLWQRPIVPIKIGGQIKEALLDTGADDTILEDINLPGRWKPKLAGGIGGFIKVRQYDQIPVEICGHKVIGTVLVG  
PTPVNIIGRNLLTQLGCTLNF  
>55835\_41 0.2  
PQITLWQRPIVPIKIGGQIKEALLDTGADDTILEDINLPGRWKPKMAGGIGGFIKVRQYDQIPVEICGHKVIGTVLVG  
PTPVNIIGRNLLTQLGCTLNF  
>55835\_43 0.2  
PQITLWQRPIVPIKIGGQIKEALLDTGADDTILEDINLPGRWKPKMAGGIGGFIKVRQYDQIPVEICGHKVIGTVLVG

PTPVNIIGRNLLTQLGCTLNF  
>55835\_45 0.2  
PQITLWQRPIVPIKIGGQIKEALLDTGADDTILEDINLPGKWKPKLAGGIGGFIVRQYDQIPVEICGHKVIGTVLVG  
PTPVNIIGRNLLTQLGCTLNF  
>55835\_47 0.2  
PQITLWQRPIVPIKIGGQIKEALLDTGADDTILEDINLPGKWKPKLAGGIGGFIVRQYDQIPVEICGHKVIGTVLVG  
PTPVNIIGRNLLTQLGCTLNF  
>55835\_0 0.2  
PQITLWQRPLVPIKIGGQIKEALLDTGADDTILEDINLPGRWKPKMAGGIGGFIVRQYDQIPVEICGHKAIGTVLVG  
PTPVNIIGRNLLTQLGCTLNF  
>55835\_2 0.2  
PQITLWQRPLVPIKIGGQIKEALLDTGADDTILEDINLPGRWKPKMAGGIGGFIVRQYDQIPVEICGHKAIGTVLVG  
PTPVNIIGRNLLTQLGCTLNF  
>55835\_4 0.2  
PQITLWQRPLVPIKIGGQIKEALLDTGADDTILEDINLPGRWKPKLAGGIGGFIVRQYDQIPVEICGHKAIGTVLVG  
PTPVNIIGRNLLTQLGCTLNF  
>55835\_6 0.2  
PQITLWQRPLVPIKIGGQIKEALLDTGADDTILEDINLPGRWKPKLAGGIGGFIVRQYDQIPVEICGHKAIGTVLVG  
PTPVNIIGRNLLTQLGCTLNF  
>55835\_8 0.2  
PQITLWQRPLVPIKIGGQIKEALLDTGADDTILEDINLPGKWKPKMAGGIGGFIVRQYDQIPVEICGHKAIGTVLVG  
PTPVNIIGRNLLTQLGCTLNF  
>55835\_10 0.2  
PQITLWQRPLVPIKIGGQIKEALLDTGADDTILEDINLPGKWKPKMAGGIGGFIVRQYDQIPVEICGHKAIGTVLVG  
PTPVNIIGRNLLTQLGCTLNF  
>55835\_12 0.2  
PQITLWQRPLVPIKIGGQIKEALLDTGADDTILEDINLPGKWKPKLAGGIGGFIVRQYDQIPVEICGHKAIGTVLVG  
PTPVNIIGRNLLTQLGCTLNF  
>55835\_14 0.2  
PQITLWQRPLVPIKIGGQIKEALLDTGADDTILEDINLPGKWKPKLAGGIGGFIVRQYDQIPVEICGHKAIGTVLVG  
PTPVNIIGRNLLTQLGCTLNF  
>55835\_32 0.2  
PQITLWQRPIVPIKIGGQIKEALLDTGADDTILEDINLPGRWKPKMAGGIGGFIVRQYDQIPVEICGHKAIGTVLVG  
PTPVNIIGRNLLTQLGCTLNF  
>55835\_34 0.2  
PQITLWQRPIVPIKIGGQIKEALLDTGADDTILEDINLPGRWKPKMAGGIGGFIVRQYDQIPVEICGHKAIGTVLVG  
PTPVNIIGRNLLTQLGCTLNF  
>55835\_36 0.2  
PQITLWQRPIVPIKIGGQIKEALLDTGADDTILEDINLPGRWKPKLAGGIGGFIVRQYDQIPVEICGHKAIGTVLVG  
PTPVNIIGRNLLTQLGCTLNF  
>55835\_38 0.2  
PQITLWQRPIVPIKIGGQIKEALLDTGADDTILEDINLPGRWKPKLAGGIGGFIVRQYDQIPVEICGHKAIGTVLVG  
PTPVNIIGRNLLTQLGCTLNF  
>55835\_40 0.2  
PQITLWQRPIVPIKIGGQIKEALLDTGADDTILEDINLPGKWKPKMAGGIGGFIVRQYDQIPVEICGHKAIGTVLVG  
PTPVNIIGRNLLTQLGCTLNF  
>55835\_42 0.2  
PQITLWQRPIVPIKIGGQIKEALLDTGADDTILEDINLPGKWKPKMAGGIGGFIVRQYDQIPVEICGHKAIGTVLVG  
PTPVNIIGRNLLTQLGCTLNF  
>55835\_44 0.2  
PQITLWQRPIVPIKIGGQIKEALLDTGADDTILEDINLPGKWKPKLAGGIGGFIVRQYDQIPVEICGHKAIGTVLVG  
PTPVNIIGRNLLTQLGCTLNF  
>55835\_46 0.2  
PQITLWQRPIVPIKIGGQIKEALLDTGADDTILEDINLPGKWKPKLAGGIGGFIVRQYDQIPVEICGHKAIGTVLVG  
PTPVNIIGRNLLTQLGCTLNF  
>68210\_0 0.2  
PQITLWQRPLVSVKVGQIKEALLDTGADDTILEEMNLPGRWKPKMAGGIGGFIVRQYDNILIEICGHKAIGTVLVG  
PTPVNIIGRNLLTQIGCTLNF  
>68210\_1 0.2  
PQITLWQRPLVSVKVGQIKEALLDTGADDTILEEMNLPGRWKPKIAGGIGGFIVRQYDNILIEICGHKAIGTVLVG  
PTPVNIIGRNLLTQIGCTLNF  
>102782\_3 0.3  
PQITLWQRPIVTIKVEGQLKEALLDTGADDTVLEDMNLPGRWKPKMIGGLGGFIVRQYDQIHIEICGHKAIGTVLVG

PTPVNIIGRSMLTQIGCTLNF  
>102782\_8 0.3  
PQITLWQRPIVTIKVEGQLKEALLDTGADDTVLEDVNLPGRWKPKMIGGLGGFIKVRQYDQIHIEICGHKAIGTVLVG  
PTPVNIIGRNMLTQIGCTLNF  
>102782\_9 0.3  
PQITLWQRPIVTIKVEGQLKEALLDTGADDTVLEDVNLPGRWKPKMIGGLGGFIKVRQYDQIHIEICGHKAIGTVLVG  
PTPVNIIGRSMLTQIGCTLNF  
>102782\_10 0.3  
PQITLWQRPIVTIKVEGQLKEALLDTGADDTVLEDVNLPGRWKPKMIGGLGGFIKVRQYDQIHIEICGHKAIGTVLIG  
PTPVNIIGRNMLTQIGCTLNF  
>102782\_11 0.3  
PQITLWQRPIVTIKVEGQLKEALLDTGADDTVLEDVNLPGRWKPKMIGGLGGFIKVRQYDQIHIEICGHKAIGTVLIG  
PTPVNIIGRSMLTQIGCTLNF  
>102782\_136 0.3  
PQITLWQRPIVTIKVEGQLTEALLDTGADDTVLEDVNLPGRWKPKMIGGLGGFIKVRQYDQIHIEICGHKAIGTVLVG  
PTPVNIIGRNMLTQIGCTLNF  
>102782\_137 0.3  
PQITLWQRPIVTIKVEGQLTEALLDTGADDTVLEDVNLPGRWKPKMIGGLGGFIKVRQYDQIHIEICGHKAIGTVLVG  
PTPVNIIGRSMLTQIGCTLNF  
>102782\_138 0.3  
PQITLWQRPIVTIKVEGQLTEALLDTGADDTVLEDVNLPGRWKPKMIGGLGGFIKVRQYDQIHIEICGHKAIGTVLIG  
PTPVNIIGRNMLTQIGCTLNF  
>102782\_139 0.3  
PQITLWQRPIVTIKVEGQLTEALLDTGADDTVLEDVNLPGRWKPKMIGGLGGFIKVRQYDQIHIEICGHKAIGTVLIG  
PTPVNIIGRSMLTQIGCTLNF  
>102782\_144 0.3  
PQITLWQRPIVTIKVEGQLTEALLDTGADDTVLEDVNLPGRWKPKMIGGLGGFIKVRQYDQIHIEICGHKAIGTVLVG  
PTPVNIIGRNMLTQIGCTLNF  
>55835\_17 0.2  
PQITLWQRPLVSIKIGGQIKEALLDTGADDTILEDINLPGRWKPKMAGGIGGGFIKVRQYDQIPVEICGHKVIGTVLVG  
PTPVNIIGRNLLTQLGCTLNF  
>55835\_19 0.2  
PQITLWQRPLVSIKIGGQIKEALLDTGADDTILEDINLPGRWKPKMAGGIGGGFIKVRQYDQIPVEICGHKVIGTVLVG  
PTPVNIIGRNLLTQLGCTLNF  
>55835\_21 0.2  
PQITLWQRPLVSIKIGGQIKEALLDTGADDTILEDINLPGRWKPKLAGGIGGGFIKVRQYDQIPVEICGHKVIGTVLVG  
PTPVNIIGRNLLTQLGCTLNF  
>55835\_23 0.2  
PQITLWQRPLVSIKIGGQIKEALLDTGADDTILEDINLPGRWKPKLAGGIGGGFIKVRQYDQIPVEICGHKVIGTVLVG  
PTPVNIIGRNLLTQLGCTLNF  
>55835\_25 0.2  
PQITLWQRPLVSIKIGGQIKEALLDTGADDTILEDINLPGRWKPKMAGGIGGGFIKVRQYDQIPVEICGHKVIGTVLVG  
PTPVNIIGRNLLTQLGCTLNF  
>55835\_27 0.2  
PQITLWQRPLVSIKIGGQIKEALLDTGADDTILEDINLPGRWKPKMAGGIGGGFIKVRQYDQIPVEICGHKVIGTVLVG  
PTPVNIIGRNLLTQLGCTLNF  
>55835\_29 0.2  
PQITLWQRPLVSIKIGGQIKEALLDTGADDTILEDINLPGRWKPKLAGGIGGGFIKVRQYDQIPVEICGHKVIGTVLVG  
PTPVNIIGRNLLTQLGCTLNF  
>55835\_31 0.2  
PQITLWQRPLVSIKIGGQIKEALLDTGADDTILEDINLPGRWKPKMAGGIGGGFIKVRQYDQIPVEICGHKVIGTVLVG  
PTPVNIIGRNLLTQLGCTLNF  
>55835\_49 0.2  
PQITLWQRPIVSIKIGGQIKEALLDTGADDTILEDINLPGRWKPKMAGGIGGGFIKVRQYDQIPVEICGHKVIGTVLVG  
PTPVNIIGRNLLTQLGCTLNF  
>55835\_51 0.2  
PQITLWQRPIVSIKIGGQIKEALLDTGADDTILEDINLPGRWKPKLAGGIGGGFIKVRQYDQIPVEICGHKVIGTVLVG  
PTPVNIIGRNLLTQLGCTLNF  
>55835\_53 0.2  
PQITLWQRPIVSIKIGGQIKEALLDTGADDTILEDINLPGRWKPKLAGGIGGGFIKVRQYDQIPVEICGHKVIGTVLVG  
PTPVNIIGRNLLTQLGCTLNF  
>55835\_55 0.2  
PQITLWQRPIVSIKIGGQIKEALLDTGADDTILEDINLPGRWKPKLAGGIGGGFIKVRQYDQIPVEICGHKVIGTVLVG

PTPVNIIGRNLLTQLGCTLNF  
>55835\_57 0.2  
PQITLWQRPIVSIKIGGQIKEALLDTGADDTILEDINLPGKWKPKMAGGIGGFIKVRQYDQIPVEICGHKVIGTVLVG  
PTPVNIIGRNLLTQLGCTLNF  
>55835\_59 0.2  
PQITLWQRPIVSIKIGGQIKEALLDTGADDTILEDINLPGKWKPKMAGGIGGFIKVRQYDQIPVEICGHKVIGTVLVG  
PTPVNIIGRNLLTQLGCTLNF  
>55835\_61 0.2  
PQITLWQRPIVSIKIGGQIKEALLDTGADDTILEDINLPGKWKPKLAGGIGGFIKVRQYDQIPVEICGHKVIGTVLVG  
PTPVNIIGRNLLTQLGCTLNF  
>55835\_63 0.2  
PQITLWQRPIVSIKIGGQIKEALLDTGADDTILEDINLPGKWKPKLAGGIGGFIKVRQYDQIPVEICGHKVIGTVLVG  
PTPVNIIGRNLLTQLGCTLNF  
>55835\_16 0.2  
PQITLWQRPLVSIKIGGQIKEALLDTGADDTILEDINLPGRWKPKMAGGIGGFIKVRQYDQIPVEICGHKAIGTVLVG  
PTPVNIIGRNLLTQLGCTLNF  
>55835\_18 0.2  
PQITLWQRPLVSIKIGGQIKEALLDTGADDTILEDINLPGRWKPKMAGGIGGFIKVRQYDQIPVEICGHKAIGTVLVG  
PTPVNIIGRNLLTQLGCTLNF  
>55835\_20 0.2  
PQITLWQRPLVSIKIGGQIKEALLDTGADDTILEDINLPGRWKPKLAGGIGGFIKVRQYDQIPVEICGHKAIGTVLVG  
PTPVNIIGRNLLTQLGCTLNF  
>55835\_22 0.2  
PQITLWQRPLVSIKIGGQIKEALLDTGADDTILEDINLPGRWKPKLAGGIGGFIKVRQYDQIPVEICGHKAIGTVLVG  
PTPVNIIGRNLLTQLGCTLNF  
>55835\_24 0.2  
PQITLWQRPLVSIKIGGQIKEALLDTGADDTILEDINLPGKWKPKMAGGIGGFIKVRQYDQIPVEICGHKAIGTVLVG  
PTPVNIIGRNLLTQLGCTLNF  
>55835\_26 0.2  
PQITLWQRPLVSIKIGGQIKEALLDTGADDTILEDINLPGKWKPKMAGGIGGFIKVRQYDQIPVEICGHKAIGTVLVG  
PTPVNIIGRNLLTQLGCTLNF  
>55835\_28 0.2  
PQITLWQRPLVSIKIGGQIKEALLDTGADDTILEDINLPGKWKPKLAGGIGGFIKVRQYDQIPVEICGHKAIGTVLVG  
PTPVNIIGRNLLTQLGCTLNF  
>55835\_30 0.2  
PQITLWQRPLVSIKIGGQIKEALLDTGADDTILEDINLPGKWKPKLAGGIGGFIKVRQYDQIPVEICGHKAIGTVLVG  
PTPVNIIGRNLLTQLGCTLNF  
>55835\_48 0.2  
PQITLWQRPIVSIKIGGQIKEALLDTGADDTILEDINLPGRWKPKMAGGIGGFIKVRQYDQIPVEICGHKAIGTVLVG  
PTPVNIIGRNLLTQLGCTLNF  
>55835\_50 0.2  
PQITLWQRPIVSIKIGGQIKEALLDTGADDTILEDINLPGRWKPKMAGGIGGFIKVRQYDQIPVEICGHKAIGTVLVG  
PTPVNIIGRNLLTQLGCTLNF  
>55835\_52 0.2  
PQITLWQRPIVSIKIGGQIKEALLDTGADDTILEDINLPGRWKPKLAGGIGGFIKVRQYDQIPVEICGHKAIGTVLVG  
PTPVNIIGRNLLTQLGCTLNF  
>55835\_54 0.2  
PQITLWQRPIVSIKIGGQIKEALLDTGADDTILEDINLPGRWKPKLAGGIGGFIKVRQYDQIPVEICGHKAIGTVLVG  
PTPVNIIGRNLLTQLGCTLNF  
>55835\_56 0.2  
PQITLWQRPIVSIKIGGQIKEALLDTGADDTILEDINLPGKWKPKMAGGIGGFIKVRQYDQIPVEICGHKAIGTVLVG  
PTPVNIIGRNLLTQLGCTLNF  
>55835\_58 0.2  
PQITLWQRPIVSIKIGGQIKEALLDTGADDTILEDINLPGKWKPKMAGGIGGFIKVRQYDQIPVEICGHKAIGTVLVG  
PTPVNIIGRNLLTQLGCTLNF  
>55835\_60 0.2  
PQITLWQRPIVSIKIGGQIKEALLDTGADDTILEDINLPGKWKPKLAGGIGGFIKVRQYDQIPVEICGHKAIGTVLVG  
PTPVNIIGRNLLTQLGCTLNF  
>55835\_62 0.2  
PQITLWQRPIVSIKIGGQIKEALLDTGADDTILEDINLPGKWKPKLAGGIGGFIKVRQYDQIPVEICGHKAIGTVLVG  
PTPVNIIGRNLLTQLGCTLNF  
>75096\_0 0.2  
PQITLWQRPLVTIKIGGQLKEALLDTGADDTILEEMNLPGRWKPKMVGIGGFIKVRQYDEIPIEICGHKAIGTVLVG

PTPANIIGRNLLTQLGCTLNF

>41547\_0 0.2

PQITLWQRPLVTIKIGGQLKEALLDTGADDTVLEEMNLPGRWKPKMIGGIGGFIKVRQYDQILVEICGHKAMGTVLVG  
PTPVNIIGRNLLTQIGCTLNF

>44074\_0 0.1

PQITLWQRPLVTVKIGGQLKEALLDTGADDTVLEEMDLPGRWKPKMIGGIGGFIKVRQYDQILIEICGHRAIGTVLVG  
PTPVNIIGRNLLTQIGCTLNF

>44074\_1 0.1

PQITLWQRPLVTVRIGGQLKEALLDTGADDTVLEEMDLPGRWKPKMIGGIGGFIKVRQYDQILIEICGHRAIGTVLVG  
PTPVNIIGRNLLTQIGCTLNF

### Sequences for the TPV-resistant ensemble

>103779\_0 200.0

PQITLWQRPIIKVKIGGQLVEALLDTGADDTILEGINLPGRWKPKIVGGIGGFMKVKEYDQIPVEICGHKIISTVLVG  
PTPVNIIGRNVMTQIGCTLNF

>103779\_1 200.0

PQITLWQRPIIKVKIGGQLVEALLDTGADDTILEGINLPGRWKPKIVGGIGGFMKVKEYDQIPVEICGHKIISTVLVG  
PTPVNVIGRNVMTQIGCTLNF

>103779\_2 200.0

PQITLWQRPIIKVKIGGQLVEALLDTGADDTILEGINLPGRWKPKIVGGIGGFMKVKEYDQIPVEICGHKVISTVLVG  
PTPVNIIGRNVMTQIGCTLNF

>103779\_3 200.0

PQITLWQRPIIKVKIGGQLVEALLDTGADDTILEGINLPGRWKPKIVGGIGGFMKVKEYDQIPVEICGHKVISTVLVG  
PTPVNVIGRNVMTQIGCTLNF

>103779\_4 200.0

PQITLWQRPIIKVKIGGQLVEALLDTGADDTILEGIDLPGRWKPKIVGGIGGFMKVKEYDQIPVEICGHKIISTVLVG  
PTPVNIIGRNVMTQIGCTLNF

>103779\_5 200.0

PQITLWQRPIIKVKIGGQLVEALLDTGADDTILEGIDLPGRWKPKIVGGIGGFMKVKEYDQIPVEICGHKIISTVLVG  
PTPVNVIGRNVMTQIGCTLNF

>103779\_6 200.0

PQITLWQRPIIKVKIGGQLVEALLDTGADDTILEGIDLPGRWKPKIVGGIGGFMKVKEYDQIPVEICGHKVISTVLVG  
PTPVNIIGRNVMTQIGCTLNF

>103779\_7 200.0

PQITLWQRPIIKVKIGGQLVEALLDTGADDTILEGIDLPGRWKPKIVGGIGGFMKVKEYDQIPVEICGHKVISTVLVG  
PTPVNVIGRNVMTQIGCTLNF

>103779\_8 200.0

PQITLWQRPIIKVKIGGQLVEALLDTGADDTIFEGINLPGRWKPKIVGGIGGFMKVKEYDQIPVEICGHKIISTVLVG  
PTPVNIIGRNVMTQIGCTLNF

>103779\_9 200.0

PQITLWQRPIIKVKIGGQLVEALLDTGADDTIFEGINLPGRWKPKIVGGIGGFMKVKEYDQIPVEICGHKIISTVLVG  
PTPVNVIGRNVMTQIGCTLNF

>103779\_10 200.0

PQITLWQRPIIKVKIGGQLVEALLDTGADDTIFEGINLPGRWKPKIVGGIGGFMKVKEYDQIPVEICGHKVISTVLVG  
PTPVNIIGRNVMTQIGCTLNF

>103779\_11 200.0

PQITLWQRPIIKVKIGGQLVEALLDTGADDTIFEGINLPGRWKPKIVGGIGGFMKVKEYDQIPVEICGHKVISTVLVG  
PTPVNVIGRNVMTQIGCTLNF

>103779\_12 200.0

PQITLWQRPIIKVKIGGQLVEALLDTGADDTIFEGIDLPGRWKPKIVGGIGGFMKVKEYDQIPVEICGHKIISTVLVG  
PTPVNIIGRNVMTQIGCTLNF

>103779\_13 200.0

PQITLWQRPIIKVKIGGQLVEALLDTGADDTIFEGIDLPGRWKPKIVGGIGGFMKVKEYDQIPVEICGHKIISTVLVG  
PTPVNVIGRNVMTQIGCTLNF

>103779\_14 200.0

PQITLWQRPIIKVKIGGQLVEALLDTGADDTIFEGIDLPGRWKPKIVGGIGGFMKVKEYDQIPVEICGHKVISTVLVG  
PTPVNIIGRNVMTQIGCTLNF

>103779\_15 200.0

PQITLWQRPIIKVKIGGQLVEALLDTGADDTIFEGIDLPGRWKPKIVGGIGGFMKVKEYDQIPVEICGHKVISTVLVG  
PTPVNVIGRNVMTQIGCTLNF

>147550\_0 200.0

PQITLWQRPIIKVKIGGQLVEALLDTGADDTIFEGIDLPGRWKPKIVGGIGGFMKVKEYDQIPVEICGHKVISTVLVG  
PTPVNVIGRNVMTQIGCTLNF



>117063\_1 200.0  
PQITLWQRPVVTVKVAGQLREALDGTGADDTIFEENLPGRWTPKIVGGIGGFMKVVRQYDQPIEICGHKVISTVLVG  
PTPTNIIGGNLMTQIGCTLNF

>123049\_0 200.0  
PQITLWQRPIITIKIGGQLKDVLMMDTGADDTVLEDIDLPGRWPKLIGGIGGFVKVVRQYDHPVVEVCGHKVTTTTVLVG  
PTPVDVIGRNLLTQIGCTLNF

>123049\_1 200.0  
PQITLWQRPIITIKIGGQLKDVLMMDTGADDTVLEDIDLPGRWPKLIGGIGGFVKVVRQYDNPVVEVCGHKVTTTTVLVG  
PTPVDVIGRNLLTQIGCTLNF

>123049\_2 200.0  
PQITLWQRPIITIKIGGQLKDVLMMDTGADDTVLEDIDLPGRWPKLIGGIGGFVKVQYDHPVVEVCGHKVTTTTVLVG  
PTPVDVIGRNLLTQIGCTLNF

>115065\_2 200.0  
PQITLWQRPVVTVKIAGQLKEALIDTGADDTIFFEMNLPGRWPKLIGGIGGFVKVVRQYDQPIEICGHKVVGTVLIG  
PTPTNVIGRNLLTQIGCTLNF

>115065\_3 200.0  
PQITLWQRPVVTVKIAGQLKEALIDTGADDTIFFEMDLPGRWPKLIGGIGGFVKVVRQYDQPIEICGHKVVGTVLIG  
PTPTNVIGRNLLTQIGCTLNF

>117119\_0 200.0  
PQITLWQRPIVTVKIAGQLKEALLDTGADDTVFEEMNLPGRWTPKLIGGIGGFVKVVRQYDQPIEICGHKVIGPVLVG  
PTPANVIGRNLMSEQIGCTLNF

>117119\_1 200.0  
PQITLWQRPIVTVKIAGQLKEALLDTGADDTVFEEMNLPGRWTPKLIGGIGGFVKVVRQYDQVPIEICGHKVIGPVLVG  
PTPANVIGRNLMSEQIGCTLNF

>117119\_2 200.0  
PQITLWQRPIVTVRIAGQLKEALLDTGADDTVFEEMNLPGRWTPKLIGGIGGFVKVVRQYDQPIEICGHKVIGPVLVG  
PTPANVIGRNLMSEQIGCTLNF

>117119\_3 200.0  
PQITLWQRPIVTVRIAGQLKEALLDTGADDTVFEEMNLPGRWTPKLIGGIGGFVKVVRQYDQVPIEICGHKVIGPVLVG  
PTPANVIGRNLMSEQIGCTLNF

>116529\_1 200.0  
PQITLWQRPIVTVKIGGQVKEALLDTGADDTVFEEMNLPGRWPKMIGGIGGFVKVVRQYDQPIEICGHKVIGPVLVG  
PTPLNVIGRNLMTQMGCTLNF

>116529\_2 200.0  
PQITLWQRPIVTVKIGGQVKEALLDTGADDTVFEEMNLPGRWPKMIGGIGGFVKVVRQYDQVPIEICGHKVIGPVLVG  
PTPLNVIGRNLMTQIGCTLNF

>116529\_3 200.0  
PQITLWQRPIVTVKIGGQVKEALLDTGADDTVFEEMNLPGRWPKMIGGIGGFVKVVRQYDQVPIEICGHKVIGPVLVG  
PTPLNVIGRNLMTQMGCTLNF

>116529\_4 200.0  
PQITLWQRPIVTVKIGGQVKEALLDTGADDTVFEEMNLPGRWPKRMIGGIGGFVKVVRQYDQPIEICGHKVIGPVLVG  
PTPLNVIGRNLMTQIGCTLNF

>116529\_5 200.0  
PQITLWQRPIVTVKIGGQVKEALLDTGADDTVFEEMNLPGRWPKRMIGGIGGFVKVVRQYDQPIEICGHKVIGPVLVG  
PTPLNVIGRNLMTQMGCTLNF

>116529\_6 200.0  
PQITLWQRPIVTVKIGGQVKEALLDTGADDTVFEEMNLPGRWPKRMIGGIGGFVKVVRQYDQVPIEICGHKVIGPVLVG  
PTPLNVIGRNLMTQIGCTLNF

>116529\_7 200.0  
PQITLWQRPIVTVKIGGQVKEALLDTGADDTVFEEMNLPGRWPKRMIGGIGGFVKVVRQYDQVPIEICGHKVIGPVLVG  
PTPLNVIGRNLMTQMGCTLNF

>116529\_8 200.0  
PQITLWQRPIVTVKIGGQVKEALLDTGADDTVFEEMNLPGRWTPKMIGGIGGFVKVVRQYDQPIEICGHKVIGPVLVG  
PTPLNVIGRNLMTQIGCTLNF

>116529\_9 200.0  
PQITLWQRPIVTVKIGGQVKEALLDTGADDTVFEEMNLPGRWTPKMIGGIGGFVKVVRQYDQPIEICGHKVIGPVLVG  
PTPLNVIGRNLMTQMGCTLNF

>116529\_10 200.0  
PQITLWQRPIVTVKIGGQVKEALLDTGADDTVFEEMNLPGRWTPKMIGGIGGFVKVVRQYDQVPIEICGHKVIGPVLVG  
PTPLNVIGRNLMTQIGCTLNF

>116529\_11 200.0  
PQITLWQRPIVTVKIGGQVKEALLDTGADDTVFEEMNLPGRWTPKMIGGIGGFVKVVRQYDQVPIEICGHKVIGPVLVG  
PTPLNVIGRNLMTQMGCTLNF

>116529\_12 200.0  
PQITLWQRPIVTVKIGGQVKEALLDTGADDTVFEEMNLPGRWTPRMIGGIGGFVKVRQYDQIPIEICGHKVIGPVLVG  
PTPLNVIGRNLMTQIGCTLNF  
>116529\_13 200.0  
PQITLWQRPIVTVKIGGQVKEALLDTGADDTVFEEMNLPGRWTPRMIGGIGGFVKVRQYDQIPIEICGHKVIGPVLVG  
PTPLNVIGRNLMTQMGCTLNF  
>116529\_14 200.0  
PQITLWQRPIVTVKIGGQVKEALLDTGADDTVFEEMNLPGRWTPRMIGGIGGFVKVRQYDQVPIEICGHKVIGPVLVG  
PTPLNVIGRNLMTQIGCTLNF  
>116529\_15 200.0  
PQITLWQRPIVTVKIGGQVKEALLDTGADDTVFEEMNLPGRWTPRMIGGIGGFVKVRQYDQVPIEICGHKVIGPVLVG  
PTPLNVIGRNLMTQMGCTLNF  
>116529\_16 200.0  
PQITLWQRPIVTVKVGGQVKEALLDTGADDTVFEEMNLPGRWKPKMIGGIGGFVKVRQYDQIPIEICGHKVIGPVLVG  
PTPLNVIGRNLMTQIGCTLNF  
>116529\_17 200.0  
PQITLWQRPIVTVKVGGQVKEALLDTGADDTVFEEMNLPGRWKPKMIGGIGGFVKVRQYDQIPIEICGHKVIGPVLVG  
PTPLNVIGRNLMTQMGCTLNF  
>116529\_18 200.0  
PQITLWQRPIVTVKVGGQVKEALLDTGADDTVFEEMNLPGRWKPKMIGGIGGFVKVRQYDQVPIEICGHKVIGPVLVG  
PTPLNVIGRNLMTQIGCTLNF  
>116529\_19 200.0  
PQITLWQRPIVTVKVGGQVKEALLDTGADDTVFEEMNLPGRWKPKMIGGIGGFVKVRQYDQVPIEICGHKVIGPVLVG  
PTPLNVIGRNLMTQMGCTLNF  
>116529\_20 200.0  
PQITLWQRPIVTVKVGGQVKEALLDTGADDTVFEEMNLPGRWKPRMIGGIGGFVKVRQYDQIPIEICGHKVIGPVLVG  
PTPLNVIGRNLMTQIGCTLNF  
>116529\_21 200.0  
PQITLWQRPIVTVKVGGQVKEALLDTGADDTVFEEMNLPGRWKPRMIGGIGGFVKVRQYDQIPIEICGHKVIGPVLVG  
PTPLNVIGRNLMTQMGCTLNF  
>116529\_22 200.0  
PQITLWQRPIVTVKVGGQVKEALLDTGADDTVFEEMNLPGRWKPRMIGGIGGFVKVRQYDQVPIEICGHKVIGPVLVG  
PTPLNVIGRNLMTQIGCTLNF  
>116529\_23 200.0  
PQITLWQRPIVTVKVGGQVKEALLDTGADDTVFEEMNLPGRWKPRMIGGIGGFVKVRQYDQVPIEICGHKVIGPVLVG  
PTPLNVIGRNLMTQMGCTLNF  
>116529\_24 200.0  
PQITLWQRPIVTVKVGGQVKEALLDTGADDTVFEEMNLPGRWTPKMIGGIGGFVKVRQYDQIPIEICGHKVIGPVLVG  
PTPLNVIGRNLMTQIGCTLNF  
>116529\_25 200.0  
PQITLWQRPIVTVKVGGQVKEALLDTGADDTVFEEMNLPGRWTPKMIGGIGGFVKVRQYDQIPIEICGHKVIGPVLVG  
PTPLNVIGRNLMTQMGCTLNF  
>116529\_26 200.0  
PQITLWQRPIVTVKVGGQVKEALLDTGADDTVFEEMNLPGRWTPKMIGGIGGFVKVRQYDQVPIEICGHKVIGPVLVG  
PTPLNVIGRNLMTQIGCTLNF  
>116529\_27 200.0  
PQITLWQRPIVTVKVGGQVKEALLDTGADDTVFEEMNLPGRWTPKMIGGIGGFVKVRQYDQVPIEICGHKVIGPVLVG  
PTPLNVIGRNLMTQMGCTLNF  
>116529\_28 200.0  
PQITLWQRPIVTVKVGGQVKEALLDTGADDTVFEEMNLPGRWTPRMIGGIGGFVKVRQYDQIPIEICGHKVIGPVLVG  
PTPLNVIGRNLMTQIGCTLNF  
>116529\_29 200.0  
PQITLWQRPIVTVKVGGQVKEALLDTGADDTVFEEMNLPGRWTPRMIGGIGGFVKVRQYDQIPIEICGHKVIGPVLVG  
PTPLNVIGRNLMTQMGCTLNF  
>116529\_30 200.0  
PQITLWQRPIVTVKVGGQVKEALLDTGADDTVFEEMNLPGRWTPRMIGGIGGFVKVRQYDQVPIEICGHKVIGPVLVG  
PTPLNVIGRNLMTQIGCTLNF  
>116529\_31 200.0  
PQITLWQRPIVTVKVGGQVKEALLDTGADDTVFEEMNLPGRWTPRMIGGIGGFVKVRQYDQVPIEICGHKVIGPVLVG  
PTPLNVIGRNLMTQMGCTLNF  
>113056\_13 200.0  
PQITLWQRPIVTVKIGGQLKEALLDTGADDTVFEENVNLPGRWKPKLIGGIGGFVKVREYEQVPIEVCGHKMMGTVLIG  
PTPTNVIGRNMLTQLGCTLNF

>113056\_14 200.0  
PQITLWQRPIVTVKIGGQLKEALLDTGADDTVFEEVNLPGRWPKKLIGGIGGFVKVREYEQVPIEVCGHTMIGTVLIG  
PTPTNVIGRNMLTQLGCTLNF

>113056\_15 200.0  
PQITLWQRPIVTVKIGGQLKEALLDTGADDTVFEEVNLPGRWPKKLIGGIGGFVKVREYEQVPIEVCGHTMMGTVLIG  
PTPTNVIGRNMLTQLGCTLNF

>113056\_16 200.0  
PQITLWQRPIVTVKIGGQLKEALLDTGADDTVFDEMNLPGRWPKKLIGGIGGFVKVREYEQVPIEICGHKMIGTVLIG  
PTPTNVIGRNMLTQLGCTLNF

>113056\_17 200.0  
PQITLWQRPIVTVKIGGQLKEALLDTGADDTVFDEMNLPGRWPKKLIGGIGGFVKVREYEQVPIEICGHKMMGTVLIG  
PTPTNVIGRNMLTQLGCTLNF

>113056\_18 200.0  
PQITLWQRPIVTVKIGGQLKEALLDTGADDTVFDEMNLPGRWPKKLIGGIGGFVKVREYEQVPIEICGHTMIGTVLIG  
PTPTNVIGRNMLTQLGCTLNF

>113056\_19 200.0  
PQITLWQRPIVTVKIGGQLKEALLDTGADDTVFDEMNLPGRWPKKLIGGIGGFVKVREYEQVPIEICGHTMMGTVLIG  
PTPTNVIGRNMLTQLGCTLNF

>113056\_20 200.0  
PQITLWQRPIVTVKIGGQLKEALLDTGADDTVFDEMNLPGRWPKKLIGGIGGFVKVREYEQVPIEVCGHKMIGTVLIG  
PTPTNVIGRNMLTQLGCTLNF

>113056\_21 200.0  
PQITLWQRPIVTVKIGGQLKEALLDTGADDTVFDEMNLPGRWPKKLIGGIGGFVKVREYEQVPIEVCGHKMMGTVLIG  
PTPTNVIGRNMLTQLGCTLNF

>113056\_22 200.0  
PQITLWQRPIVTVKIGGQLKEALLDTGADDTVFDEMNLPGRWPKKLIGGIGGFVKVREYEQVPIEVCGHTMIGTVLIG  
PTPTNVIGRNMLTQLGCTLNF

>113056\_23 200.0  
PQITLWQRPIVTVKIGGQLKEALLDTGADDTVFDEMNLPGRWPKKLIGGIGGFVKVREYEQVPIEVCGHTMMGTVLIG  
PTPTNVIGRNMLTQLGCTLNF

>113056\_24 200.0  
PQITLWQRPIVTVKIGGQLKEALLDTGADDTVFDEVNLPGRWPKKLIGGIGGFVKVREYEQVPIEICGHKMIGTVLIG  
PTPTNVIGRNMLTQLGCTLNF

>113056\_25 200.0  
PQITLWQRPIVTVKIGGQLKEALLDTGADDTVFDEVNLPGRWPKKLIGGIGGFVKVREYEQVPIEICGHKMMGTVLIG  
PTPTNVIGRNMLTQLGCTLNF

>113056\_26 200.0  
PQITLWQRPIVTVKIGGQLKEALLDTGADDTVFDEVNLPGRWPKKLIGGIGGFVKVREYEQVPIEICGHTMIGTVLIG  
PTPTNVIGRNMLTQLGCTLNF

>113056\_27 200.0  
PQITLWQRPIVTVKIGGQLKEALLDTGADDTVFDEVNLPGRWPKKLIGGIGGFVKVREYEQVPIEICGHTMMGTVLIG  
PTPTNVIGRNMLTQLGCTLNF

>113056\_28 200.0  
PQITLWQRPIVTVKIGGQLKEALLDTGADDTVFDEVNLPGRWPKKLIGGIGGFVKVREYEQVPIEVCGHKMIGTVLIG  
PTPTNVIGRNMLTQLGCTLNF

>113056\_29 200.0  
PQITLWQRPIVTVKIGGQLKEALLDTGADDTVFDEVNLPGRWPKKLIGGIGGFVKVREYEQVPIEVCGHKMMGTVLIG  
PTPTNVIGRNMLTQLGCTLNF

>113056\_30 200.0  
PQITLWQRPIVTVKIGGQLKEALLDTGADDTVFDEVNLPGRWPKKLIGGIGGFVKVREYEQVPIEVCGHTMIGTVLIG  
PTPTNVIGRNMLTQLGCTLNF

>113056\_31 200.0  
PQITLWQRPIVTVKIGGQLKEALLDTGADDTVFDEVNLPGRWPKKLIGGIGGFVKVREYEQVPIEVCGHTMMGTVLIG  
PTPTNVIGRNMLTQLGCTLNF

>113056\_32 200.0  
PQITLWQRPVVTVKIGGQLKEALLDTGADDTVFEEVNLPGRWPKKLIGGIGGFVKVREYEQVPIEICGHKMIGTVLIG  
PTPTNVIGRNMLTQLGCTLNF

>113056\_33 200.0  
PQITLWQRPVVTVKIGGQLKEALLDTGADDTVFEEVNLPGRWPKKLIGGIGGFVKVREYEQVPIEICGHKMMGTVLIG  
PTPTNVIGRNMLTQLGCTLNF

>113056\_34 200.0  
PQITLWQRPVVTVKIGGQLKEALLDTGADDTVFEEVNLPGRWPKKLIGGIGGFVKVREYEQVPIEICGHTMIGTVLIG  
PTPTNVIGRNMLTQLGCTLNF

>113056\_35 200.0  
PQITLWQRPVVTVKIGGQLKEALLDTGADDTVFEEMNLPGRWKPKLIGGIGGFVKVREYEQVPIEICGHTMMGTVLIG  
PTPTNVIGRNMLTQLGCTLNF

>113056\_36 200.0  
PQITLWQRPVVTVKIGGQLKEALLDTGADDTVFEEMNLPGRWKPKLIGGIGGFVKVREYEQVPIEVCGHKMIGTVLIG  
PTPTNVIGRNMLTQLGCTLNF

>113056\_37 200.0  
PQITLWQRPVVTVKIGGQLKEALLDTGADDTVFEEMNLPGRWKPKLIGGIGGFVKVREYEQVPIEVCGHKMMGTVLIG  
PTPTNVIGRNMLTQLGCTLNF

>113056\_38 200.0  
PQITLWQRPVVTVKIGGQLKEALLDTGADDTVFEEMNLPGRWKPKLIGGIGGFVKVREYEQVPIEVCGHTMIGTVLIG  
PTPTNVIGRNMLTQLGCTLNF

>113056\_39 200.0  
PQITLWQRPVVTVKIGGQLKEALLDTGADDTVFEEMNLPGRWKPKLIGGIGGFVKVREYEQVPIEVCGHTMMGTVLIG  
PTPTNVIGRNMLTQLGCTLNF

>113056\_40 200.0  
PQITLWQRPVVTVKIGGQLKEALLDTGADDTVFEEMNLPGRWKPKLIGGIGGFVKVREYEQVPIEVCGHTMMGTVLIG  
PTPTNVIGRNMLTQLGCTLNF

>113056\_41 200.0  
PQITLWQRPVVTVKIGGQLKEALLDTGADDTVFEEMNLPGRWKPKLIGGIGGFVKVREYEQVPIEICGHKMIGTVLIG  
PTPTNVIGRNMLTQLGCTLNF

>113056\_42 200.0  
PQITLWQRPVVTVKIGGQLKEALLDTGADDTVFEEMNLPGRWKPKLIGGIGGFVKVREYEQVPIEICGHKMMGTVLIG  
PTPTNVIGRNMLTQLGCTLNF

>113056\_43 200.0  
PQITLWQRPVVTVKIGGQLKEALLDTGADDTVFEEMNLPGRWKPKLIGGIGGFVKVREYEQVPIEICGHTMIGTVLIG  
PTPTNVIGRNMLTQLGCTLNF

>113056\_44 200.0  
PQITLWQRPVVTVKIGGQLKEALLDTGADDTVFEEMNLPGRWKPKLIGGIGGFVKVREYEQVPIEVCGHKMIGTVLIG  
PTPTNVIGRNMLTQLGCTLNF

>113056\_45 200.0  
PQITLWQRPVVTVKIGGQLKEALLDTGADDTVFEEMNLPGRWKPKLIGGIGGFVKVREYEQVPIEVCGHKMMGTVLIG  
PTPTNVIGRNMLTQLGCTLNF

>113056\_46 200.0  
PQITLWQRPVVTVKIGGQLKEALLDTGADDTVFEEMNLPGRWKPKLIGGIGGFVKVREYEQVPIEVCGHTMIGTVLIG  
PTPTNVIGRNMLTQLGCTLNF

>113056\_47 200.0  
PQITLWQRPVVTVKIGGQLKEALLDTGADDTVFEEMNLPGRWKPKLIGGIGGFVKVREYEQVPIEVCGHTMMGTVLIG  
PTPTNVIGRNMLTQLGCTLNF

>113056\_48 200.0  
PQITLWQRPVVTVKIGGQLKEALLDTGADDTVFEEMNLPGRWKPKLIGGIGGFVKVREYEQVPIEICGHKMIGTVLIG  
PTPTNVIGRNMLTQLGCTLNF

>113056\_49 200.0  
PQITLWQRPVVTVKIGGQLKEALLDTGADDTVFEEMNLPGRWKPKLIGGIGGFVKVREYEQVPIEICGHKMMGTVLIG  
PTPTNVIGRNMLTQLGCTLNF

>113056\_50 200.0  
PQITLWQRPVVTVKIGGQLKEALLDTGADDTVFEEMNLPGRWKPKLIGGIGGFVKVREYEQVPIEICGHTMIGTVLIG  
PTPTNVIGRNMLTQLGCTLNF

>113056\_51 200.0  
PQITLWQRPVVTVKIGGQLKEALLDTGADDTVFEEMNLPGRWKPKLIGGIGGFVKVREYEQVPIEICGHTMMGTVLIG  
PTPTNVIGRNMLTQLGCTLNF

>113056\_52 200.0  
PQITLWQRPVVTVKIGGQLKEALLDTGADDTVFEEMNLPGRWKPKLIGGIGGFVKVREYEQVPIEVCGHKMIGTVLIG  
PTPTNVIGRNMLTQLGCTLNF

>117069\_0 200.0  
PQITLWQRPILT VKIAGQLTEALLDTGADDTIFQDINLPGRWTPKIVGGIGLLRVRQYEQVPIEVCGHKIITTVLIG  
PTPVNVLGRNLMTQLGCTLNF

>117069\_1 200.0  
PQITLWQRPILT VKVAGQLTEALLDTGADDTIFQDINLPGRWTPKIVGGIGLLRVRQYEQVPIEVCGHKIITTVLIG  
PTPVNVLGRNLMTQLGCTLNF

**Sequences for the TPV-susceptible ensemble**

>216623\_0 0.4

PQITLWQRPFVTIKIGGQLKEALLDTGADDTVLEEMALPGKWKPKMIGGIGGFIKVGQYDQITIDICGHKATGTVLIG  
PTPVNIIGRNLLTQIGCTLNF  
>148079\_0 0.5  
PQITLWQRPIVTVRIEGQLIEALLDTGADDTVLEDIDLPGNWKPKMIGGIGGFVKVRQYDQIHIEICGKRAIGSVVVG  
PTPANIIGRNILSQIGCTLNF  
>115747\_1 0.4  
PQITLWQRPIVTIKIGGQTKEALLDTGADDTVLEEMNLPGRWKPKMIVGIGGFVKVRQYDQILVEICGHKAIGTVLVG  
PTPANIIGRNLMTQIGCTLNF  
>115755\_0 0.2  
PQITLWQRPIVTIKVGGQIMEALIDTADDTVLEDINLPGRWKPKMIQGIGGLVKVRQYDQIPIEICGHEVMSTVLVG  
PTPANIIGRNLLTQIGCTLNF  
>115755\_1 0.2  
PQITLWQRPIVTIKVGGQIMEALIDTADDTVLEDINLPGRWKPKMIQGIGGLVKVRQYDQIPIEICGHEVMSTVLVG  
PTPANIIGRNLLTQMIGCTLNF  
>115755\_2 0.2  
PQITLWQRPIVTIKVGGQIMEALIDTADDTVLEDINLPGRWKPKMIQGIGGLVKVRQYDQIPIEICGHEVMSTILVG  
PTPANIIGRNLLTQIGCTLNF  
>115755\_3 0.2  
PQITLWQRPIVTIKVGGQIMEALIDTADDTVLEDINLPGRWKPKMIQGIGGLVKVRQYDQIPIEICGHEVMSTILVG  
PTPANIIGRNLLTQMIGCTLNF  
>117023\_0 0.4  
PQITLWQRPIVTIKIGGQLREALLDTGADDTVLEDIELPGRWKPKMIVGVGGFAKVRQYDQVPIEICGHKVVGTVLVG  
PTPANIIGRNLMTQLGCTLNF  
>117023\_1 0.4  
PQITLWQRPIVTIKIGGQLREALLDTGADDTVLEDIELPGRWKPKMIVGVGGFAKVKQYDQVPIEICGHKVVGTVLVG  
PTPANIIGRNLMTQLGCTLNF  
>147548\_0 0.2  
PQITLWQRPIVTIKIGGQLKEALLDTGADDTVLEDINLPGRWKPKMIVGVGGFVKVRQYDQVAIEICGHKVI GTVLVG  
PTPTNIIGRNLLTQIGCTLNF  
>75088\_0 0.4  
PQITLWQRPIVTIKIGGQLKEALLDTGADDTVLEEMNLPGRWKPKMIVGVGGFSKVRQYDQVPIEICGHKVVGSVLIG  
PTPANIIGRNLLTQLGCTLNF  
>75088\_1 0.4  
PQITLWQRPIVTIKIGGQLKEALLDTGADDTVLEEMNLPGRWKPKIIVGVGGFSKVRQYDQVPIEICGHKVVGSVLIG  
PTPANIIGRNLLTQLGCTLNF  
>75088\_2 0.4  
PQITLWQRPIVTIKIGGQLKEALLDTGADDTVLEEMNLPGRWKPKVIVGVGGFSKVRQYDQVPIEICGHKVVGSVLIG  
PTPANIIGRNLLTQLGCTLNF  
>75088\_3 0.4  
PQITLWQRPIVTIKIGGQLKEALLDTGADDTVLEEMNLPGRWKPKIIVGVGGFSKVRQYDQVPIEICGHKVVGSVLIG  
PTPANIIGRNLLTQLGCTLNF  
>75088\_4 0.4  
PQITLWQRPIVTIKIGGQLKEALLDTGADDTVLEEMNLPGRWKPKIIVGVGGFSKVRQYDQVPIEICGHKVVGSVLIG  
PTPANIIGRNLLTQLGCTLNF  
>75088\_5 0.4  
PQITLWQRPIVTIKIGGQLKEALLDTGADDTVLEEMNLPGRWKPKIIVGVGGFSKVRQYDQVPIEICGHKVVGSVLIG  
PTPANIIGRNLLTQLGCTLNF  
>148003\_4 0.5  
PQITLWQRPLVTIKIGGQLIEALLDTGADDTVLEEMDLPGKWKPKMIGGIGGFIKVRQYEQVPIEICGYKAEGTVLVG  
PTPVNIIGRNLLTQIGCTLNF  
>148003\_5 0.5  
PQITLWQRPLVTIKIGGQLIEALLDTGADDTVLEEMDLPGKWKPKMIGGIGGFIKVRQYEQVPLEICGYKAEGTVLVG  
PTPVNIIGRNLLTQIGCTLNF  
>148003\_6 0.5  
PQITLWQRPLVTIKIGGQLIEALLDTGADDTVLEEMDLPGKWKPKMIGGIGGFIKVRQYEQVPIEICGYKAEGTVLVG  
PTPVNIIGRNLLTQIGCTLNF  
>235707\_18 0.5  
PQITLWQRPLVAIKIGGQLKEALLDTGADDTVLEEMNLPGRWKPKMIGGIGGFIKVGQYDQVAIEICGHKAIGTVLVG  
PTPVNIIGRNLLTQLGCTLNF  
>116519\_0 0.3  
PQIPLWQRPFVTIKIGGQIKEALLDTGADDTVLEEMDLPGKWKPKIIGGIGGFLKVRQYDQIPIEICGHKILGTVLIG  
PTPVNIIGRGLMTQLGCTLNF  
>116519\_1 0.3

PQIPLWQRPVFTIKIGGHIKEALLDTGADDTVFQEMDLPGRWKPKIIGGIGGFLKVRQYDQIPIEICGHKILGTVLIG  
PTPVNIIGRGLMTQLGCTLNF  
>117057\_0 0.4  
PQIPLWQRPVFTIKIGGQIKEALLDTGADDTVFQEMDLPGRWKPKIIGGIGGFLKVRQYDQIPIEICGHKIIGTVLIG  
PTPVNIIGRGLMTQLGCTLNF  
>117057\_2 0.4  
PQIPLWQRPVFTIKIGGHIKEALLDTGADDTVFQEMDLPGRWKPKIIGGIGGFLKVRQYDQIPIEICGHKIIGTVLIG  
PTPVNIIGRGLMTQLGCTLNF  
>115747\_0 0.4  
PQITLWQRPIVFTIKIGGQIKEALLDTGADDTVLEEMNLPGRWKPKMIVGIGGFVKVRQYDQILVEICGHKAIGTVLVG  
PTPANIIGRNLMTQIGCTLNF  
>117139\_0 0.2  
PQITLWQRPIVFTIKIGGQLKEALLDTGADDTVLEEMDLPGRWKPKMIVGIGGLVKVRQYDQIPIEICGHKTIGTVLIG  
PTPANIIGRNLMTQLGCTLNF  
>216607\_0 0.4  
PQITLWQRPLVFTIKIGGQLKEALLDTGADDTVLEEMNLPGRWKPRMIGGIGGFIKVGQYDQMPIEICGHKTEGTVLVG  
PTPVNIIGRNLLTQIGCTLNF  
>216607\_1 0.4  
PQITLWQRPLVFTIKIGGQLKEALLDTGADDTVLEEMNLPGRWKPRMIGGIGGFIKVGQYDQMPIEICGHKTEGTVLVG  
PTPVNIIGRNLLTQMGCTLNF  
>216607\_2 0.4  
PQITLWQRPLVFTIKIGGQLKEALLDTGADDTVLEEINLPGRWKPRMIGGIGGFIKVGQYDQMPIEICGHKTEGTVLVG  
PTPVNIIGRNLLTQIGCTLNF  
>216607\_3 0.4  
PQITLWQRPLVFTIKIGGQLKEALLDTGADDTVLEEINLPGRWKPRMIGGIGGFIKVGQYDQMPIEICGHKTEGTVLVG  
PTPVNIIGRNLLTQMGCTLNF  
>81903\_0 0.3  
PQITLWQRPVFTIKVGGQLIEALLDTGADDTVLEEINLPGRWTPKIIGGVGGLIKVRQYEQVPIEICGHKVIGPVLV  
PTPVNIIGRNLMTQIGCTLNF  
>81903\_1 0.3  
PQITLWQRPVFTIKVGGQLIEALLDTGADDTVLEEINLPGRWTPKIIGGVGGLLKVVRQYEQVPIEICGHKVIGPVLV  
PTPVNIIGRNLMTQIGCTLNF  
>109470\_1 0.4  
PQITLWQRPLVFTIKIGGQLKEALLDTGADDTVLEEMNLPGRWKPKMIEGIGGFIKVRQYDEISIDICGHKAVGTVLIG  
PTPVNIIGRNLLTQIGCTLNF  
>109470\_3 0.4  
PQITLWQRPLVFTIKIGGQLKEALLDTGADDTVLEEMSLPGRWKPKMIEGIGGFIKVRQYDEISIDICGHKAVGTVLIG  
PTPVNIIGRNLLTQIGCTLNF  
>81909\_0 0.4  
PQITLWQRPLVFTIKIGGQLIEALLDTGADDTILEEINLPGRWKPKMIGGIGGFLKVRQYDQIPIEICGHKVIGTVLVG  
PTPTNIIGRNIMTQIGCTLNF  
>81909\_1 0.4  
PQITLWQRPLVFTIKIGGQLIEALLDTGADDTILEEINLPGRWKPKMIGGIGGFLKVRQYDQIPIEICGHKVIGTVLVG  
PTPTNIIGRNMMTQIGCTLNF  
>116920\_3 0.4  
PQITLWQRPLVFTIKIGGQLKEALLDTGADDTVLEEMNLPGRWKPRMIGGLGGFIKVRQYDQVPIEICGHKTVSTVLIG  
PTPANIIGRNLLTQLGCTLNF  
>235707\_6 0.5  
PQITLWQRPLVFTIKIGGQLKEALLDTGADDTVLEEMNLPGRWKPKMIGGIGGFIKVGQYDQVAIEICGHKAIGTVLVG  
PTPVNIIGRNLLTQLGCTLNF  
>235707\_7 0.5  
PQITLWQRPLVFTIKIGGQLKEALLDTGADDTVLEEMNLPGRWKPKMIGGIGGFIKVGQYDQVAIEICGHKAIGTVLIG  
PTPVNIIGRNLLTQLGCTLNF  
>235707\_24 0.5  
PQITLWQRPIVFTIKIGGQLKEALLDTGADDTVLEEMNLPGRWKPKMIGGIGGFIKVGQYDQIAIEICGHKAIGTVLVG  
PTPVNIIGRNLLTQLGCTLNF  
>235707\_25 0.5  
PQITLWQRPIVFTIKIGGQLKEALLDTGADDTVLEEMNLPGRWKPKMIGGIGGFIKVGQYDQIAIEICGHKAIGTVLIG  
PTPVNIIGRNLLTQLGCTLNF  
>235707\_30 0.5  
PQITLWQRPIVFTIKIGGQLKEALLDTGADDTVLEEMNLPGRWKPKMIGGIGGFIKVGQYDQVAIEICGHKAIGTVLVG  
PTPVNIIGRNLLTQLGCTLNF  
>235707\_31 0.5

PQITLWQRPIVTIKIGGQLKEALLDTGADDTVLEEMNLPGRWKPKMIGGIGGFIVKQYDQVAIEICGHKAIGTVLIG  
PTPVNIIGRNLLTQLGCTLNF  
>235707\_2 0.5  
PQITLWQRPLVTIKIGGQLKEALLDTGADDTVLEEMNLPGRWKPKMIGGIGGFIVKQYDQISIEICGHKAIGTVLVG  
PTPVNIIGRNLLTQLGCTLNF  
>257931\_3 0.5  
PQITLWQRPFVTVKIGGQLKEALLDTGADNTVIEDISLPGRWKPMIGGIGGFVVKVQYEQVSVEICGHKAMGTVLVG  
PTPVNIIGRNLLTKIGCTLNF  
>257931\_4 0.5  
PQITLWQRPFVTVKIGGQLKEALLDTGADNTVIEDISLPGRWKPMIGGIGGFVVKVQYEQVSVEICGHKAIGTVLVG  
PTPVNIIGRNLLTQIGCTLNF  
>257931\_5 0.5  
PQITLWQRPFVTVKIGGQLKEALLDTGADNTVIEDISLPGRWKPMIGGIGGFVVKVQYEQVSVEICGHKAIGTVLVG  
PTPVNIIGRNLLTKIGCTLNF  
>257931\_6 0.5  
PQITLWQRPFVTVKIGGQLKEALLDTGADNTVIEDISLPGRWKPMIGGIGGFVVKVQYEQVSVEICGHKAMGTVLVG  
PTPVNIIGRNLLTQIGCTLNF  
>257931\_7 0.5  
PQITLWQRPFVTVKIGGQLKEALLDTGADNTVIEDISLPGRWKPMIGGIGGFVVKVQYEQVSVEICGHKAMGTVLVG  
PTPVNIIGRNLLTKIGCTLNF  
>257931\_8 0.5  
PQITLWQRPFVTVKIGGQLKEALIDTGADNTVIEDISLPGRWKPMIGGIGGFVVKVQYEQVSVEICGHKAIGTVLVG  
PTPVNIIGRNLLTQIGCTLNF  
>257931\_9 0.5  
PQITLWQRPFVTVKIGGQLKEALIDTGADNTVIEDISLPGRWKPMIGGIGGFVVKVQYEQVSVEICGHKAIGTVLVG  
PTPVNIIGRNLLTKIGCTLNF  
>257931\_10 0.5  
PQITLWQRPFVTVKIGGQLKEALIDTGADNTVIEDISLPGRWKPMIGGIGGFVVKVQYEQVSVEICGHKAMGTVLVG  
PTPVNIIGRNLLTQIGCTLNF  
>187121\_4 0.4  
PQITLWQRPLVTIKIGGHLKGALLDTGADDTVLEEMSLPGRWKPKMIGGIGGFIVKQYDQIPIEICGHKAIGTVLVG  
PTPVNIIGRNLLTQIGCTLNF  
>187121\_5 0.4  
PQITLWQRPLVTIKIGGHLKGALLDTGADDTVLEEMSLPGRWKPKMIGGIGGFIVKQYDQIPIEICGHKAIGTVLIG  
PTPVNIIGRNLLTQIGCTLNF  
>187121\_6 0.4  
PQITLWQRPLVTIKIGGHLKGALLDTGADDTVLEEMSLPGRWRPKMIGGIGGFIVKQYDQIPIEICGHKAIGTVLVG  
PTPVNIIGRNLLTQIGCTLNF  
>187121\_7 0.4  
PQITLWQRPLVTIKIGGHLKGALLDTGADDTVLEEMSLPGRWRPKMIGGIGGFIVKQYDQIPIEICGHKAIGTVLIG  
PTPVNIIGRNLLTQIGCTLNF  
>187121\_12 0.4  
PQITLWQRPLVTIKVGGHLKGALLDTGADDTVLEEMSLPGRWKPKMIGGIGGFIVKQYDQIPIEICGHKAIGTVLVG  
PTPVNIIGRNLLTQIGCTLNF  
>187121\_13 0.4  
PQITLWQRPLVTIKVGGHLKGALLDTGADDTVLEEMSLPGRWRPKMIGGIGGFIVKQYDQIPIEICGHKAIGTVLIG  
PTPVNIIGRNLLTQIGCTLNF  
>187121\_14 0.4  
PQITLWQRPLVTIKVGGHLKGALLDTGADDTVLEEMSLPGRWRPKMIGGIGGFIVKQYDQIPIEICGHKAIGTVLVG  
PTPVNIIGRNLLTQIGCTLNF  
>187121\_15 0.4  
PQITLWQRPLVTIKVGGHLKGALLDTGADDTVLEEMSLPGRWRPKMIGGIGGFIVKQYDQIPIEICGHKAIGTVLIG  
PTPVNIIGRNLLTQIGCTLNF  
>116920\_1 0.4  
PQITLWQRPLVTIKIGGQLKEALLDTGADDTVLEEMNLPGRWKPRMIGGLGGFIKVRQYDQVPIEICGHKIVSTVLIG  
PTPANIIGRNLLTQLGCTLNF  
>143459\_0 0.2  
PQITLWQRPIVTIKIGGQLKEALLDTGADNTVFEEMNLPGRWKPKLIGGIGGLLVREYDQIPIEICGHKTISTVLIG  
PTPVNIIGRDLLTQIGCTLNF  
>257929\_0 0.4  
PQITLWQRPLVTVKVGQQLKEALLDTGADDTVLEEMNLQGRWKPKMIGGIGGFIVKQYDQIPVEICGHKAIGTVLVG  
PTPVNIIGRNLLTQIGCTLNF  
>81801\_0 0.3

PQITLWQRPLVTIKIGGQLREALDGTGADDTVLEDIDLPGRWKPKMIGGIGGLIKVRQYDQPIEICGKKTGTVGLIG  
PTPANIIGRNLLTQIGCTLNF  
>116920\_2 0.4  
PQITLWQRPLVTIKIGGQLKEALLDGTGADDTVLEEMNLPGRWKPRMIGGLGGFIKVRQYDQVPIEICGHKTGTVGLIG  
PTPANIIGRNLLTQLGCTLNF  
>143336\_2 0.5  
PQITLWQRPLVTIKIGGQLKEALLDGTGADDTVLEEMNLPGRWKPKMIGGIGGFIKVRQYDQVPIEICGHKVICTVLIG  
PTPVNIIGRNLMTQLGCTLNF  
>143336\_6 0.5  
PQITLWQRPLVTIKIGGQLKEALLDGTGADDTVLEEMNLPGRWKPKMIGGLGGFIKVRQYDQVPIEICGHKVICTVLIG  
PTPVNIIGRNLMTQLGCTLNF  
>143336\_10 0.5  
PQITLWQRPLVTIKIGGQLKEALLDGTGADDTILEEMNLPGRWKPKMIGGIGGFIKVRQYDQVPIEICGHKVICTVLIG  
PTPVNIIGRNLMTQLGCTLNF  
>143336\_14 0.5  
PQITLWQRPLVTIKIGGQLKEALLDGTGADDTILEEMNLPGRWKPKMIGGLGGFIKVRQYDQVPIEICGHKVICTVLIG  
PTPVNIIGRNLMTQLGCTLNF  
>143336\_18 0.5  
PQITLWQRPLVTIKIGGQLKEAILDGTGADDTVLEEMNLPGRWKPKMIGGIGGFIKVRQYDQVPIEICGHKVICTVLIG  
PTPVNIIGRNLMTQLGCTLNF  
>143336\_22 0.5  
PQITLWQRPLVTIKIGGQLKEAILDGTGADDTVLEEMNLPGRWKPKMIGGLGGFIKVRQYDQVPIEICGHKVICTVLIG  
PTPVNIIGRNLMTQLGCTLNF  
>143336\_26 0.5  
PQITLWQRPLVTIKIGGQLKEAILDGTGADDTILEEMNLPGRWKPKMIGGIGGFIKVRQYDQVPIEICGHKVICTVLIG  
PTPVNIIGRNLMTQLGCTLNF  
>143336\_0 0.5  
PQITLWQRPLVTIKIGGQLKEALLDGTGADDTVLEEMNLPGRWKPKMIGGIGGFIKVRQYDQVPIEICGHKAICTVLIG  
PTPVNIIGRNLMTQLGCTLNF  
>143336\_4 0.5  
PQITLWQRPLVTIKIGGQLKEALLDGTGADDTVLEEMNLPGRWKPKMIGGLGGFIKVRQYDQVPIEICGHKAICTVLIG  
PTPVNIIGRNLMTQLGCTLNF  
>143336\_8 0.5  
PQITLWQRPLVTIKIGGQLKEALLDGTGADDTILEEMNLPGRWKPKMIGGIGGFIKVRQYDQVPIEICGHKAICTVLIG  
PTPVNIIGRNLMTQLGCTLNF  
>143336\_12 0.5  
PQITLWQRPLVTIKIGGQLKEALLDGTGADDTILEEMNLPGRWKPKMIGGLGGFIKVRQYDQVPIEICGHKAICTVLIG  
PTPVNIIGRNLMTQLGCTLNF  
>143336\_16 0.5  
PQITLWQRPLVTIKIGGQLKEAILDGTGADDTVLEEMNLPGRWKPKMIGGIGGFIKVRQYDQVPIEICGHKAICTVLIG  
PTPVNIIGRNLMTQLGCTLNF  
>143336\_20 0.5  
PQITLWQRPLVTIKIGGQLKEAILDGTGADDTVLEEMNLPGRWKPKMIGGLGGFIKVRQYDQVPIEICGHKAICTVLIG  
PTPVNIIGRNLMTQLGCTLNF  
>143336\_24 0.5  
PQITLWQRPLVTIKIGGQLKEAILDGTGADDTILEEMNLPGRWKPKMIGGIGGFIKVRQYDQVPIEICGHKAICTVLIG  
PTPVNIIGRNLMTQLGCTLNF  
>143336\_28 0.5  
PQITLWQRPLVTIKIGGQLKEAILDGTGADDTILEEMNLPGRWKPKMIGGLGGFIKVRQYDQVPIEICGHKAICTVLIG  
PTPVNIIGRNLMTQLGCTLNF  
>109484\_0 0.4  
PQITLWQRPLVTIKIGGQLKEALLDGTGADDTVLEEMNLPGRWKPKMIGGIGGFIKVRQYDQPIEICGHKATGTVLIG  
PTPVNIIGRNLLTQLGCTLNF  
>198533\_0 0.5  
PQITLWQRPLVTIKIGGQLKEALLDGTGADDTVLEEMELPGRWKPKMIGGIGGFIKVRQYDQPIEICGHTARGTVLVG  
PTPVNIIGRNLLTQIGCTLNF  
>216639\_0 0.5  
PQITLWQRPIVTIKIGGQIKEALLDGTGADDTVLEEITLPGKWKPKMIGGIGGFIKVGQYDQMPMEICGHKVIGTVLVG  
PTPVNIIGRNLLTQLGCTLNF  
>216639\_1 0.5  
PQITLWQRPIVTIKIGGQIKEALLDGTGADDTVLEEITLPGKWKPRMIGGIGGFIKVGQYDQMPMEICGHKVIGTVLVG  
PTPVNIIGRNLLTQLGCTLNF  
>216639\_2 0.5



PQITLWQRPVVTIKIGGQIKEALLDTGADDTVLEEITLPGKWKPKMIGGIGGFIKVGQYDQMPMEICGHKVIKTVLVG  
PTPVNIIGRNLLTQLGCTLNF  
>216639\_3 0.5  
PQITLWQRPVVTIKIGGQIKEALLDTGADDTVLEEITLPGKWKPRMIGGIGGFIKVGQYDQMPMEICGHKVIKTVLVG  
PTPVNIIGRNLLTQLGCTLNF  
>145683\_0 0.5  
PQITLWQRPIVTIKIGGQLKEALLDTGADDTVLEEMNLPGRWKPKMIGGIGGFIKVRQYDQIAIEICGHKAIGTVLVG  
PTPVNIIGRNLLTQLGCTLNF  
>145683\_1 0.5  
PQITLWQRPIVTIKIGGQLKEALLDTGADDTVLEEINLPGRWKPKMIGGIGGFIKVRQYDQIAIEICGHKAIGTVLVG  
PTPVNIIGRNLLTQLGCTLNF  
>109470\_0 0.4  
PQITLWQRPLVTIKIGGQLKEALLDTGADDTVLEEMNLPGRWKPKMIGGIGGFIKVRQYDEISIDICGHKAVGTVLIG  
PTPVNIIGRNLLTQIGCTLNF  
>109470\_2 0.4  
PQITLWQRPLVTIKIGGQLKEALLDTGADDTVLEEMSLPGRWKPKMIGGIGGFIKVRQYDEISIDICGHKAVGTVLIG  
PTPVNIIGRNLLTQIGCTLNF  
>148059\_0 0.4  
PQITLWQRPLVTIKIGGQLKEALLDTGADDTVLEEMNLPGRWKPKMIGGIGGFIKVKQYDQIQIEICGHKAIGTVLVG  
PTPVNIIGRNLLTQIGCTLNF  
>148111\_0 0.4  
PQITLWQRPLVTVKIGGQLKEALLDTGADDTVLEEMNLPGRWKPRMIGGIGGFIKVRQYDQISMEICGHKAIGTVLIG  
PTPVNIIGRNLLTQIGCTLNF  
>148111\_1 0.4  
PQITLWQRPLVTVKIGGQLKEALLDTGADDTVLEEMNLPGRWKPRMIGGIGGFIKVRQYDQVSMEICGHKAIGTVLIG  
PTPVNIIGRNLLTQIGCTLNF  
>172116\_0 0.3  
PQITLWQRPVVTIKIGGQLKEALLDTGADDTVLEDMDLPGRWKPKIIGGIGGFIKVRQYDQIPIEICGHKVISTVLIG  
PTPVNIIGRNLMTQLGCTLNF  
>172116\_1 0.3  
PQITLWQRPVVTIKIGGQLKEALLDTGADDTVLEDMDLPGRWKPKIIGGIGGFIRVRQYDQIPIEICGHKVISTVLIG  
PTPVNIIGRNLMTQLGCTLNF  
>116920\_0 0.4  
PQITLWQRPLVTIKIGGQLKEALLDTGADDTVLEEMNLPGRWKPRMIGGLGGFIKVRQYDQVPIEICGHKIVGTVLIG  
PTPANIIGRNLLTQLGCTLNF  
>75096\_0 0.4  
PQITLWQRPLVTIKIGGQLKEALLDTGADDTILEEMNLPGRWKPKMVGIGGFIKVRQYDEIPIEICGHKAIGTVLVG  
PTPANIIGRNLLTQLGCTLNF  
>81869\_0 0.4  
PQITLWQRPIVTIKIGGQLKEALIDTGADDTVLEEMNLPGRWKPKMIGGIGGFIKVRQYDQIPVEICGHKALGTVLIG  
PTPANIIGRNLLTQIGCTLNF  
>109408\_0 0.5  
PQITLWQRPLVTVKIGGQLKEALLDTGADNTVLEEMNLPGRWKPKMIGGIGGFIKVRQYDQIPIEICGHRTIGTVLIG  
PTPVNIIGRDLLTQIGCTLNF  
>109408\_1 0.5  
PQITLWQRPIVTVKIGGQLKEALLDTGADNTVLEEMNLPGRWKPKMIGGIGGFIKVRQYDQIPIEICGHRTIGTVLIG  
PTPVNIIGRDLLTQIGCTLNF
